# Supplementary material for: Pathophysiological, Genetic and Gene Expression Features of a Novel Rodent Model of the Cardio-Metabolic Syndrome
Source: PubMed Central journal article supplement (PMC2500170; doi:10.1371/journal.pone.0002962), 2008-08-13
Supplement: pone.0002962.s001.pdf [file pone.0002962.s001.pdf]

**Table S1.** SNP-based genotypes in colonies of rats of the Brown-Norway (BN), Goto-Kakizaki (GK), Wistar Kyoto (WKY), Spontaneously hypertensive (SHR), SHR stroke-prone (SHRSP) strains in the region of rat chromosome 1 of GK origin in BN.GK-Nidd/gk1 congenic rats. As reported in Fig.8 alleles shared between the BN and other strains are highlighted in yellow and alleles different to the BN are shown in blue. Heterozygous loci are shown in pink. SNP positions (b) in chromosome 1 are reported. SNP marker details are available through [http://www.well.ox.ac.uk/rat\\_mapping\\_resources/SNPbased\\_maps.html](http://www.well.ox.ac.uk/rat_mapping_resources/SNPbased_maps.html).

| SNP_Ensembl_ID   | SNP_External_ID               | Position (b) | STRAINS |         |         |        |         |          |                   |          |         |         |             |            |         |          |           |           |           |            |                       |        |       |                   |
|------------------|-------------------------------|--------------|---------|---------|---------|--------|---------|----------|-------------------|----------|---------|---------|-------------|------------|---------|----------|-----------|-----------|-----------|------------|-----------------------|--------|-------|-------------------|
|                  |                               |              | BN/Par  | WKY/Izm | WKY/NCh | WKY/Zm | WKY/Bbb | WKY/Okyo | WKY/Gla.,WKY/Cerc | WKY/NMna | SHR/Izm | SHR/NCh | SHR/Ola/pev | SHR/moiBbb | SHR/Kyo | SHR/NHsd | SHRSP/Izm | SHRSP/Bbb | SHRSP/Ezo | SHRSP/Ngsk | SHRSP/Gla.,SHRSP/Cerc | GK/Sic | GK/Ox | BN.GK-Nidd/gk1/Ox |
| ENSRNOSNP2783757 | J336026                       | 89665243     | C       | C       | T       | T      | T       | C        | T                 | T        | T       | T       | T           | T          | T       | T        | T         | T         | T         | T          | -                     | T      | T     | T                 |
| ENSRNOSNP2783758 | WKY-G-j-45h11_fl_383          | 89798155     | T       | C       | C       | C      | C       | C        | C                 | C        | C       | C       | C           | C          | C       | C        | C         | C         | C         | C          | C                     | T      | T     | T                 |
| ENSRNOSNP2783759 | gnl ti 842490884_50710952_687 | 90431156     | T       | C       | T       | T      | T       | T        | T                 | T        | C       | C       | C           | C          | C       | C        | C         | C         | C         | C          | C                     | T      | T     | T                 |
| ENSRNOSNP2783760 | J596244                       | 90735234     | C       | C       | C       | C      | C       | C        | C                 | C        | C       | C       | C           | C          | C       | C        | C         | C         | C         | C          | -                     | G      | G     | G                 |
| ENSRNOSNP2783761 | Cpn_1090749408                | 90749408     | C       | C       | C       | C      | C       | C        | C                 | C        | C       | C       | C           | C          | C       | C        | C         | C         | C         | C          | C                     | T      | T     | T                 |
| ENSRNOSNP2783762 | gko-23f24_fp2_b1_431          | 91081446     | C       | C       | C       | C      | C       | C        | C                 | C        | C       | C       | C           | C          | C       | C        | C         | C         | C         | C          | C                     | G      | G     | G                 |
| ENSRNOSNP2783763 | J546795                       | 91171603     | G       | G       | G       | G      | G       | G        | G                 | G        | G       | G       | G           | G          | G       | G        | G         | G         | G         | G          | -                     | T      | T     | T                 |
| ENSRNOSNP2783764 | J533325                       | 91371118     | G       | G       | G       | G      | G       | G        | G                 | G        | G       | G       | G           | G          | G       | G        | G         | G         | G         | G          | -                     | A      | A     | A                 |
| ENSRNOSNP2783765 | J341779                       | 91702897     | G       | A       | A       | A      | A       | A        | A                 | A        | A       | A       | A           | A          | A       | A        | A         | A         | A         | A          | A                     | A      | A     | A                 |
| ENSRNOSNP2783766 | WKYc18e09_s1_438              | 91834851     | C       | T       | T       | T      | T       | T        | T                 | T        | T       | T       | T           | T          | T       | T        | T         | T         | T         | T          | -                     | T      | T     | T                 |
| ENSRNOSNP2783767 | J495136                       | 91857887     | C       | T       | T       | T      | T       | T        | T                 | T        | T       | T       | T           | T          | T       | T        | T         | T         | T         | T          | -                     | T      | T     | T                 |
| ENSRNOSNP2783768 | J873803                       | 92142332     | G       | A       | A       | A      | A       | A        | A                 | A        | A       | A       | A           | A          | A       | A        | A         | A         | A         | A          | A                     | A      | A     | A                 |
| ENSRNOSNP2783769 | rat101_005_o02.p1ca_204       | 92276533     | A       | G       | G       | G      | G       | G        | G                 | G        | G       | G       | G           | G          | G       | G        | G         | G         | G         | G          | G                     | G      | G     | G                 |
| ENSRNOSNP2783770 | J642278                       | 92287946     | G       | A       | A       | A      | A       | A        | A                 | A        | A       | A       | A           | A          | A       | A        | A         | A         | A         | A          | -                     | A      | A     | A                 |
| ENSRNOSNP2783771 | WKYc95a06_s1_703              | 92339833     | G       | -       | A       | A      | A       | A        | A                 | A        | A       | A       | -           | A          | A       | A        | A         | A         | A         | A          | A                     | A      | A     | A                 |
| ENSRNOSNP2783772 | WKYc02d01_r1_652              | 92476744     | C       | T       | T       | T      | T       | T        | T                 | T        | T       | T       | T           | T          | T       | T        | T         | T         | T         | T          | T                     | T      | T     | T                 |
| ENSRNOSNP2783773 | J1261396                      | 92714418     | A       | T       | T       | -      | T       | T        | -                 | T        | T       | T       | T           | T          | -       | T        | T         | T         | T         | -          | T                     | T      | T     |                   |
| ENSRNOSNP2783774 | gko-66f21_fp2_b1_272          | 92870190     | G       | -       | A       | A      | A       | A        | A                 | A        | A       | -       | A           | A          | -       | A        | A         | A         | A         | A          | A                     | A      | A     | A                 |
| ENSRNOSNP2783775 | gko-104e7_rp2_b1_177          | 93597048     | C       | T       | T       | T      | T       | T        | T                 | T        | T       | T       | T           | T          | T       | T        | T         | T         | T         | T          | T                     | T      | T     | T                 |
| ENSRNOSNP2783776 | WKYOa73f10_s1_456             | 93760176     | A       | G       | G       | G      | G       | G        | G                 | G        | G       | G       | G           | G          | G       | G        | G         | G         | G         | G          | G                     | G      | G     | G                 |
| ENSRNOSNP2783777 | J1288901                      | 93917072     | A       | C       | C       | C      | C       | C        | A                 | C        | A       | A       | A           | A          | A       | A        | A         | A         | A         | A          | A                     | A      | A     | A                 |
| ENSRNOSNP2783779 | WKYc110g02_r1_646             | 94624428     | G       | A       | A       | -      | A       | A        | G                 | A        | G       | G       | G           | G          | G       | G        | G         | G         | G         | G          | G                     | G      | G     | G                 |
| ENSRNOSNP2783780 | rdahl-25i13_rp2_b1_125        | 95200769     | C       | C       | C       | C      | C       | C        | C                 | C        | C       | C       | C           | C          | C       | C        | C         | C         | C         | C          | C                     | C      | C     | C                 |
| ENSRNOSNP2783782 | J640192                       | 95446362     | G       | G       | G       | G      | G       | G        | G                 | G        | G       | G       | G           | G          | G       | G        | G         | G         | G         | G          | -                     | G      | G     | G                 |
| ENSRNOSNP2783783 | J876484                       | 95622713     | G       | G       | G       | G      | G       | G        | G                 | G        | G       | G       | G           | G          | G       | G        | G         | G         | G         | G          | G                     | G      | G     | G                 |
| ENSRNOSNP2783786 | J687602                       | 96557183     | G       | T       | G       | -      | G       | T        | -                 | T        | -       | G       | G           | G          | -       | -        | -         | G         | T         | T          | -                     | G      | G     | G                 |
| ENSRNOSNP2783788 | rat108_009_h10.q1cc_225       | 97225611     | T       | T       | T       | T      | T       | T        | T                 | C        | T       | T       | T           | C          | T       | C        | C         | C         | C         | C          | T                     | T      | T     |                   |











|                  |                                     |           |   |   |   |   |   |   |   |   |   |   |   |    |   |   |   |   |   |   |   |   |   |   |
|------------------|-------------------------------------|-----------|---|---|---|---|---|---|---|---|---|---|---|----|---|---|---|---|---|---|---|---|---|---|
| ENSRNOSNP2783986 | rdahl-85m10_rp2_b1_286              | 125067180 | T | C | C | C | - | T | T | C | T | T | T | T  | T | T | T | T | T | T | T | T | T |   |
| ENSRNOSNP2783987 | WKY-G-i-43b09_r1_156                | 125206090 | T | C | C | C | C | T | T | C | T | T | T | T  | T | T | T | T | T | T | T | T | T |   |
| ENSRNOSNP2783988 | rdahl-64f7_rp2_b1_314               | 125399506 | G | G | G | G | G | G | G | G | G | G | G | G  | G | G | G | G | G | G | G | G | - |   |
| ENSRNOSNP2783989 | J560662                             | 125732017 | A | G | G | G | G | G | G | G | G | G | G | G  | G | G | G | G | G | G | - | G | G | G |
| ENSRNOSNP2783990 | WKYc31f03_r1_274                    | 125744107 | A | G | G | G | G | A | A | G | A | A | A | A  | A | A | A | A | A | A | A | A | A |   |
| ENSRNOSNP2783991 | gnl ti 896459517_19866866811072_324 | 125888242 | T | T | T | T | T | C | C | T | C | C | C | C  | C | C | C | C | C | C | C | C | C |   |
| ENSRNOSNP2783992 | J340033                             | 125943437 | C | C | C | C | C | T | T | C | T | T | T | T  | T | T | T | T | T | T | T | T | T |   |
| ENSRNOSNP2783993 | rdahl-65i17_fp2_b1_264              | 126031585 | A | C | C | C | C | C | C | C | C | C | C | C  | C | C | C | C | C | C | C | C | C |   |
| ENSRNOSNP2783994 | SHRSPc16a12_r1_685                  | 126182325 | G | A | A | A | A | A | A | A | A | A | A | A  | A | A | A | A | A | A | A | A | A |   |
| ENSRNOSNP2783995 | J493980                             | 126205284 | C | T | T | T | T | T | T | T | T | T | T | T  | T | T | T | T | T | T | T | - | T |   |
| ENSRNOSNP2783996 | gnl ti 896794926_19866866988801_238 | 126399335 | T | T | T | T | T | A | A | T | A | A | A | A  | A | A | A | A | A | A | A | A | A |   |
| ENSRNOSNP2783997 | J663723                             | 126694797 | G | G | G | G | G | A | A | G | A | A | A | A  | A | A | A | A | A | A | A | A | A |   |
| ENSRNOSNP2783998 | J1264291                            | 126785666 | T | G | G | G | G | T | T | G | T | T | T | T  | T | T | T | T | T | T | T | - | T |   |
| ENSRNOSNP2783999 | rdahl-62i15_fp2_b1_120              | 126859750 | G | A | A | A | A | A | A | A | A | A | A | A  | A | A | A | A | A | A | A | A | A |   |
| ENSRNOSNP2784000 | gnl ti 896506642_19866866707088_346 | 127200967 | T | C | C | C | C | T | T | C | T | T | T | T  | T | T | T | T | - | T | T | C | C |   |
| ENSRNOSNP2784001 | J513002                             | 127221005 | A | G | G | G | G | A | A | G | A | A | A | A  | A | A | A | A | A | A | A | A | G |   |
| ENSRNOSNP2784002 | gko-22g6_fp2_b1_260                 | 127345560 | G | - | A | A | A | A | A | G | A | G | G | G  | G | G | G | G | G | G | G | G | A |   |
| ENSRNOSNP2784003 | gko-63h7_fp2_b1_550                 | 127488604 | C | A | A | A | A | A | A | A | A | A | A | A  | A | A | A | A | A | A | A | A | A |   |
| ENSRNOSNP2784004 | J484245                             | 127549453 | C | A | A | A | A | A | A | A | A | A | A | A  | A | A | A | A | A | A | A | A | A |   |
| ENSRNOSNP2784005 | rdahl-51e12_fp2_b1_593              | 127629857 | C | T | T | T | T | T | C | T | C | C | C | C  | C | C | C | C | C | C | C | C | T |   |
| ENSRNOSNP2784006 | DahlSa02a06_s1_117                  | 127770797 | C | T | T | T | T | T | C | T | C | C | C | C  | C | C | C | C | C | C | C | C | T |   |
| ENSRNOSNP2784007 | J337061                             | 127889173 | C | T | T | T | T | T | T | T | T | T | T | CT | T | T | T | T | T | T | T | T | T |   |
| ENSRNOSNP2784008 | gko-82b16_fp2_b1_323                | 127910938 | C | T | T | T | T | T | - | T | C | C | C | C  | C | C | C | C | C | C | C | C | T |   |
| ENSRNOSNP2784009 | SHRSPa7h07_s1_743                   | 129396852 | G | G | G | G | G | G | A | G | A | A | A | A  | A | A | A | A | A | A | A | A | A |   |
| ENSRNOSNP2784010 | J477469                             | 129959510 | T | T | T | T | T | T | C | T | C | C | C | C  | C | C | C | C | C | C | C | - | C |   |
| ENSRNOSNP2784011 | J505223                             | 130063483 | G | A | A | A | A | A | G | A | G | G | G | G  | G | G | G | G | G | G | G | G | A |   |
| ENSRNOSNP2784012 | gko-39i8_rp2_b1_95                  | 130181654 | A | A | A | A | A | A | G | A | G | G | G | G  | G | G | G | G | G | G | G | G | G |   |
| ENSRNOSNP2784013 | gko-70i2_rp2_b1_21                  | 130473538 | A | A | A | A | A | A | A | A | A | A | A | A  | A | A | A | A | A | A | A | A | G |   |
| ENSRNOSNP2784014 | J1269615                            | 130588481 | G | A | A | A | A | A | A | A | A | A | A | A  | A | A | A | A | A | A | A | - | G |   |
| ENSRNOSNP2784015 | J1278186                            | 131035380 | A | T | T | T | T | T | T | T | T | T | T | T  | T | T | T | T | T | T | T | T | T |   |
| ENSRNOSNP2784016 | rat109_012_n15.q1ca_334             | 131082411 | C | C | C | C | C | C | A | C | A | A | A | A  | A | A | A | A | A | A | A | A | A |   |
| ENSRNOSNP2784017 | WKYe17a08_r1_604                    | 131104776 | A | G | G | G | G | G | G | G | G | G | G | G  | G | G | G | G | G | G | G | G | G |   |
| ENSRNOSNP2784018 | J488690                             | 131227640 | A | T | T | T | T | T | T | T | T | T | T | T  | T | T | T | T | T | T | T | - | T |   |
| ENSRNOSNP2784019 | WKYOa64h04_s1_476                   | 131311649 | C | T | T | T | T | T | C | T | C | C | C | C  | C | C | C | C | C | C | C | C | C |   |
| ENSRNOSNP2784020 | rat109_015_i21.q1cb_425             | 131354318 | A | G | G | G | G | G | G | G | G | G | G | G  | G | G | G | G | G | G | G | G | G |   |
| ENSRNOSNP2784021 | J523743                             | 131492282 | G | A | A | A | A | A | A | A | A | A | A | A  | A | A | A | A | A | A | A | A | A |   |
| ENSRNOSNP2784022 | J470814                             | 131658534 | T | C | C | - | C | C | - | C | C | C | C | C  | C | - | C | C | C | C | - | C | C |   |
| ENSRNOSNP2784023 | SHRSPa43c12_s1_448                  | 131711026 | T | C | C | C | C | C | C | C | C | C | C | C  | C | C | C | C | C | C | C | C | C |   |
| ENSRNOSNP2784024 | J515676                             | 131793615 | A | A | C | C | - | C | - | - | - | - | - | -  | C | C | C | - | - | - | - | C | A |   |







|                  |                                     |           |   |    |   |   |   |    |   |    |    |   |   |   |    |   |   |   |   |    |   |    |   |    |
|------------------|-------------------------------------|-----------|---|----|---|---|---|----|---|----|----|---|---|---|----|---|---|---|---|----|---|----|---|----|
| ENSRNOSNP2784106 | J643969                             | 139928077 | T | G  | G | G | G | G  | G | G  | G  | G | G | G | G  | G | G | G | G | -  | G | G  | G |    |
| ENSRNOSNP2784107 | J587239                             | 140156428 | C | T  | T | T | T | T  | T | T  | T  | T | T | T | T  | T | T | T | T | T  | T | T  | T |    |
| ENSRNOSNP2784108 | Cpn_1140157723                      | 140157723 | G | A  | A | A | A | A  | A | A  | A  | A | A | A | A  | A | A | A | A | A  | A | A  | A |    |
| ENSRNOSNP2784110 | SHRSPd02b11_s1_385                  | 140348073 | A | C  | C | C | C | C  | C | C  | C  | C | C | C | C  | C | C | C | C | C  | C | C  | C |    |
| ENSRNOSNP2784111 | J1269962                            | 140445019 | C | G  | G | G | G | G  | G | G  | G  | G | G | G | G  | G | G | G | G | -  | G | G  | G |    |
| ENSRNOSNP2784112 | WKYc98h01_s1_194                    | 140489442 | T | C  | C | C | C | C  | C | C  | C  | C | C | C | C  | C | C | C | C | C  | C | C  | C |    |
| ENSRNOSNP2784113 | rat101_031_g24.p1ca_120             | 140536584 | G | C  | C | C | C | C  | C | C  | C  | C | C | C | C  | C | C | C | C | C  | C | C  | C |    |
| ENSRNOSNP2784114 | SHRSPa28h09_s1_387                  | 140557472 | C | T  | T | T | T | T  | T | T  | T  | - | T | T | T  | T | T | T | - | T  | T | T  | T |    |
| ENSRNOSNP2784115 | gnl ti 896466819_19866866741309_253 | 140631751 | T | C  | C | C | C | C  | C | C  | C  | C | C | C | C  | C | C | C | C | C  | C | C  | C |    |
| ENSRNOSNP2784116 | J538856                             | 140635848 | C | T  | T | T | T | T  | T | T  | T  | T | T | T | T  | T | T | T | T | T  | T | T  | T |    |
| ENSRNOSNP2784117 | rdahl-93m20_fp2_b1_30               | 140855729 | T | G  | G | G | G | G  | G | G  | G  | G | G | G | G  | G | G | G | G | G  | G | G  | G |    |
| ENSRNOSNP2784118 | rat110_004_b24.p1cb_433             | 140954681 | C | T  | T | T | T | T  | T | T  | T  | T | T | T | T  | T | T | T | T | T  | T | T  | T |    |
| ENSRNOSNP2784119 | J632732                             | 141047221 | C | CT | C | - | C | CT | - | CT | CT | C | C | C | CT | - | C | C | - | CT | - | CT | C | CT |
| ENSRNOSNP2784120 | rdahl-54a23_fp2_b1_378              | 141991143 | C | T  | T | T | T | T  | T | T  | T  | T | T | T | T  | T | T | T | T | T  | T | T  | T |    |
| ENSRNOSNP2784121 | J502747                             | 142202112 | C | G  | G | G | G | G  | G | G  | G  | G | G | G | G  | G | G | G | G | -  | G | G  | G |    |
| ENSRNOSNP2784122 | J681141                             | 142306215 | A | G  | G | G | G | G  | G | G  | G  | G | G | G | G  | G | G | G | G | -  | G | G  | G |    |
| ENSRNOSNP2784123 | WKY-G-i-33e06_r1_299                | 142460692 | G | T  | T | T | T | T  | T | T  | T  | T | T | T | T  | T | T | T | T | T  | T | T  | T |    |
| ENSRNOSNP2784124 | J481007                             | 142523790 | G | C  | C | C | C | C  | C | C  | C  | C | C | C | C  | C | C | C | C | -  | C | C  | C |    |
| ENSRNOSNP2784125 | gnl ti 896833025_19866867232697_211 | 142629254 | A | T  | T | T | T | T  | T | T  | T  | T | T | T | T  | T | T | T | T | T  | T | T  | T |    |
| ENSRNOSNP2784126 | J701827                             | 142647913 | C | T  | T | T | T | T  | T | T  | T  | T | T | T | T  | T | T | T | T | -  | T | T  | T |    |
| ENSRNOSNP2784127 | J656809                             | 142747867 | A | C  | C | C | C | C  | C | C  | C  | C | C | C | C  | C | C | C | C | C  | C | C  | C |    |
| ENSRNOSNP2784128 | J342513                             | 142859802 | G | A  | A | A | A | A  | A | A  | A  | A | A | A | A  | A | A | A | A | -  | A | A  | A |    |
| ENSRNOSNP2784129 | WKY-G-j-65d03_r1_222                | 142971713 | C | A  | A | A | A | A  | A | A  | A  | A | A | A | A  | A | A | A | A | A  | A | A  | A |    |
| ENSRNOSNP2784130 | rdahl-51i14_fp2_b1_655              | 143203436 | C | A  | A | A | A | A  | A | A  | A  | A | A | A | A  | A | A | A | A | A  | A | A  | A |    |
| ENSRNOSNP2784131 | J873721                             | 143310300 | C | T  | T | T | T | T  | T | T  | T  | T | T | T | T  | T | T | T | T | T  | T | T  | T |    |
| ENSRNOSNP2784132 | J586599                             | 143440893 | G | A  | A | A | A | A  | A | A  | A  | A | A | A | A  | A | A | A | A | -  | A | A  | A |    |
| ENSRNOSNP2784133 | gko-2j12_rp2_b1_467                 | 143556969 | G | A  | A | A | A | A  | A | A  | A  | A | A | - | A  | A | A | A | A | A  | A | A  | A |    |
| ENSRNOSNP2784134 | J513874                             | 143650643 | T | C  | C | C | C | C  | C | C  | C  | C | C | C | C  | C | C | C | C | C  | C | C  | C |    |
| ENSRNOSNP2784135 | J342038                             | 143743917 | A | G  | G | G | G | G  | G | G  | G  | G | G | G | G  | G | G | G | G | -  | G | G  | G |    |
| ENSRNOSNP2784136 | gnl ti 896523251_19866867257922_232 | 143745033 | T | C  | C | C | C | C  | C | C  | C  | C | C | C | C  | C | C | C | C | C  | C | C  | C |    |
| ENSRNOSNP2784137 | J343800                             | 143898987 | A | G  | G | G | G | G  | G | G  | G  | G | G | G | G  | G | G | G | G | -  | G | G  | G |    |
| ENSRNOSNP2784138 | gko-37p17_rp2_b1_373                | 143913178 | C | A  | A | A | A | A  | A | A  | A  | A | A | A | A  | A | A | A | A | A  | A | A  | A |    |
| ENSRNOSNP2784139 | J533867                             | 144006680 | G | A  | A | A | A | A  | A | A  | A  | A | A | A | A  | A | A | A | A | A  | A | A  | A |    |
| ENSRNOSNP2784140 | J1260786                            | 144307816 | T | T  | A | A | A | T  | T | A  | T  | T | T | - | A  | T | T | A | T | A  | A | T  | T | T  |
| ENSRNOSNP2784141 | Cpn_1144367481                      | 144367481 | C | C  | T | T | T | C  | C | T  | C  | C | C | C | T  | C | C | T | C | T  | T | C  | C | C  |
| ENSRNOSNP2784142 | rat101_014_g21.p1ca_496             | 144477632 | A | G  | G | G | G | G  | G | G  | G  | G | G | G | G  | G | G | G | G | G  | G | G  | G |    |
| ENSRNOSNP2784143 | J634537                             | 144527766 | A | C  | C | C | C | C  | C | C  | C  | C | C | C | C  | C | C | C | C | -  | C | C  | C |    |
| ENSRNOSNP2784144 | WKYc57d08_r1_429                    | 144623181 | A | G  | G | G | G | G  | G | G  | G  | G | G | G | G  | G | G | G | G | G  | G | G  | G |    |
| ENSRNOSNP2784145 | J585274                             | 144644946 | A | T  | T | T | T | T  | T | T  | T  | T | T | T | T  | T | T | T | T | -  | T | T  | T |    |



|                  |                         |           |   |   |   |   |   |   |   |   |   |   |   |   |   |   |   |   |   |   |   |   |
|------------------|-------------------------|-----------|---|---|---|---|---|---|---|---|---|---|---|---|---|---|---|---|---|---|---|---|
| ENSRNOSNP2784187 | rdahl-26k16_rp2_b1_31   | 149647414 | T | C | C | C | C | C | C | C | C | C | C | C | C | C | C | C | C | C | - | - |
| ENSRNOSNP2784188 | rat102_008_m19.q1ca_590 | 149677673 | G | A | A | A | A | A | A | A | A | A | A | A | A | A | A | A | A | A | A | A |
| ENSRNOSNP2784189 | J521480                 | 149719493 | G | A | A | A | A | A | A | A | A | A | A | A | A | A | A | A | A | - | A | A |
| ENSRNOSNP2784190 | J341551                 | 149850859 | T | C | C | C | C | C | C | C | C | C | C | C | C | C | C | C | C | - | C | C |
| ENSRNOSNP2784191 | rdahl-71m20_fp2_b1_25   | 149853461 | G | A | A | A | A | A | A | A | A | A | A | A | A | A | A | A | A | A | A | A |
| ENSRNOSNP2784193 | gko-96e1_fp2_b1_312     | 150096169 | T | A | A | A | A | A | A | A | A | A | A | A | A | A | A | A | A | A | A | A |
| ENSRNOSNP2784194 | gko-69e22_rp2_b1_389    | 150531490 | A | G | G | G | G | G | G | G | G | G | G | G | G | G | G | G | G | G | G | G |
| ENSRNOSNP2784195 | J590265                 | 150665121 | G | A | A | A | A | A | A | A | A | A | A | A | A | A | A | A | A | - | A | A |
| ENSRNOSNP2784196 | rdahl-20h11_fp2_b1_101  | 150715523 | C | T | T | T | T | T | T | T | T | T | T | T | T | T | T | T | T | T | T | - |
| ENSRNOSNP2784197 | rdahl-15h19_rp2_b1_111  | 150871328 | G | A | A | A | A | A | A | A | A | A | A | A | A | A | A | A | A | A | A | A |
| ENSRNOSNP2784198 | gko-61d19_rp2_b1_355    | 151036704 | G | A | A | A | A | A | A | A | A | A | A | A | A | A | A | A | A | A | A | A |
| ENSRNOSNP2784199 | J545191                 | 151073477 | C | C | C | - | C | C | - | C | C | C | C | C | - | C | C | C | C | - | C | C |
| ENSRNOSNP2784200 | rat108_034_p17.p1ca_344 | 151110344 | C | T | T | T | T | T | T | T | T | T | T | T | T | T | T | T | T | T | T | T |
| ENSRNOSNP2784201 | J342906                 | 151176087 | C | T | T | T | T | T | T | T | T | T | T | T | T | T | T | T | T | T | T | T |
| ENSRNOSNP2784202 | gko-14a24_fp2_b1_770    | 151184006 | G | C | C | C | C | C | C | C | C | C | C | C | C | C | C | C | C | C | C | C |
| ENSRNOSNP2784203 | gko-19n8_fp2_b1_332     | 151328091 | A | G | G | G | G | G | G | G | G | G | G | G | G | G | G | G | G | G | G | G |
| ENSRNOSNP2784204 | gko-84o14_fp2_b1_603    | 151502658 | T | C | C | C | C | C | C | C | C | C | C | - | C | C | C | C | C | C | C | C |
| ENSRNOSNP2784205 | J1268261                | 151532258 | T | C | C | C | C | C | C | C | C | C | C | C | C | C | C | C | C | C | C | C |
| ENSRNOSNP2784206 | gko-52n12_rp2_b1_88     | 151751640 | C | T | T | T | T | T | T | T | T | T | T | T | T | T | T | T | T | T | T | T |
| ENSRNOSNP2784207 | J686665                 | 151867905 | C | A | A | A | A | A | A | A | A | A | A | A | A | A | A | A | A | A | A | A |
| ENSRNOSNP2784208 | gko-16b9_rp2_b1_493     | 151950962 | A | G | G | G | G | G | G | G | G | G | G | G | G | G | G | G | G | G | G | G |
| ENSRNOSNP2784209 | gko-72i3_rp2_b1_55      | 152252637 | C | T | T | T | T | T | T | T | T | T | T | T | T | T | T | T | T | T | T | T |
| ENSRNOSNP2784210 | rdahl-24k12_fp2_b1_606  | 152447482 | C | T | T | T | T | T | T | T | T | T | T | T | T | T | T | T | T | T | T | T |
| ENSRNOSNP2784212 | SHRSPc66a05_r1_451      | 152809150 | G | A | A | A | A | A | A | A | A | A | A | A | A | A | A | A | A | A | A | A |
| ENSRNOSNP2784213 | gko-107n14_rp2_b1_139   | 152969343 | C | T | T | T | T | T | T | T | T | T | T | T | T | T | T | T | T | T | T | T |
| ENSRNOSNP2784214 | J579501                 | 153032526 | G | T | T | T | T | T | T | T | T | T | T | T | T | T | T | T | T | - | T | T |
| ENSRNOSNP2784215 | J505115                 | 153284646 | G | C | C | - | C | C | - | C | C | C | C | C | - | C | C | C | C | - | C | C |
| ENSRNOSNP2784216 | WKYe09g11_r1_768        | 153326053 | T | C | C | C | C | C | C | C | C | C | C | C | C | C | C | C | C | C | C | C |
| ENSRNOSNP2784217 | rat105_040_f05.q1ca_469 | 153472057 | T | G | G | G | G | G | G | G | G | G | G | G | G | G | G | G | G | G | G | G |
| ENSRNOSNP2784218 | J520598                 | 153477913 | T | C | C | C | C | C | C | C | C | C | C | C | C | C | C | C | C | - | C | C |
| ENSRNOSNP2784219 | SHRSPc14d03_r1_326      | 153483576 | T | C | C | C | C | C | C | C | C | C | C | C | C | C | C | C | C | C | C | C |
| ENSRNOSNP2784220 | J475269                 | 153623495 | G | A | A | A | A | A | A | A | A | A | A | A | A | A | A | A | A | A | A | A |
| ENSRNOSNP2784221 | SHRSPa06f12_r1_1033     | 153817413 | G | A | - | A | A | A | A | A | A | A | A | A | A | A | A | A | A | A | A | A |
| ENSRNOSNP2784222 | J571366                 | 153945949 | A | G | G | G | G | G | G | G | G | G | G | G | G | G | G | G | G | G | G | G |
| ENSRNOSNP2784223 | J524373                 | 154061178 | C | T | T | T | T | T | T | T | T | T | T | T | T | T | T | T | T | - | T | T |
| ENSRNOSNP2784224 | SHRSPc38f04_r1_198      | 154092675 | A | G | G | G | G | G | G | G | G | G | G | G | G | G | G | G | G | G | G | G |
| ENSRNOSNP2784225 | rat101_021_a17.q1ca_666 | 154143673 | G | A | A | A | A | A | A | A | A | A | A | A | A | A | A | A | A | A | A | A |
| ENSRNOSNP2784227 | DahlSa01f01_r1_140      | 154390719 | C | T | T | T | T | T | T | T | T | T | T | T | T | T | T | T | T | T | T | T |
| ENSRNOSNP2784228 | J578596                 | 154495830 | T | C | C | - | C | C | - | C | C | C | C | C | - | C | C | C | C | - | C | C |











|                  |                                     |           |   |   |   |   |   |   |   |   |    |   |    |    |    |   |    |   |    |    |   |    |   |    |
|------------------|-------------------------------------|-----------|---|---|---|---|---|---|---|---|----|---|----|----|----|---|----|---|----|----|---|----|---|----|
| ENSRNOSNP2784385 | J339457                             | 170059164 | A | G | G | G | G | G | G | G | G  | G | G  | G  | G  | G | G  | G | G  | G  | - | G  | G | G  |
| ENSRNOSNP2784386 | rat104_017_n17.q1ca_148             | 170155100 | A | T | T | T | T | T | A | T | A  | A | A  | A  | A  | A | A  | A | A  | A  | A | T  | T | T  |
| ENSRNOSNP2784387 | rat105_019_e07.q1ca_158             | 170215759 | T | C | C | C | C | C | C | C | C  | C | C  | C  | C  | C | C  | C | C  | C  | C | C  | C | C  |
| ENSRNOSNP2784388 | J491809                             | 170320387 | A | T | T | T | T | T | T | T | T  | T | T  | T  | T  | T | T  | T | T  | T  | T | T  | T | T  |
| ENSRNOSNP2784389 | rat104_078_k11.q1ca_318             | 170387966 | A | G | G | G | G | G | G | G | G  | G | G  | G  | G  | G | G  | G | G  | G  | G | G  | G | G  |
| ENSRNOSNP2784390 | rat104_041_g07.q1ca_568             | 170390397 | T | A | A | A | A | A | A | A | A  | A | A  | A  | A  | A | A  | A | A  | A  | A | A  | A | A  |
| ENSRNOSNP2784391 | Cpn_1170390711                      | 170390711 | A | T | T | T | T | T | T | T | T  | T | T  | T  | T  | T | T  | T | T  | T  | T | T  | T | T  |
| ENSRNOSNP2784392 | J524207                             | 170414581 | G | T | T | T | T | T | T | T | T  | T | T  | T  | T  | T | T  | T | T  | T  | - | T  | T | T  |
| ENSRNOSNP2784393 | WKYc108e11_r1_248                   | 170487421 | C | T | T | T | T | T | T | T | T  | T | T  | T  | T  | T | T  | T | T  | T  | T | T  | T | T  |
| ENSRNOSNP2784394 | WKYOa15a01_s1_253                   | 170540189 | G | A | A | A | A | A | A | A | A  | A | A  | A  | A  | A | A  | A | A  | A  | A | A  | A | A  |
| ENSRNOSNP2784395 | J681433                             | 170683132 | T | T | T | T | T | T | C | T | C  | C | C  | C  | C  | C | C  | C | C  | C  | C | T  | T | T  |
| ENSRNOSNP2784397 | J493936                             | 171031968 | G | G | G | - | G | G | - | G | G  | G | G  | G  | G  | - | G  | G | G  | G  | - | G  | G | G  |
| ENSRNOSNP2784398 | gko-15d8_fp2_b1_203                 | 171121005 | C | C | C | C | C | C | C | C | C  | C | C  | C  | C  | C | C  | C | C  | C  | C | T  | T | T  |
| ENSRNOSNP2784399 | J544697                             | 171122739 | G | G | G | G | G | G | G | G | G  | G | G  | G  | G  | G | G  | G | G  | G  | - | A  | A | A  |
| ENSRNOSNP2784400 | J698287                             | 171233490 | C | C | C | C | C | C | T | C | T  | T | T  | T  | T  | T | T  | T | T  | T  | - | C  | C | C  |
| ENSRNOSNP2784401 | J693497                             | 171339211 | A | A | A | A | A | A | G | A | G  | G | G  | G  | G  | G | G  | G | G  | G  | G | G  | G | G  |
| ENSRNOSNP2784402 | WKYd03a03_s1_24                     | 171350839 | T | C | C | C | C | C | T | C | T  | T | T  | T  | T  | T | T  | T | T  | T  | T | T  | T | T  |
| ENSRNOSNP2784403 | SHRSPa19e09_r1_1104                 | 171442718 | C | C | C | C | C | C | T | C | T  | T | T  | T  | T  | T | T  | T | T  | T  | T | C  | C | C  |
| ENSRNOSNP2784404 | J525106                             | 171714538 | G | A | A | A | A | A | G | A | G  | G | G  | G  | G  | G | G  | G | G  | G  | G | A  | A | A  |
| ENSRNOSNP2784405 | J546199                             | 171836884 | G | G | G | G | G | G | G | G | G  | G | G  | G  | G  | G | G  | G | G  | G  | - | A  | A | A  |
| ENSRNOSNP2784406 | rdahl-50122_fp2_b1_78               | 171896496 | A | G | G | G | G | G | G | G | G  | G | G  | G  | G  | G | G  | G | G  | G  | G | A  | A | A  |
| ENSRNOSNP2784407 | J565259                             | 171934152 | G | T | T | T | T | T | T | T | T  | T | T  | T  | T  | T | T  | T | T  | T  | - | T  | T | T  |
| ENSRNOSNP2784408 | rat101_007_d20.q1ca_330             | 172020573 | T | C | C | C | C | C | T | C | T  | T | T  | T  | T  | T | T  | T | T  | T  | T | T  | T | T  |
| ENSRNOSNP2784409 | Cpn_1172021329                      | 172021329 | T | C | C | C | C | C | C | C | C  | C | C  | C  | -  | C | C  | C | C  | C  | C | C  | C | C  |
| ENSRNOSNP2784410 | J496805                             | 172099041 | C | C | C | - | C | C | - | C | CT | T | CT | CT | CT | - | CT | T | CT | CT | - | CT | T | CT |
| ENSRNOSNP2784411 | Cpn_1172199898                      | 172199898 | G | A | A | A | A | A | A | A | A  | A | A  | A  | A  | A | A  | A | A  | A  | A | A  | A | A  |
| ENSRNOSNP2784412 | rat013_038_a14.p1ca_244             | 172237945 | A | G | G | G | G | G | G | G | G  | G | G  | G  | G  | G | G  | G | G  | G  | G | G  | G | G  |
| ENSRNOSNP2784413 | SHRSPa8d01_s1_545                   | 172504303 | T | A | A | A | A | A | A | A | A  | A | A  | A  | A  | A | A  | A | A  | A  | A | A  | A | A  |
| ENSRNOSNP2784414 | Cpn_1172577432                      | 172577432 | C | T | T | T | T | T | T | T | T  | T | T  | T  | T  | T | T  | T | T  | T  | T | T  | T | T  |
| ENSRNOSNP2784415 | J481917                             | 172608002 | A | G | G | G | G | G | G | G | G  | G | G  | G  | G  | G | G  | G | G  | G  | - | G  | G | G  |
| ENSRNOSNP2784416 | J1311061                            | 172943805 | C | T | T | T | T | T | C | T | C  | C | C  | C  | C  | C | C  | C | C  | C  | C | C  | C | C  |
| ENSRNOSNP2784417 | WKYOa16b12_s1_248                   | 172998518 | T | C | C | T | C | T | C | C | C  | C | C  | C  | C  | C | C  | C | C  | C  | C | C  | C | C  |
| ENSRNOSNP2784418 | gko-8j6_fp2_b1_537                  | 173147475 | A | G | G | G | G | G | G | G | G  | G | G  | G  | G  | G | G  | G | G  | G  | - | G  | G | G  |
| ENSRNOSNP2784419 | J667769                             | 173261603 | A | G | G | G | G | G | G | G | G  | G | G  | G  | G  | G | G  | G | G  | G  | G | G  | G | G  |
| ENSRNOSNP2784420 | J697407                             | 173376457 | G | A | A | G | A | G | A | A | A  | A | A  | A  | A  | A | A  | A | A  | A  | - | A  | A | A  |
| ENSRNOSNP2784421 | WKYe15d11_r1_436                    | 173398184 | A | G | G | G | G | G | G | G | G  | G | G  | G  | G  | G | G  | G | G  | G  | G | G  | G | G  |
| ENSRNOSNP2784422 | J873194                             | 173478225 | T | G | G | G | G | G | G | G | G  | G | G  | G  | G  | G | G  | G | G  | G  | - | G  | G | G  |
| ENSRNOSNP2784423 | gnl ti 896858076_19866867464063_287 | 173583296 | T | G | G | G | G | G | G | G | G  | G | G  | G  | G  | G | G  | G | G  | G  | G | G  | G | G  |
| ENSRNOSNP2784424 | J593426                             | 173632653 | G | A | G | - | G | - | - | G | -  | G | G  | G  | -  | - | G  | G | G  | G  | - | A  | A | A  |



|                  |                                     |           |   |   |   |   |   |   |   |   |   |   |   |   |   |   |   |   |   |   |   |   |   |    |   |
|------------------|-------------------------------------|-----------|---|---|---|---|---|---|---|---|---|---|---|---|---|---|---|---|---|---|---|---|---|----|---|
| ENSRNOSNP2784465 | J658570                             | 177498939 | G | A | A | G | A | G | G | A | G | G | G | G | G | G | G | G | G | - | A | A | A |    |   |
| ENSRNOSNP2784466 | J501732                             | 177641595 | A | A | G | - | G | - | - | G | - | G | G | G | - | - | - | G | G | - | - | A | G | G  |   |
| ENSRNOSNP2784467 | rat104_063_f19.q1ca_239             | 177710051 | T | C | C | C | C | C | C | C | C | C | C | C | C | C | C | C | C | C | C | T | T | T  |   |
| ENSRNOSNP2784468 | rat104_016_i10.q1ca_233             | 177729282 | A | A | T | T | T | T | T | T | T | T | T | T | T | T | T | T | T | T | T | A | A | A  |   |
| ENSRNOSNP2784469 | rat110_012_k07.p1ca_206             | 177742486 | A | A | G | G | G | G | G | G | G | G | G | G | G | G | G | G | G | G | G | A | A | A  |   |
| ENSRNOSNP2784470 | rat103_009_n14.p1ca_367             | 177787510 | G | A | A | A | A | A | A | A | A | A | A | A | A | A | A | A | A | A | A | G | G | G  |   |
| ENSRNOSNP2784471 | rat104_035_i20.q1ca_278             | 177808278 | T | C | C | C | C | C | C | C | C | C | C | C | C | C | C | C | C | C | C | T | T | T  |   |
| ENSRNOSNP2784472 | rat110_009_b22.p1cb_209             | 177832111 | A | T | T | T | T | T | T | T | T | T | T | T | T | T | T | T | T | T | T | A | A | A  |   |
| ENSRNOSNP2784473 | rat110_004_a12.p1ca_181             | 177843913 | A | G | G | G | G | G | G | G | G | G | G | G | G | G | G | G | G | G | G | A | A | A  |   |
| ENSRNOSNP2784474 | rat110_003_i14.p1ca_603             | 177868706 | A | T | A | A | A | A | T | A | T | T | T | T | A | T | T | T | T | T | T | A | A | A  |   |
| ENSRNOSNP2784475 | J658758                             | 177950683 | G | A | A | - | A | A | - | A | A | A | A | A | A | - | A | A | A | A | - | - | G | G  |   |
| ENSRNOSNP2784476 | J651074                             | 178186474 | A | G | G | - | G | G | - | G | G | G | G | G | G | - | G | G | G | G | - | A | A | A  |   |
| ENSRNOSNP2784477 | J1268611                            | 179037626 | C | T | T | T | T | T | T | T | T | T | T | T | T | T | T | T | T | T | - | T | T | T  |   |
| ENSRNOSNP2784478 | J342027                             | 179193258 | A | G | G | G | G | G | G | G | G | G | G | G | G | G | G | G | G | G | G | - | A | A  | A |
| ENSRNOSNP2784479 | gko-6d2_rp2_b1_54                   | 179327802 | C | C | C | C | C | C | C | C | C | C | C | - | C | C | C | C | C | C | C | T | T | T  |   |
| ENSRNOSNP2784480 | J641586                             | 179745834 | A | A | G | - | G | A | - | A | A | G | G | G | A | - | A | G | A | A | - | A | G | G  |   |
| ENSRNOSNP2784481 | WKYa70e11_s1_159                    | 179862388 | C | T | T | T | T | T | T | T | T | T | T | T | T | T | T | T | T | - | T | T | T | T  |   |
| ENSRNOSNP2784482 | J337681                             | 179969065 | G | A | A | A | A | A | A | A | A | A | A | A | A | A | A | A | A | A | - | A | A | A  |   |
| ENSRNOSNP2784483 | WKYc17d09_r1_311                    | 180111057 | A | A | T | T | T | T | A | T | A | A | A | A | T | A | A | A | A | A | A | A | A | A  |   |
| ENSRNOSNP2784484 | J520374                             | 180115236 | C | C | C | C | C | C | C | C | C | C | C | C | C | C | C | C | C | C | C | T | T | T  |   |
| ENSRNOSNP2784485 | SHRSPc39f12_s1_515                  | 180177547 | G | A | G | G | G | G | A | G | A | A | A | A | G | A | A | A | A | A | A | G | G | G  |   |
| ENSRNOSNP2784486 | J677340                             | 180265854 | A | G | G | G | G | G | G | G | G | G | G | G | G | G | G | G | G | G | G | - | G | G  | G |
| ENSRNOSNP2784487 | gnl tj 896653520_19866868031586_293 | 180447327 | C | T | C | C | C | C | T | C | T | T | T | T | C | T | T | T | T | T | T | C | C | C  |   |
| ENSRNOSNP2784488 | rat110_026_a05.p1ca_576             | 180563088 | A | G | G | G | G | G | G | G | G | G | G | G | G | G | G | G | G | G | G | G | G | G  |   |
| ENSRNOSNP2784489 | J1275243                            | 180564598 | G | G | A | A | A | A | G | A | G | G | G | G | A | G | G | G | G | G | G | G | G | G  |   |
| ENSRNOSNP2784490 | J524358                             | 180794675 | A | T | T | T | T | T | T | T | T | T | T | T | T | T | T | T | T | T | T | - | T | T  | T |
| ENSRNOSNP2784491 | WKYc05b11_r1_249                    | 180822160 | C | C | T | T | T | T | C | T | C | C | C | C | T | C | C | C | C | C | C | C | C | C  |   |
| ENSRNOSNP2784492 | J475703                             | 180945746 | T | C | C | C | C | C | C | C | C | C | C | C | C | C | C | C | C | C | C | C | C | TC |   |
| ENSRNOSNP2784493 | Cpn_1181012647                      | 181012647 | C | T | T | T | T | T | T | T | T | T | T | T | T | T | T | T | T | T | T | T | T | T  |   |
| ENSRNOSNP2784494 | rat104_071_p19.q1cb_328             | 181134479 | G | G | A | G | A | G | G | - | G | G | G | G | G | G | G | G | G | G | G | G | G | G  |   |
| ENSRNOSNP2784495 | SHRSPc44h01_s1_152                  | 181287248 | C | G | C | C | C | C | G | C | G | G | G | G | C | G | G | G | G | G | G | C | C | C  |   |
| ENSRNOSNP2784496 | J681483                             | 181346420 | G | G | G | G | G | G | G | G | G | G | G | G | G | G | G | G | G | G | G | A | A | A  |   |
| ENSRNOSNP2784497 | rat101_002_n17.p1ca_220             | 181456824 | A | A | A | A | A | A | A | A | A | A | A | A | A | A | A | A | A | A | A | G | G | G  |   |
| ENSRNOSNP2784498 | SHRSPc48b07_r1_494                  | 181494720 | T | T | T | T | T | T | T | T | T | T | T | T | T | T | T | T | T | T | T | C | C | C  |   |
| ENSRNOSNP2784499 | J342907                             | 181648511 | A | C | C | C | C | C | C | C | C | C | C | C | C | C | C | C | C | C | C | A | A | A  |   |
| ENSRNOSNP2784500 | SHRSPa88h04_r1_739                  | 181758850 | A | G | - | - | - | - | G | - | G | G | G | G | - | G | G | G | G | G | G | A | A | A  |   |
| ENSRNOSNP2784501 | Cpn_1181818332                      | 181818332 | G | G | G | G | G | G | C | G | G | G | G | G | G | G | G | G | G | G | G | G | G | G  |   |
| ENSRNOSNP2784502 | SHRSPa77h07_r1_728                  | 181894869 | A | A | A | A | A | A | A | A | A | A | A | A | A | - | A | A | A | A | - | A | - | -  |   |
| ENSRNOSNP2784504 | gnl tj 896632804_19866867268301_330 | 182078913 | T | C | C | C | C | C | C | C | C | C | C | C | C | C | C | C | C | C | C | T | T | T  |   |

|                  |                                     |           |   |   |   |   |   |   |   |   |   |   |   |   |   |   |   |   |   |   |   |   |   |   |
|------------------|-------------------------------------|-----------|---|---|---|---|---|---|---|---|---|---|---|---|---|---|---|---|---|---|---|---|---|---|
| ENSRNOSNP2784505 | rat105_024_a03.q1ca_182             | 182133563 | C | T | T | T | T | T | T | T | T | T | T | T | T | T | T | T | T | T | C | C | C |   |
| ENSRNOSNP2784507 | J536664                             | 182256273 | G | G | G | G | G | G | G | G | G | G | G | G | G | G | G | G | G | G | - | G | G | G |
| ENSRNOSNP2784508 | Cpn_1182298109                      | 182298109 | C | G | C | C | C | C | G | C | G | G | G | G | C | G | G | G | G | G | G | C | C | C |
| ENSRNOSNP2784509 | J696930                             | 182379407 | T | A | T | T | T | T | A | T | A | A | A | A | T | A | A | A | A | A | A | T | T | T |
| ENSRNOSNP2784510 | J648013                             | 182535432 | C | C | C | C | C | C | C | C | C | C | C | C | C | C | C | C | C | C | - | C | C | C |
| ENSRNOSNP2784511 | gko-41g16_rp2_b1_39                 | 182647806 | C | T | C | C | C | C | T | C | T | T | T | T | C | T | T | T | T | T | T | C | C | C |
| ENSRNOSNP2784512 | J549179                             | 182725298 | C | C | C | C | C | C | C | C | C | C | C | C | C | C | C | C | C | C | C | C | C | C |
| ENSRNOSNP2784513 | WKY-G-i-27h03_f1_175                | 182868662 | C | C | C | C | C | C | C | C | C | C | C | C | C | C | C | C | C | C | C | T | T | T |
| ENSRNOSNP2784514 | gnl tj 897048428_19866867478919_368 | 183065176 | C | T | T | T | T | T | C | T | C | C | C | C | T | C | C | C | C | C | C | C | C | C |
| ENSRNOSNP2784515 | SHRSPa17e11_s1_471                  | 183683647 | A | T | T | T | T | T | T | T | T | T | T | T | T | T | T | T | T | T | T | A | A | A |
| ENSRNOSNP2784516 | J634672                             | 183900353 | T | G | G | G | G | G | G | G | G | G | G | G | G | G | G | G | G | G | G | T | T | T |
| ENSRNOSNP2784517 | SHRSPc41g07_r1_426                  | 184360555 | C | - | T | T | T | T | T | T | T | T | T | T | T | T | T | T | T | T | T | C | C | C |
| ENSRNOSNP2784518 | J685120                             | 184391827 | G | T | T | T | T | T | T | T | T | T | T | T | T | T | T | T | T | T | T | G | G | G |
| ENSRNOSNP2784519 | J660716                             | 184517563 | T | C | C | C | C | C | C | C | C | C | C | C | C | C | C | C | C | C | - | T | T | T |
| ENSRNOSNP2784520 | rat104_006_b07.q1ca_390             | 184629593 | T | A | A | A | A | A | A | A | A | A | A | A | A | A | A | A | A | A | A | T | T | T |
| ENSRNOSNP2784521 | DS-g-c-15b01_f1_315                 | 184681859 | A | G | G | G | G | G | G | G | G | G | G | G | G | G | G | G | G | G | G | A | A | A |
| ENSRNOSNP2784522 | rat104_043_h23.q1ca_244             | 184702022 | G | A | A | A | A | A | G | A | G | G | G | G | A | G | G | G | G | G | G | G | G | G |
| ENSRNOSNP2784523 | J649513                             | 184874718 | A | G | G | G | G | G | G | G | G | G | G | G | G | G | G | G | G | G | - | A | A | A |
| ENSRNOSNP2784524 | Cpn_1184935644                      | 184935644 | G | C | C | C | C | C | C | C | C | C | C | C | C | C | C | C | C | - | C | G | G | G |
| ENSRNOSNP2784525 | WKYc33g07_s1_244                    | 184995554 | G | T | T | T | T | T | G | T | G | G | G | G | T | - | G | G | G | G | G | G | G | G |
| ENSRNOSNP2784526 | J681607                             | 185195584 | C | C | C | C | C | C | T | C | T | T | T | T | C | T | T | T | T | T | - | C | C | C |
| ENSRNOSNP2784527 | J339456                             | 185299237 | A | G | G | G | G | G | G | G | G | G | G | G | G | G | G | G | G | G | G | A | A | A |
| ENSRNOSNP2784528 | gko-5513_rp2_b1_77                  | 185341704 | C | A | A | A | A | A | C | A | C | C | C | C | A | C | C | C | C | C | C | A | A | A |
| ENSRNOSNP2784529 | J494466                             | 185413648 | G | G | G | G | G | G | G | G | G | G | G | G | G | G | G | G | G | G | - | A | A | A |
| ENSRNOSNP2784530 | J560889                             | 185541630 | G | G | G | G | G | G | A | G | A | A | A | A | G | A | A | A | A | A | - | A | A | A |
| ENSRNOSNP2784531 | rat104_061_116.q1ca_474             | 185546033 | T | C | C | C | C | C | C | C | C | C | C | C | C | C | C | C | C | C | C | C | C | C |
| ENSRNOSNP2784532 | Cpn_1185633136                      | 185633136 | C | C | C | C | C | C | T | C | T | T | T | T | C | T | T | T | T | T | T | T | T | T |
| ENSRNOSNP2784533 | rat101_017_b19.p1cb_362             | 185692567 | T | T | T | T | T | T | T | T | T | T | T | T | T | T | T | T | T | T | T | T | T | T |
| ENSRNOSNP2784534 | J507596                             | 185762321 | A | A | A | A | A | A | A | A | A | A | A | A | A | A | A | A | A | A | A | G | G | G |
| ENSRNOSNP2784535 | rat101_017_a06.q1ca_391             | 185853325 | T | C | C | C | C | C | C | C | C | C | C | C | C | C | C | C | C | C | C | T | T | T |
| ENSRNOSNP2784536 | J877779                             | 185950950 | G | G | G | G | G | G | G | A | G | G | G | G | G | A | A | A | A | A | - | G | G | G |
| ENSRNOSNP2784537 | WKYQa28f12_s1_242                   | 186055581 | T | C | C | C | C | C | C | T | C | C | C | C | C | T | T | T | T | T | T | T | T | T |
| ENSRNOSNP2784538 | rat104_054_g07.q1cb_456             | 186165480 | C | G | G | G | G | G | G | C | G | G | G | G | G | C | C | C | C | C | C | C | C | C |
| ENSRNOSNP2784539 | J549925                             | 186168275 | A | A | A | A | A | A | A | G | A | A | A | A | A | G | G | G | G | G | G | G | G | G |
| ENSRNOSNP2784541 | J877866                             | 186368264 | C | C | C | C | C | C | C | C | G | C | C | C | C | C | G | G | G | G | - | C | C | C |
| ENSRNOSNP2784542 | rdahl-101f23_fp2_b1_279             | 186370915 | A | - | A | A | A | A | A | A | G | A | A | A | A | A | G | G | G | G | G | A | A | A |
| ENSRNOSNP2784543 | J551745                             | 186529653 | T | T | T | T | T | T | T | T | T | T | T | T | T | T | T | T | T | T | T | C | C | C |
| ENSRNOSNP2784544 | Cpn_1186535990                      | 186535990 | A | A | A | A | A | A | A | A | T | A | A | A | A | A | T | T | T | T | T | A | A | A |
| ENSRNOSNP2784545 | rat104_064_e09.q1ca_133             | 186684588 | G | T | T | T | T | T | T | G | T | T | T | T | T | G | G | G | G | G | G | T | T | T |



|                  |                                     |           |   |   |   |   |   |   |   |   |   |   |   |   |   |   |   |   |   |   |   |   |   |   |   |   |   |   |   |   |   |   |
|------------------|-------------------------------------|-----------|---|---|---|---|---|---|---|---|---|---|---|---|---|---|---|---|---|---|---|---|---|---|---|---|---|---|---|---|---|---|
| ENSRNOSNP2784585 | rat109_045_g06.q1ca_639             | 189924824 | G | T | T | T | T | T | T | T | G | T | T | T | T | T | T | T | T | T | T | T | T | T | T | T | T | T | G | G | G |   |
| ENSRNOSNP2784586 | Cpn_1190079641                      | 190079641 | C | T | T | T | T | T | T | T | C | T | T | T | T | T | T | T | T | T | T | T | T | T | T | T | T | T | T | C | C | C |
| ENSRNOSNP2784588 | WKYc36d10_s1_327                    | 190281302 | T | C | C | C | C | C | C | C | T | C | C | C | C | C | C | C | C | C | C | C | C | C | C | C | C | C | T | T | T |   |
| ENSRNOSNP2784589 | J1265920                            | 190335449 | A | G | G | G | G | G | G | G | A | G | G | G | G | G | G | G | G | G | G | G | - | A | A | A | A | A | A | A | A |   |
| ENSRNOSNP2784590 | J339481                             | 191124400 | C | T | T | T | T | T | T | T | C | T | T | T | T | T | T | T | T | T | T | T | T | T | T | T | T | T | C | C | C |   |
| ENSRNOSNP2784591 | rat108_007_a02.q1cb_498             | 191139811 | C | T | T | T | T | T | T | T | C | T | T | T | T | T | T | T | T | T | T | T | T | T | T | T | T | T | C | C | C |   |
| ENSRNOSNP2784592 | J700198                             | 191233659 | T | T | T | T | T | T | T | T | T | T | T | T | T | T | T | T | T | T | T | T | T | - | T | T | T | T | T | T | T |   |
| ENSRNOSNP2784593 | WKYa71f05_s1_175                    | 191240400 | A | G | G | G | G | G | G | G | A | G | G | G | G | G | G | G | G | G | G | G | G | G | G | G | G | A | A | A |   |   |
| ENSRNOSNP2784594 | J337899                             | 191477586 | C | T | T | T | T | T | T | T | C | T | T | T | T | T | T | T | T | T | T | T | T | T | T | T | T | T | C | C | C |   |
| ENSRNOSNP2784595 | Cpn_1191511911                      | 191511911 | A | G | G | G | G | G | G | G | A | G | G | G | G | G | G | G | G | G | G | G | G | G | G | G | G | G | G | G | G |   |
| ENSRNOSNP2784596 | J336735                             | 191643847 | G | T | T | T | T | T | T | T | G | T | T | T | T | T | T | T | T | T | T | T | T | - | G | G | G | G | G | G | G |   |
| ENSRNOSNP2784597 | J636872                             | 191818813 | G | G | G | G | G | G | G | G | G | G | G | G | G | G | G | G | G | G | G | G | G | G | G | G | G | G | G | G | G |   |
| ENSRNOSNP2784598 | rdahl-57e18_fp2_b1_350              | 191854465 | T | T | T | T | T | T | T | T | T | T | T | T | T | T | T | T | T | T | T | T | T | T | T | T | T | T | C | C | C |   |
| ENSRNOSNP2784599 | Cpn_1192177195                      | 192027314 | A | G | G | G | G | G | G | G | A | G | G | G | G | G | G | G | G | G | G | G | G | G | G | G | G | A | A | A |   |   |
| ENSRNOSNP2784600 | gko-99p5_rp2_b1_273                 | 192548657 | A | A | A | A | A | A | A | A | A | A | A | A | A | A | A | A | A | A | A | A | A | A | A | A | A | G | G | G |   |   |
| ENSRNOSNP2784601 | gko-10518_fp2_b1_438                | 192700265 | G | G | G | G | G | G | G | G | G | G | G | G | G | G | G | G | G | G | G | G | G | G | G | G | G | A | A | A |   |   |
| ENSRNOSNP2784602 | SHRSPa25b10_s1_297                  | 193106681 | T | C | C | C | C | C | C | C | C | C | C | C | C | C | C | C | C | C | C | C | C | C | C | C | T | T | T |   |   |   |
| ENSRNOSNP2784603 | DS-g-a-40h12_f1_36                  | 193174911 | G | A | A | A | A | A | A | A | A | A | A | A | A | A | A | A | A | A | A | A | A | A | A | A | A | A | A | A | A |   |
| ENSRNOSNP2784604 | Cpn_1193218073                      | 193218073 | A | A | A | A | A | A | A | A | A | A | A | A | A | A | A | A | A | A | A | A | A | A | A | A | A | A | A | A | A |   |
| ENSRNOSNP2784605 | rat108_018_c13.p1ca_659             | 193221647 | T | C | C | C | C | C | C | C | C | C | C | C | C | C | C | C | C | C | C | C | C | C | C | C | T | T | T |   |   |   |
| ENSRNOSNP2784606 | WKYc48c06_s1_510                    | 193248816 | G | A | A | A | A | A | - | A | A | A | - | A | A | A | A | A | A | A | A | A | A | A | A | A | G | G | G |   |   |   |
| ENSRNOSNP2784607 | J530958                             | 193271919 | G | G | G | G | G | G | G | G | G | G | G | G | G | G | G | G | G | G | G | G | G | G | G | G | - | A | A | A |   |   |
| ENSRNOSNP2784608 | J342520                             | 193363363 | A | G | G | G | G | G | G | G | G | G | G | G | G | G | G | G | G | G | G | G | G | G | G | G | - | G | G | G |   |   |
| ENSRNOSNP2784609 | SHRSPa92d07_r1_562                  | 193421868 | T | C | C | C | C | C | C | C | C | C | C | C | C | C | C | C | C | C | C | C | C | C | C | C | T | T | T |   |   |   |
| ENSRNOSNP2784610 | WKY-G-i-06b06_r1_435                | 193659821 | G | A | A | A | A | A | A | A | A | A | A | A | A | A | A | A | A | A | A | A | A | A | A | A | A | G | G | G |   |   |
| ENSRNOSNP2784611 | J638588                             | 193790344 | C | G | G | G | G | G | G | G | G | G | G | G | G | G | G | G | G | G | G | G | G | G | G | - | C | C | C |   |   |   |
| ENSRNOSNP2784612 | rat102_037_n14.q1ca_449             | 194003410 | C | T | T | T | T | T | T | T | C | T | T | T | T | T | T | T | T | T | T | T | T | T | T | T | T | C | C | C |   |   |
| ENSRNOSNP2784613 | rat102_037_n14.q1ca_296             | 194003563 | A | G | G | G | G | G | G | G | A | G | G | G | G | G | G | G | G | G | G | G | G | G | G | G | A | A | A |   |   |   |
| ENSRNOSNP2784614 | J660444                             | 194026392 | C | T | T | T | T | T | T | T | - | T | T | T | T | T | T | T | T | T | T | T | T | T | T | - | C | C | C |   |   |   |
| ENSRNOSNP2784615 | DS-g-a-18a01_f1_367                 | 194127234 | G | G | G | G | G | G | G | G | G | G | G | G | G | G | G | G | G | G | G | G | G | G | G | G | G | G | G | G |   |   |
| ENSRNOSNP2784616 | gnl ti 896732648_19866867002799_277 | 194505012 | C | C | C | C | C | C | C | C | C | C | C | C | C | C | C | C | C | C | C | C | C | C | C | C | C | C | C | C |   |   |
| ENSRNOSNP2784617 | J645768                             | 194668536 | C | C | C | C | C | C | C | C | C | C | C | C | C | C | C | C | C | C | C | C | C | C | C | C | C | C | C | C |   |   |
| ENSRNOSNP2784618 | gnl ti 896949457_19866867454870_329 | 194673191 | A | A | A | A | A | A | A | A | A | A | A | A | A | A | A | A | A | A | A | A | A | A | A | A | A | A | A | A |   |   |
| ENSRNOSNP2784619 | J567166                             | 194778386 | A | A | A | A | A | A | A | A | A | A | A | A | A | A | A | A | A | A | A | A | A | A | A | - | C | C | C |   |   |   |
| ENSRNOSNP2784620 | J1271754                            | 195088727 | G | A | A | - | A | A | - | A | - | A | A | A | A | - | A | A | A | A | - | A | A | A | A | - | G | A | G | G |   |   |
| ENSRNOSNP2784621 | Cpn_1195132894                      | 195132894 | T | C | C | C | C | C | C | C | C | C | C | C | C | C | C | C | C | C | C | C | C | C | C | C | T | T | T |   |   |   |
| ENSRNOSNP2784622 | J1296994                            | 195200656 | A | G | G | G | G | G | G | G | - | G | G | G | G | G | G | G | G | G | G | G | G | G | - | G | G | G | G | G |   |   |
| ENSRNOSNP2784623 | gnl ti 896916708_19866868309411_282 | 195273115 | C | - | C | - | C | C | C | C | C | C | - | C | C | C | C | C | C | C | C | C | C | C | C | C | C | C | C | C |   |   |
| ENSRNOSNP2784624 | J527132                             | 195298379 | G | A | A | A | A | A | A | A | G | A | A | A | A | A | A | A | A | A | A | A | A | A | - | A | A | A | A | A |   |   |







|                  |                         |           |   |   |   |   |   |   |   |   |    |   |   |   |    |   |   |   |   |   |   |    |   |    |   |
|------------------|-------------------------|-----------|---|---|---|---|---|---|---|---|----|---|---|---|----|---|---|---|---|---|---|----|---|----|---|
| ENSRNOSNP2784706 | rat104_020_e15.q1ca_314 | 203858375 | G | A | A | A | A | A | A | A | A  | A | A | A | A  | A | A | A | A | A | A |    |   |    |   |
| ENSRNOSNP2784707 | J1275564                | 203871259 | A | G | G | G | G | G | G | G | A  | G | G | G | G  | A | G | G | G | G | G | -  | G | G  | G |
| ENSRNOSNP2784708 | Cpn_1203891431          | 203891431 | G | T | T | T | T | T | T | T | G  | T | T | T | G  | T | T | T | T | T | T | T  | T | T  | T |
| ENSRNOSNP2784709 | rat104_077_a02.q1ca_162 | 203934819 | G | A | A | A | A | A | A | A | G  | A | A | A | G  | A | A | A | A | A | A | A  | A | A  | A |
| ENSRNOSNP2784710 | rat103_024_i04.p1ca_500 | 204066186 | G | G | G | G | G | G | G | G | A  | G | G | G | A  | G | G | G | G | G | G | G  | G | G  | G |
| ENSRNOSNP2784711 | rat103_012_o11.p1ca_90  | 204187969 | C | A | A | A | A | A | A | A | A  | A | A | A | A  | A | A | A | A | A | A | A  | A | A  | A |
| ENSRNOSNP2784712 | rat110_007_i20.q1cb_742 | 204258191 | G | A | A | A | A | A | A | A | G  | A | A | A | G  | A | A | A | A | A | A | A  | A | A  | A |
| ENSRNOSNP2784713 | rat110_017_o14.q1ca_395 | 204258541 | G | A | A | A | A | A | A | A | G  | A | A | A | G  | A | A | A | A | A | A | A  | A | A  | A |
| ENSRNOSNP2784714 | J562698                 | 204270162 | A | G | G | G | G | G | G | G | G  | G | G | G | G  | G | G | G | G | G | G | -  | G | G  | G |
| ENSRNOSNP2784715 | WKYOa01b03_r1_818       | 204324576 | G | A | A | A | A | A | A | A | G  | A | A | A | G  | A | A | A | A | A | A | A  | A | A  | A |
| ENSRNOSNP2784716 | J581488                 | 204391572 | A | G | G | G | G | G | G | G | A  | G | G | G | A  | G | G | G | G | G | G | G  | G | G  | G |
| ENSRNOSNP2784717 | gko-34e12_rp2_b1_147    | 204573537 | C | T | T | T | T | T | T | T | C  | T | T | T | C  | T | T | T | T | T | T | T  | T | T  |   |
| ENSRNOSNP2784718 | SHRSPc52d06_s1_444      | 204793594 | T | C | C | C | C | C | C | C | C  | C | C | C | C  | C | C | C | C | C | C | C  | C | C  |   |
| ENSRNOSNP2784719 | rat108_042_h04.p1cb_350 | 204878579 | A | C | C | C | C | C | C | C | A  | C | C | C | A  | C | C | C | C | C | C | C  | C | C  |   |
| ENSRNOSNP2784720 | J468482                 | 205041917 | A | G | G | G | G | G | G | G | G  | G | G | G | G  | G | G | G | G | G | G | -  | G | G  | G |
| ENSRNOSNP2784721 | gko-18d13_rp2_b1_157    | 205216272 | A | - | A | A | A | A | A | A | G  | A | A | A | G  | A | A | A | A | A | A | A  | G | G  | G |
| ENSRNOSNP2784722 | J517612                 | 205376613 | T | T | T | - | T | T | - | T | TC | T | T | T | TC | - | T | T | T | T | - | TC | C | TC |   |
| ENSRNOSNP2784723 | WKY-G-j-12a09_f1_1130   | 205671704 | T | C | C | C | C | C | C | C | C  | C | C | C | C  | C | C | C | C | C | C | C  | T | T  | T |
| ENSRNOSNP2784724 | J544198                 | 205733521 | T | T | T | T | T | T | T | T | C  | T | T | T | C  | T | T | T | T | T | T | T  | C | C  | C |
| ENSRNOSNP2784725 | rat106_017_o23.q1ca_142 | 205759970 | C | C | C | C | C | C | C | C | A  | C | C | C | A  | C | C | C | C | C | C | C  | A | A  | A |
| ENSRNOSNP2784726 | gko-79m3_rp2_b1_52      | 206245790 | G | G | G | G | G | G | G | G | G  | G | G | G | G  | G | G | G | G | G | G | G  | A | A  | A |
| ENSRNOSNP2784727 | gko-21a12_fp2_b1_165    | 206413402 | T | T | T | T | T | T | T | T | G  | T | T | T | G  | T | T | T | T | T | T | T  | G | G  | G |
| ENSRNOSNP2784728 | J594050                 | 206552616 | C | C | C | C | C | C | C | C | C  | C | C | C | C  | C | C | C | C | C | C | -  | G | G  | G |
| ENSRNOSNP2784729 | Cpn_1206682156          | 206682156 | G | G | G | G | G | G | G | G | A  | G | G | G | A  | G | G | G | G | G | G | G  | G | G  | G |
| ENSRNOSNP2784730 | rat013_028_h13.q1ca_705 | 206800577 | T | T | T | T | T | T | T | T | A  | T | T | T | A  | T | T | T | T | T | T | T  | T | T  | T |
| ENSRNOSNP2784731 | rat107_026_k13.p1ca_310 | 206816789 | G | G | G | G | G | G | G | G | A  | G | G | G | A  | G | G | G | G | G | G | G  | A | A  | A |
| ENSRNOSNP2784732 | J579069                 | 206878409 | C | C | C | C | C | C | C | C | C  | C | C | C | C  | C | C | C | C | C | C | C  | T | T  | T |
| ENSRNOSNP2784733 | rat103_041_f02.q1ca_544 | 207000773 | G | G | G | G | G | G | G | G | A  | G | G | G | A  | G | G | G | G | G | G | G  | A | A  | A |
| ENSRNOSNP2784734 | J519024                 | 207066536 | C | C | C | C | C | C | C | C | C  | C | C | C | C  | C | C | C | C | C | C | -  | T | T  | T |
| ENSRNOSNP2784735 | J541152                 | 207171392 | A | A | A | A | A | A | A | A | G  | A | A | A | G  | A | A | A | A | A | A | -  | G | G  | G |
| ENSRNOSNP2784736 | Cpn_1207450582          | 207450582 | G | G | G | G | G | G | G | G | A  | G | G | G | A  | G | G | - | G | G | G | G  | G | G  | G |
| ENSRNOSNP2784737 | rat106_025_f16.p1ca_195 | 207503859 | C | C | C | C | C | C | C | C | T  | C | C | C | T  | C | C | C | C | C | C | C  | C | C  | C |
| ENSRNOSNP2784738 | rat105_019_j14.p1ca_275 | 207546592 | C | C | C | C | C | C | C | C | A  | C | C | C | A  | C | C | C | C | C | C | C  | C | C  | C |
| ENSRNOSNP2784739 | rat103_002_i01.p1ma_346 | 207659997 | A | A | A | A | A | A | A | A | G  | A | A | A | G  | A | A | A | A | A | A | A  | G | G  | G |
| ENSRNOSNP2784741 | J469256                 | 207715030 | A | A | A | - | A | A | - | A | A  | A | A | A | A  | - | A | A | A | A | - | G  | G | G  | G |
| ENSRNOSNP2784742 | rat105_008_d14.q1cb_380 | 207991933 | T | T | T | T | T | T | T | T | G  | T | T | T | G  | T | T | T | T | T | T | T  | G | G  | G |
| ENSRNOSNP2784743 | rat103_036_e09.p1ca_64  | 208010733 | T | T | T | T | T | T | T | T | C  | T | T | T | C  | T | T | T | T | T | T | T  | C | C  | C |
| ENSRNOSNP2784744 | J523349                 | 208029058 | C | - | C | - | C | A | - | - | -  | C | C | C | -  | - | - | C | - | - | - | -  | C | C  | C |
| ENSRNOSNP2784745 | gko-89f18_fp2_b1_229    | 208045208 | C | C | C | C | C | C | C | C | C  | C | C | C | C  | C | C | C | C | C | C | C  | T | T  | T |





|                  |                                     |           |   |    |   |   |   |    |    |   |    |   |   |   |    |   |   |   |    |    |   |   |   |   |
|------------------|-------------------------------------|-----------|---|----|---|---|---|----|----|---|----|---|---|---|----|---|---|---|----|----|---|---|---|---|
| ENSRNOSNP2784833 | DS-g-a-38g08_r1_491                 | 222249801 | C | C  | C | C | C | C  | T  | C | C  | T | T | T | C  | T | C | C | C  | C  | - | T | T | T |
| ENSRNOSNP2784834 | SHRSPa43h04_s1_819                  | 222478178 | T | C  | C | C | C | C  | T  | C | C  | T | T | T | C  | T | C | C | C  | C  | C | C | C | C |
| ENSRNOSNP2784835 | J596140                             | 223093095 | A | -  | A | - | A | A  | T  | - | -  | - | A | A | A  | - | - | - | A  | A  | A | - | A | A |
| ENSRNOSNP2784836 | SHRSPc33f05_r1_338                  | 223127353 | G | C  | C | C | C | C  | C  | C | C  | G | G | G | C  | G | C | C | C  | C  | C | C | C | C |
| ENSRNOSNP2784837 | J506310                             | 223188441 | A | C  | C | - | C | C  | -  | C | C  | C | C | C | C  | - | C | C | C  | C  | - | C | C | C |
| ENSRNOSNP2784838 | J1260586                            | 223474188 | C | T  | T | T | T | T  | T  | T | T  | C | C | C | T  | C | T | T | T  | T  | T | T | T | T |
| ENSRNOSNP2784839 | J482894                             | 223704445 | C | T  | T | T | T | T  | T  | T | T  | C | C | C | T  | C | T | T | T  | T  | - | T | T | T |
| ENSRNOSNP2784840 | gnl ti 896840146_19866867170110_323 | 223710972 | T | A  | A | A | A | A  | A  | A | A  | T | T | T | A  | T | A | A | A  | A  | A | A | A | A |
| ENSRNOSNP2784841 | J559161                             | 223814404 | G | A  | A | A | A | A  | A  | A | A  | A | A | A | A  | A | A | A | A  | A  | A | A | A | A |
| ENSRNOSNP2784842 | gnl ti 896828697_19866868382869_454 | 223864981 | A | G  | G | G | G | G  | G  | G | G  | G | G | G | G  | G | G | G | G  | G  | G | G | G | G |
| ENSRNOSNP2784843 | J574278                             | 223948650 | C | A  | A | A | A | A  | A  | A | A  | A | A | A | A  | A | A | A | A  | A  | A | - | C | A |
| ENSRNOSNP2784844 | J527939                             | 224128466 | G | C  | C | C | C | C  | C  | C | C  | G | G | G | C  | G | C | C | C  | C  | C | C | G | C |
| ENSRNOSNP2784845 | gnl ti 896607033_19866866956703_245 | 224216155 | G | T  | T | T | T | T  | T  | T | T  | G | G | G | T  | G | T | T | T  | T  | T | T | G | T |
| ENSRNOSNP2784846 | J528500                             | 224226608 | A | G  | G | G | G | G  | G  | G | G  | A | A | A | G  | A | G | G | G  | G  | - | A | G | G |
| ENSRNOSNP2784847 | J679686                             | 224339653 | C | G  | G | G | G | G  | G  | G | G  | C | C | C | G  | C | G | G | G  | G  | - | C | G | G |
| ENSRNOSNP2784848 | gko-17c4_rp2_b1_643                 | 224377627 | A | C  | C | C | C | C  | C  | C | C  | A | A | A | C  | A | C | C | C  | C  | C | A | C | C |
| ENSRNOSNP2784849 | rat109_042_b24.q1ca_347             | 224450553 | C | T  | T | C | T | T  | CT | T | T  | C | C | C | T  | C | T | T | T  | T  | C | T | T | T |
| ENSRNOSNP2784850 | J876926                             | 224498444 | T | C  | C | C | C | C  | C  | C | C  | T | T | T | C  | T | C | C | C  | C  | - | T | C | C |
| ENSRNOSNP2784851 | gko-17a18_rp2_b1_736                | 224530235 | C | G  | G | G | G | G  | G  | G | G  | C | C | C | G  | C | G | G | G  | G  | G | C | G | G |
| ENSRNOSNP2784852 | J525939                             | 224740245 | T | C  | C | C | C | C  | C  | C | C  | C | C | C | C  | C | C | C | C  | C  | - | C | C | C |
| ENSRNOSNP2784853 | rat101_026_f17.q1ca_517             | 225073386 | A | G  | G | G | G | G  | G  | G | G  | G | G | G | G  | G | G | G | G  | G  | G | G | G | G |
| ENSRNOSNP2784854 | Cpn_1225096659                      | 225096659 | G | -  | T | T | T | T  | T  | T | T  | G | G | G | T  | G | T | T | -  | T  | T | G | T | T |
| ENSRNOSNP2784855 | DS-g-a-29b11_f1_39                  | 225292689 | C | C  | C | C | C | C  | C  | C | C  | C | C | C | C  | C | C | C | C  | C  | C | C | C | C |
| ENSRNOSNP2784856 | gko-61c14_fp2_b1_634                | 225467067 | C | T  | T | T | T | T  | T  | T | T  | T | T | T | T  | T | T | T | T  | T  | T | T | T | T |
| ENSRNOSNP2784857 | J658194                             | 225579245 | G | G  | G | G | G | G  | G  | G | G  | G | G | G | G  | G | G | G | G  | G  | - | G | G | G |
| ENSRNOSNP2784858 | gko-33i19_fp2_b1_113                | 225730889 | C | T  | T | T | T | T  | T  | T | T  | C | C | C | T  | C | T | T | T  | T  | T | C | T | T |
| ENSRNOSNP2784859 | J576143                             | 225788091 | C | T  | T | T | T | T  | T  | T | T  | T | T | T | T  | T | T | T | T  | T  | T | T | T | T |
| ENSRNOSNP2784860 | Cpn_1225978942                      | 225978942 | A | -  | A | A | A | A  | A  | A | A  | A | A | A | A  | A | A | A | A  | A  | A | A | A | A |
| ENSRNOSNP2784861 | J1260913                            | 226097882 | T | TC | C | C | C | TC | C  | - | TC | T | T | T | TC | T | - | C | TC | TC | C | T | C | C |
| ENSRNOSNP2784862 | WKYc61d08_r1_454                    | 226148316 | C | T  | T | T | T | T  | T  | T | T  | C | C | C | C  | - | T | T | T  | T  | T | C | T | T |
| ENSRNOSNP2784863 | J473945                             | 226226832 | T | C  | C | C | C | C  | C  | C | C  | T | T | T | C  | T | C | C | C  | C  | - | T | C | C |
| ENSRNOSNP2784864 | rat101_039_h14.q1ca_398             | 226279794 | C | G  | G | G | G | G  | G  | G | G  | G | G | G | G  | G | G | G | G  | G  | G | C | G | G |
| ENSRNOSNP2784865 | SHRSPa56g02_r1_538                  | 226391086 | T | G  | G | G | G | G  | G  | G | G  | T | T | T | T  | T | G | G | G  | G  | G | T | T | T |
| ENSRNOSNP2784866 | WKYc16a05_s1_488                    | 226429326 | T | C  | C | C | C | C  | C  | C | C  | C | C | C | C  | C | C | C | C  | C  | C | T | T | T |
| ENSRNOSNP2784867 | rat106_003_f22.q1ca_142             | 226446443 | A | A  | A | A | A | A  | A  | A | A  | A | A | A | A  | A | A | A | A  | A  | A | A | A | A |
| ENSRNOSNP2784868 | gnl ti 896830637_19866868228151_299 | 226580639 | C | G  | G | G | G | G  | G  | G | G  | C | C | C | G  | C | G | G | G  | G  | G | C | C | C |
| ENSRNOSNP2784869 | J666471                             | 226640285 | A | A  | G | G | - | G  | A  | G | -  | A | A | G | G  | G | G | G | G  | -  | A | A | A | A |
| ENSRNOSNP2784870 | J341248                             | 226850093 | A | G  | G | G | G | G  | G  | G | G  | G | G | G | A  | G | G | G | G  | G  | - | G | A | A |
| ENSRNOSNP2784871 | gnl ti 896617915_19866867129164_382 | 227045735 | C | C  | C | C | C | C  | C  | C | C  | G | G | G | C  | G | C | C | C  | C  | C | G | C | C |





|                  |                         |           |   |   |   |   |   |   |    |    |   |   |   |   |   |   |   |   |   |   |   |    |    |    |    |
|------------------|-------------------------|-----------|---|---|---|---|---|---|----|----|---|---|---|---|---|---|---|---|---|---|---|----|----|----|----|
| ENSRNOSNP2784950 | J563567                 | 237021546 | C | C | C | C | C | C | C  | C  | C | T | T | T | C | C | C | C | C | C | - | T  | T  | T  |    |
| ENSRNOSNP2784951 | gko-97h11_rp2_b1_354    | 237148023 | C | A | C | C | C | A | C  | C  | A | A | A | A | A | C | A | A | A | A | A | A  | A  | A  |    |
| ENSRNOSNP2784952 | J491517                 | 237383999 | C | T | T | T | T | T | T  | T  | T | T | T | T | T | T | T | T | T | T | T | -  | T  | T  | T  |
| ENSRNOSNP2784953 | gko-104o17_fp2_b1_508   | 237469738 | T | C | C | C | C | C | C  | C  | C | C | C | C | C | C | C | C | C | C | C | C  | C  | C  | C  |
| ENSRNOSNP2784954 | WKYe09a09_r1_136        | 237503621 | T | C | C | C | C | C | C  | C  | C | C | C | C | C | C | C | C | C | C | C | C  | C  | C  | C  |
| ENSRNOSNP2784955 | WKY-G-i-44f06_f1_1430   | 237835559 | C | A | A | A | A | A | A  | A  | A | A | A | A | A | A | A | A | A | A | A | A  | A  | A  | A  |
| ENSRNOSNP2784956 | J488006                 | 237910637 | T | T | T | T | T | T | T  | T  | T | C | C | C | T | T | T | T | T | T | T | T  | TC | C  | TC |
| ENSRNOSNP2784957 | gko-27e7_rp2_b1_105     | 237978144 | A | A | A | A | A | A | A  | A  | A | C | C | C | A | A | A | A | A | A | A | A  | C  | C  | C  |
| ENSRNOSNP2784958 | J572328                 | 238479524 | A | A | A | A | A | A | A  | A  | A | T | T | T | A | A | A | A | A | A | A | -  | T  | T  | T  |
| ENSRNOSNP2784959 | rat104_013_k22.q1ca_686 | 238861117 | C | A | A | A | A | A | A  | A  | A | A | A | A | A | A | A | A | A | A | A | A  | A  | A  | A  |
| ENSRNOSNP2784960 | SHRSPc64a05_r1_121      | 238892832 | G | T | T | T | T | T | T  | T  | T | T | T | T | T | T | T | T | T | T | T | T  | T  | T  | T  |
| ENSRNOSNP2784961 | J598326                 | 239048791 | C | T | T | T | T | T | T  | T  | T | T | T | T | T | T | T | T | T | T | T | -  | T  | T  | T  |
| ENSRNOSNP2784962 | gko-108f14_rp2_b1_311   | 239048926 | A | G | G | G | G | G | G  | G  | G | G | G | G | G | G | G | G | G | G | G | G  | G  | G  | G  |
| ENSRNOSNP2784963 | J342461                 | 239161787 | C | A | A | A | A | A | A  | A  | A | A | A | A | A | A | A | A | A | A | A | -  | A  | A  | A  |
| ENSRNOSNP2784964 | SHRSPc10g01_s2_205      | 239812380 | G | A | A | A | A | A | A  | A  | A | G | G | G | A | A | A | A | A | A | A | A  | G  | G  | G  |
| ENSRNOSNP2784965 | rat101_015_m05.plca_544 | 240135307 | G | A | A | A | A | A | A  | A  | A | A | A | A | A | A | A | A | A | A | A | A  | A  | A  | A  |
| ENSRNOSNP2784966 | J1300459                | 240425135 | A | G | G | G | G | G | G  | G  | G | A | A | A | G | G | G | G | G | G | G | -  | A  | A  | A  |
| ENSRNOSNP2784967 | gko-18c21_rp2_b1_62     | 240506905 | C | C | C | C | C | C | C  | CT | C | T | T | T | C | C | C | C | C | C | C | C  | T  | T  | T  |
| ENSRNOSNP2784968 | J474918                 | 240576215 | A | T | T | T | T | T | T  | T  | T | T | T | T | T | T | T | T | T | T | T | T  | T  | T  | T  |
| ENSRNOSNP2784969 | WKYOa42g04_r1_262       | 240673620 | G | T | T | T | T | T | T  | T  | T | T | T | T | T | T | T | T | T | T | T | T  | T  | T  | T  |
| ENSRNOSNP2784970 | SHRSPc10b09_s2_124      | 240766152 | G | A | A | A | A | A | A  | A  | A | G | G | G | A | A | A | A | A | A | A | A  | G  | G  | G  |
| ENSRNOSNP2784971 | rat104_028_b17.q1ca_305 | 240839725 | C | T | T | T | T | T | T  | T  | T | C | C | C | T | T | T | T | T | T | T | T  | C  | C  | C  |
| ENSRNOSNP2784972 | SHRSPc52e03_r1_432      | 240928043 | G | A | A | A | A | A | A  | A  | A | G | G | G | A | A | A | A | A | A | A | A  | G  | G  | G  |
| ENSRNOSNP2784973 | Cpn_1240992368          | 240992368 | C | T | T | T | T | T | T  | T  | T | T | T | T | T | T | T | T | T | T | T | T  | T  | T  | T  |
| ENSRNOSNP2784975 | Cpn_1241639040          | 241639040 | T | T | T | T | T | T | T  | T  | T | C | C | C | T | T | T | T | T | T | T | T  | C  | -  | -  |
| ENSRNOSNP2784976 | WKYc72b11_s1_461        | 242263558 | T | A | A | A | A | A | A  | A  | A | A | A | A | A | A | A | A | A | A | A | A  | A  | A  | A  |
| ENSRNOSNP2784977 | J697156                 | 242329444 | C | C | C | C | C | C | C  | C  | C | T | T | T | C | C | C | C | C | C | - | T  | T  | T  |    |
| ENSRNOSNP2784978 | J503759                 | 242418966 | G | A | G | - | G | A | -  | -  | A | A | A | A | G | - | - | G | A | A | - | A  | A  | A  | A  |
| ENSRNOSNP2784979 | Cpn_1242637435          | 242444039 | G | G | G | G | G | G | G  | G  | G | G | G | G | G | G | G | G | G | G | G | G  | G  | G  | G  |
| ENSRNOSNP2784980 | J595364                 | 242551679 | T | T | T | T | T | T | T  | T  | T | C | C | C | T | T | T | T | T | T | - | C  | C  | C  |    |
| ENSRNOSNP2784981 | gko-67a10_rp2_b1_301    | 242599651 | T | T | T | T | T | T | T  | T  | T | A | A | A | T | T | T | T | T | T | T | A  | A  | A  | A  |
| ENSRNOSNP2784982 | J551759                 | 243881365 | C | C | C | - | C | C | -  | C  | C | C | C | C | C | - | C | C | C | C | - | CT | T  | CT |    |
| ENSRNOSNP2784983 | J655226                 | 244519462 | A | A | A | A | A | A | A  | A  | A | T | T | T | A | A | A | A | A | A | - | A  | A  | A  | A  |
| ENSRNOSNP2784984 | J632995                 | 244621903 | T | T | T | - | T | T | -  | T  | T | C | C | C | T | - | T | T | T | T | - | T  | T  | T  | T  |
| ENSRNOSNP2784985 | J468480                 | 244723523 | G | G | G | G | G | G | G  | G  | G | A | A | A | G | G | G | G | G | G | - | A  | A  | A  | A  |
| ENSRNOSNP2784986 | Cpn_1245301605          | 245301605 | T | T | T | T | T | T | TC | T  | T | C | C | C | T | T | T | T | T | T | T | T  | C  | C  | C  |
| ENSRNOSNP2784987 | J671394                 | 245348611 | G | C | G | G | G | C | G  | -  | C | G | G | G | - | G | - | G | - | C | G | G  | C  | G  | G  |
| ENSRNOSNP2784988 | Cpn_1245350235          | 245350235 | A | A | A | A | A | A | A  | A  | A | A | A | A | A | A | A | A | A | A | A | A  | A  | A  | A  |
| ENSRNOSNP2784989 | rat109_024_e21.q1ca_332 | 245413465 | A | C | C | C | C | C | C  | C  | A | A | A | A | C | C | C | C | C | C | C | A  | A  | A  | A  |

|                  |                         |           |   |   |   |   |   |   |   |   |   |   |   |   |   |   |   |   |   |    |   |   |   |   |   |   |   |
|------------------|-------------------------|-----------|---|---|---|---|---|---|---|---|---|---|---|---|---|---|---|---|---|----|---|---|---|---|---|---|---|
| ENSRNOSNP2784990 | rat102_001_b02.p1ca_544 | 245418191 | T | C | C | C | C | C | C | C | C | C | C | C | C | C | C | C | C | C  | T | T | T |   |   |   |   |
| ENSRNOSNP2784991 | Cpn_1245418564          | 245418564 | C | - | T | T | C | T | T | T | T | T | C | C | C | T | - | T | T | CT | T | C | T | C | C | C |   |
| ENSRNOSNP2784992 | rat102_018_o15.p1ca_117 | 245418921 | G | T | T | T | T | T | T | T | T | T | G | G | G | T | T | T | T | T  | T | T | T | G | G | G |   |
| ENSRNOSNP2784993 | rat108_001_j01.q1ca_703 | 245686574 | T | C | C | C | C | C | C | C | C | C | C | C | C | C | C | C | C | C  | C | C | C | T | T | T |   |
| ENSRNOSNP2784994 | SHRSPc08h12_r1_470      | 245691446 | A | G | G | G | G | G | G | G | G | G | A | A | A | G | G | G | G | G  | G | G | G | A | - | - |   |
| ENSRNOSNP2784995 | rat108_031_b04.q1ca_198 | 245725606 | A | G | G | G | G | G | G | G | G | G | G | G | G | G | G | G | G | G  | G | G | G | A | A | A |   |
| ENSRNOSNP2784996 | J1305629                | 245763299 | A | G | G | G | G | G | G | G | G | G | G | G | G | G | G | G | G | G  | G | G | G | A | A | A |   |
| ENSRNOSNP2784997 | J682298                 | 245886655 | G | G | G | G | G | G | G | G | G | G | G | G | G | G | G | G | G | G  | G | G | G | - | A | A | A |
| ENSRNOSNP2784998 | SHRSPc21h03_r1_724      | 245924574 | T | C | C | C | C | C | C | C | C | C | C | C | C | C | C | C | C | C  | C | C | C | T | T | T |   |
| ENSRNOSNP2784999 | WKYc21c09_s1_747        | 246010144 | G | A | A | A | A | A | A | A | A | A | - | A | A | A | A | A | A | A  | A | A | A | A | A | A | A |
| ENSRNOSNP2785000 | J691977                 | 246033390 | G | G | G | G | G | G | G | G | G | G | G | G | G | G | G | G | G | G  | G | G | G | - | A | A | A |
| ENSRNOSNP2785001 | J562377                 | 246145270 | G | G | G | - | G | - | - | - | G | C | G | G | G | - | - | - | G | -  | G | C | - | G | C | G | G |
| ENSRNOSNP2785002 | SHRSPc11g10_s2_236      | 246189919 | T | C | C | C | C | C | C | C | C | C | C | C | C | C | C | C | C | C  | C | C | C | T | T | T |   |
| ENSRNOSNP2785003 | WKYe11f03_r1_428        | 246261698 | A | G | G | G | G | G | G | G | G | G | G | G | G | G | G | G | G | G  | G | G | G | A | A | A |   |
| ENSRNOSNP2785004 | rat110_014_i18.p1ca_405 | 246412724 | G | A | A | A | A | A | A | A | A | A | A | A | A | A | A | A | A | A  | A | A | A | G | G | G |   |
| ENSRNOSNP2785005 | J654209                 | 246456731 | A | A | A | A | A | A | A | A | A | A | A | A | A | A | A | A | A | A  | A | A | A | T | T | T |   |
| ENSRNOSNP2785006 | DS-g-a-37c04_f1_201     | 246504030 | G | G | G | G | G | G | G | G | G | G | G | G | G | G | G | G | G | G  | G | G | G | A | A | A |   |
| ENSRNOSNP2785007 | rat106_020_a13.q1ca_430 | 246615233 | C | C | C | C | C | C | C | C | C | C | C | C | C | C | C | C | C | C  | C | C | C | A | A | A |   |
| ENSRNOSNP2785008 | rat106_020_a13.p1ca_77  | 246615541 | G | G | G | G | G | G | G | G | G | G | G | G | G | G | G | G | G | G  | G | G | G | A | A | A |   |
| ENSRNOSNP2785009 | J558948                 | 246623550 | C | C | C | C | C | C | C | C | C | C | C | C | C | C | C | C | C | C  | C | C | C | - | T | T | T |
| ENSRNOSNP2785010 | gko-71c18_fp2_b1_522    | 246757144 | G | G | G | G | G | G | G | G | G | G | G | G | G | G | G | G | G | G  | G | G | G | A | A | A |   |
| ENSRNOSNP2785011 | J583803                 | 246758778 | G | G | G | G | G | G | G | G | G | G | G | G | G | G | G | G | G | G  | G | G | G | A | A | A |   |
| ENSRNOSNP2785012 | rdahl-79m5_fp2_b1_231   | 246906744 | T | T | T | T | T | T | T | T | T | T | T | T | T | T | T | T | T | T  | T | T | T | C | C | C |   |
| ENSRNOSNP2785013 | J641134                 | 247068095 | T | C | C | C | C | C | C | C | C | C | C | C | C | C | C | C | C | C  | C | C | C | C | C | C | C |
| ENSRNOSNP2785014 | rat106_005_o04.p1ca_742 | 247093374 | A | - | - | - | - | - | - | A | G | G | G | G | G | G | G | G | G | G  | G | G | G | G | G | G | G |
| ENSRNOSNP2785015 | rat101_017_o02.q1ca_293 | 247171067 | G | A | A | A | A | A | A | A | A | A | A | A | A | A | A | A | A | A  | A | A | A | G | G | G |   |
| ENSRNOSNP2785016 | J483648                 | 247172158 | C | C | C | C | C | C | C | C | C | C | C | C | C | C | C | C | C | C  | C | C | C | - | T | T | T |
| ENSRNOSNP2785017 | J469697                 | 247326999 | T | C | C | - | C | C | - | C | C | C | C | C | C | C | - | C | C | C  | C | C | - | C | C | C |   |
| ENSRNOSNP2785018 | Cpn_1247347259          | 247347259 | A | G | G | G | G | G | G | G | G | G | G | G | G | G | G | G | G | G  | G | G | G | G | G | G | G |
| ENSRNOSNP2785019 | rat101_010_m22.q1ca_510 | 247350344 | A | G | G | G | G | G | G | G | G | G | G | G | G | G | G | G | G | G  | G | G | G | A | A | A |   |
| ENSRNOSNP2785020 | SHRSPc30g08_r1_304      | 247403219 | C | T | T | T | T | T | T | T | T | T | T | T | T | T | T | T | T | T  | T | T | T | C | C | C |   |
| ENSRNOSNP2785021 | gko-69a5_rp2_b1_122     | 247638201 | G | G | G | G | G | G | G | G | G | G | G | G | G | G | G | G | G | G  | G | G | G | A | A | A |   |
| ENSRNOSNP2785022 | J592374                 | 247736591 | T | A | A | A | - | A | A | - | A | A | A | A | A | A | - | A | A | A  | A | A | - | A | A | A |   |
| ENSRNOSNP2785023 | WKYc95d02_s1_305        | 247817588 | T | C | C | C | C | C | C | C | C | C | C | C | C | C | C | C | C | C  | C | C | C | C | C | C |   |
| ENSRNOSNP2785024 | J696336                 | 247929983 | T | C | C | C | C | C | C | C | C | C | C | C | C | C | C | C | C | C  | C | C | C | - | C | C | C |
| ENSRNOSNP2785025 | gko-69a22_rp2_b1_673    | 247958585 | A | G | G | G | G | G | G | G | G | G | G | G | G | G | G | G | G | G  | G | G | G | G | G | G | G |
| ENSRNOSNP2785026 | Cpn_1248118570          | 248118570 | A | A | A | A | A | A | A | A | A | A | A | A | A | A | A | A | A | A  | A | A | A | G | G | G |   |
| ENSRNOSNP2785027 | rat105_030_k01.q1cb_180 | 248121772 | C | C | C | C | C | C | C | C | C | C | C | C | C | C | C | C | C | C  | C | C | C | T | T | T |   |
| ENSRNOSNP2785028 | rat107_019_h02.q1ca_371 | 248140473 | C | C | C | C | C | C | C | C | C | C | C | C | C | C | C | C | C | C  | C | C | C | A | A | A |   |





|                  |                                     |           |   |   |   |   |   |   |   |   |   |   |   |   |   |   |   |   |   |   |   |   |   |   |
|------------------|-------------------------------------|-----------|---|---|---|---|---|---|---|---|---|---|---|---|---|---|---|---|---|---|---|---|---|---|
| ENSRNOSNP2785069 | rat108_035_e01.q1ca_144             | 251755814 | T | C | C | C | C | C | C | C | C | C | C | C | C | C | C | C | C | C | C | C |   |   |
| ENSRNOSNP2785070 | WKYc75c11_r1_62                     | 251758852 | A | T | T | T | T | T | T | T | T | T | T | T | T | T | T | T | T | T | T | T |   |   |
| ENSRNOSNP2785071 | J556031                             | 251876667 | T | C | C | C | C | C | C | C | C | C | C | C | C | C | C | C | C | - | C | C | C |   |
| ENSRNOSNP2785072 | gko-107d17_fp2_b1_464               | 251919957 | G | G | G | G | G | A | G | G | A | A | A | A | A | A | A | A | A | A | A | A |   |   |
| ENSRNOSNP2785073 | J668614                             | 251982463 | T | C | C | C | C | T | C | C | T | T | T | T | T | T | T | T | T | T | T | T |   |   |
| ENSRNOSNP2785074 | J572842                             | 252075188 | C | C | C | C | C | T | C | C | T | T | T | T | T | T | T | T | T | - | T | T | T |   |
| ENSRNOSNP2785075 | J651201                             | 252181230 | T | C | C | C | C | C | C | C | C | C | C | C | C | C | C | C | C | - | C | C | C |   |
| ENSRNOSNP2785076 | Cpn_1252197077                      | 252197077 | T | C | C | C | C | T | C | C | T | T | T | - | T | T | T | T | T | T | T | - | - |   |
| ENSRNOSNP2785077 | rat101_037_e13.p1ca_191             | 252201419 | A | G | G | G | G | G | G | G | G | G | G | G | G | G | G | G | G | G | G | G | G |   |
| ENSRNOSNP2785079 | rat101_001_o12.q1ca_300             | 252453603 | G | T | T | T | T | G | T | T | G | G | G | G | G | G | G | G | G | G | G | G | G |   |
| ENSRNOSNP2785080 | J877804                             | 252460516 | A | C | C | - | C | A | - | C | A | A | A | A | A | A | A | A | A | - | A | A | A |   |
| ENSRNOSNP2785081 | SHRSPc08c09_r1_712                  | 252511949 | C | G | G | G | G | G | G | G | G | G | G | G | G | G | G | G | G | G | G | G | G |   |
| ENSRNOSNP2785082 | WKYOa55f10_s1_199                   | 252657633 | G | A | A | - | A | G | A | A | G | G | G | G | G | G | G | - | G | G | G | G | G |   |
| ENSRNOSNP2785083 | J522384                             | 252661969 | G | G | G | G | G | A | G | G | A | A | A | G | A | A | A | A | A | A | A | A | A |   |
| ENSRNOSNP2785084 | J1271521                            | 252779708 | T | C | C | C | C | T | C | C | T | T | T | T | T | T | T | T | T | - | T | T | T |   |
| ENSRNOSNP2785085 | Cpn_1252871262                      | 252871262 | C | T | T | T | T | T | T | T | T | T | T | T | T | T | T | T | T | T | T | T | T |   |
| ENSRNOSNP2785086 | rat104_016_g10.q1ca_264             | 252875633 | G | A | A | A | A | G | A | A | G | G | G | G | G | G | G | G | G | G | G | G | G |   |
| ENSRNOSNP2785087 | rat013_054_i07.q1ca_232             | 252985998 | G | C | C | C | C | G | C | C | G | G | G | G | G | G | G | G | G | G | G | G | G |   |
| ENSRNOSNP2785088 | WKYc107b12_s1_229                   | 252995488 | G | A | A | A | A | A | A | A | A | A | A | - | A | A | A | A | A | A | A | A | A |   |
| ENSRNOSNP2785089 | J596912                             | 253011626 | C | C | C | C | C | T | C | T | T | T | T | T | T | T | T | T | T | T | T | T | T |   |
| ENSRNOSNP2785091 | SHRSPa25g10_s1_775                  | 253246042 | G | G | G | G | G | T | G | T | T | T | T | T | T | T | T | T | T | T | T | T | T |   |
| ENSRNOSNP2785092 | gko-6d5_rp2_b1_412                  | 253423962 | A | A | A | A | A | C | A | C | C | C | C | C | C | C | C | C | C | C | C | C | C |   |
| ENSRNOSNP2785093 | J649473                             | 253643590 | T | T | T | - | T | T | - | T | T | T | T | T | T | T | T | T | T | T | T | T | T |   |
| ENSRNOSNP2785094 | rdahl-33d6_fp2_b1_205               | 253644637 | T | T | T | T | T | C | T | C | C | C | C | C | C | C | C | C | C | C | C | C | C |   |
| ENSRNOSNP2785095 | J1269649                            | 253806438 | C | G | G | G | G | G | G | G | G | G | G | G | G | G | G | G | G | - | G | G | G |   |
| ENSRNOSNP2785096 | SHRSPc62h12_s1_272                  | 254209324 | T | T | T | T | - | C | T | C | C | C | C | C | C | C | C | C | C | C | C | T | T | T |
| ENSRNOSNP2785097 | gnl ti 896700629_19866867954014_268 | 254514369 | A | A | A | A | A | A | A | T | A | A | A | A | A | A | A | A | A | A | A | A | A |   |
| ENSRNOSNP2785098 | J677586                             | 254550790 | C | C | C | C | C | A | C | A | A | A | A | A | A | A | A | A | A | - | C | C | C |   |
| ENSRNOSNP2785099 | J636317                             | 254715527 | A | T | T | T | T | A | T | T | A | A | A | A | A | A | A | A | A | A | A | T | T | T |
| ENSRNOSNP2785100 | SHRSPc60h06_s1_517                  | 254824212 | C | C | C | C | C | C | C | T | T | T | T | T | C | T | T | T | T | T | T | C | C | C |
| ENSRNOSNP2785101 | J1264254                            | 254908544 | G | A | A | A | A | G | A | A | A | A | A | A | A | A | A | A | A | - | A | A | A |   |
| ENSRNOSNP2785102 | gnl ti 896616272_19866867247325_375 | 255259646 | G | G | G | G | G | G | A | G | G | G | G | A | G | G | G | G | G | G | G | G | G |   |
| ENSRNOSNP2785103 | J1273692                            | 255362995 | T | C | C | C | C | C | C | C | C | C | C | C | C | C | C | C | C | C | C | T | T | T |
| ENSRNOSNP2785104 | J1273298                            | 255666505 | A | G | G | G | G | G | G | G | A | A | A | A | A | A | A | A | A | A | A | G | G | G |
| ENSRNOSNP2785105 | gko-50g15_rp2_b1_254                | 255707762 | A | A | A | A | A | A | A | G | A | A | A | - | A | A | A | A | A | A | A | G | G | G |
| ENSRNOSNP2785106 | J1266955                            | 255757909 | A | G | G | G | G | G | G | G | G | G | G | G | G | G | G | G | G | G | - | G | G | G |
| ENSRNOSNP2785107 | rat101_015_o06.p1cb_144             | 255765717 | C | T | T | T | T | T | T | T | T | T | T | C | T | T | T | T | T | T | T | C | C | C |
| ENSRNOSNP2785108 | J664720                             | 255885332 | G | A | A | A | A | A | A | A | A | A | A | A | A | A | A | A | A | - | G | G | G |   |
| ENSRNOSNP2785109 | WKYc95b02_s1_448                    | 255933254 | A | G | G | G | G | G | G | G | G | G | G | G | G | G | G | G | G | G | G | A | A | A |

|                  |                                     |           |                 |                           |       |
|------------------|-------------------------------------|-----------|-----------------|---------------------------|-------|
| ENSRNOSNP2785110 | J568085                             | 255998182 | T T T T T T T C | T T T T T T T T           | C C C |
| ENSRNOSNP2785111 | WKYc96h01_s1_143                    | 256049463 | C T T T T T T T | T T T T C T T T T T       | T T T |
| ENSRNOSNP2785112 | Cpn_1256081651                      | 256081651 | A C C C C C C C | C C C C C C C C - C       | A A A |
| ENSRNOSNP2785113 | J598123                             | 256102412 | T T T T T T T A | T T T T T T T T -         | A A A |
| ENSRNOSNP2785114 | J529527                             | 256341785 | A A A - T A - T | A T T T T A - A T A A     | A A A |
| ENSRNOSNP2785115 | WKYc28h03_r1_466                    | 256345221 | A A A A C C A C | C C C C C C C C C C C C   | C C C |
| ENSRNOSNP2785116 | WKYOa52g07_s1_155                   | 256566508 | T C C C C C C C | C C C C C C C C - C C C   | C C C |
| ENSRNOSNP2785117 | J536037                             | 256651378 | T T T T T T T A | T T T T T T T T T T       | A A A |
| ENSRNOSNP2785118 | WKYe12f08_s1_142                    | 256694017 | A A A A G G A G | A A - A A A A A A A A     | G G G |
| ENSRNOSNP2785119 | J477674                             | 256775981 | G A A A A A A A | A A A A A A A A A A -     | A A A |
| ENSRNOSNP2785120 | WKYc74c06_s1_792                    | 256807760 | T T T T C C T C | T T T T T T T T T T       | T T T |
| ENSRNOSNP2785121 | gnl ti 896487007_19866867643685_278 | 256985121 | T T T T G G T G | T T T T G T T T T T T T   | T T T |
| ENSRNOSNP2785122 | J549695                             | 257092128 | G A A A A A A A | A A A A A A A A A A A A   | A A A |
| ENSRNOSNP2785123 | J563204                             | 257302761 | T T T T T T T C | T T T T T T T T T T -     | C C C |
| ENSRNOSNP2785124 | WKYOa11c05_s1_415                   | 257307659 | A A A A G G A G | A A A A G A A A A A A A   | A A A |
| ENSRNOSNP2785126 | gnl ti 896804887_19866867039419_252 | 257483034 | A A A A A A A C | A A A A C A A A A A A A   | C C C |
| ENSRNOSNP2785127 | J548815                             | 257517511 | G G G G A A G A | G G G G A G G G G G G -   | A A A |
| ENSRNOSNP2785128 | gnl ti 896696792_19866868286899_289 | 257629363 | T G G G - T G G | G G G G G G G G G G G G   | G G G |
| ENSRNOSNP2785129 | J657133                             | 257758658 | C T T T T T T T | T T T T T T T T T T T T   | C C C |
| ENSRNOSNP2785130 | gko-103i3_fp2_b1_461                | 257812633 | G A A G G A A   | G G G G G G G G G G G G   | A A A |
| ENSRNOSNP2785131 | J658290                             | 257937532 | T G G - G G - G | G G G G G G - G G G G G - | G G G |
| ENSRNOSNP2785132 | gko-85n6_fp2_b1_424                 | 257951523 | A G G G G G G G | G G G G G G G G G G G G   | G G G |
| ENSRNOSNP2785133 | J1287994                            | 258032919 | A A A - G G - G | A A A A A - A A A A -     | A A A |
| ENSRNOSNP2785134 | rdahl-97n21_fp2_b1_260              | 258097849 | G A A A G G A A | G G G G G G G G - G G G   | G G G |
| ENSRNOSNP2785135 | J537014                             | 258160379 | G T T T T T T T | G G G G T - G G G G -     | T T T |
| ENSRNOSNP2785136 | rdahl-74p19_fp2_b1_808              | 258250123 | C T T T C C T T | T T T T T T T T T T T T   | C C C |
| ENSRNOSNP2785137 | gnl ti 896984663_19866867936401_360 | 258395004 | C A A A A A A A | A A A A C A A A A A A A   | A A A |
| ENSRNOSNP2785138 | rdahl-19j5_fp2_b1_660               | 258533775 | G T T T G G T T | T T T T T T T T T T T T   | G G G |
| ENSRNOSNP2785139 | J589089                             | 258565344 | A G G G A A G G | G G G G A G G G G G G G   | G G G |
| ENSRNOSNP2785140 | WKY-G-i-24c09_f1_1296               | 258949177 | A A A A C C A C | A A A A A A A A A A A A   | A A A |
| ENSRNOSNP2785141 | gnl ti 842493205_50149288_295       | 259115635 | G A A G G A A   | G G G G A G G G G G G G   | G G G |
| ENSRNOSNP2785142 | J649333                             | 259303930 | G G G G A A G A | G G G G G G G G G G G G   | A A A |
| ENSRNOSNP2785143 | WKYc96g09_s1_647                    | 259431003 | G G G G C C G C | G G G G G G G G G G G G   | G G G |
| ENSRNOSNP2785144 | J684532                             | 259466027 | A C C C C C C C | C C C C C C C C C C -     | A A A |
| ENSRNOSNP2785145 | gko-85d23_fp2_b1_704                | 259613114 | G G G G A A G A | G G G G G G G G G G G G   | A A A |
| ENSRNOSNP2785146 | WKYc55f03_s1_57                     | 259682909 | C T T - T T T T | T T T T T T T T T T T T   | T T T |
| ENSRNOSNP2785147 | Cpn_1259757182                      | 259757182 | G A A A A A A A | A A A A A A A A A A A A   | A A A |
| ENSRNOSNP2785148 | J687411                             | 259768068 | G G G G G G G A | G G G G G G G G G G -     | G G G |
| ENSRNOSNP2785150 | J543992                             | 260120668 | C C C C C C C T | C C C C C C C C C C -     | T T T |



|                  |                                     |           |   |   |   |   |   |   |   |   |   |   |   |   |   |   |   |   |   |   |   |   |   |   |   |
|------------------|-------------------------------------|-----------|---|---|---|---|---|---|---|---|---|---|---|---|---|---|---|---|---|---|---|---|---|---|---|
| ENSRNOSNP2785190 | J639804                             | 264276274 | G | G | G | G | G | G | G | A | A | A | A | A | G | A | A | A | A | A | - | G | G | G |   |
| ENSRNOSNP2785191 | gko-76k16_rp2_b1_86                 | 264305485 | G | G | G | G | G | G | G | A | G | G | G | G | G | G | G | G | G | G | G | G | A | A | A |
| ENSRNOSNP2785192 | rat104_069_p02.q1ca_479             | 264614701 | A | C | C | C | C | C | C | C | C | C | C | C | C | C | C | C | C | C | C | C | C | C | C |
| ENSRNOSNP2785193 | Cpn_1264614861                      | 264614861 | C | T | T | T | T | T | T | T | T | T | T | T | T | T | T | T | T | T | T | T | T | T | T |
| ENSRNOSNP2785194 | J472637                             | 264637488 | A | A | A | A | A | A | A | G | A | A | A | A | A | A | A | A | A | A | A | - | G | G | G |
| ENSRNOSNP2785195 | J507202                             | 264748071 | T | T | T | T | T | T | T | A | T | T | T | T | T | T | T | T | T | T | T | - | A | A | A |
| ENSRNOSNP2785196 | WKYc81d05_s1_72                     | 264838258 | A | G | G | G | G | G | G | G | G | G | G | G | G | G | G | G | G | G | G | G | A | A | A |
| ENSRNOSNP2785197 | J506658                             | 264898559 | C | C | C | C | C | C | C | T | C | C | C | C | C | C | C | C | C | C | C | C | T | T | T |
| ENSRNOSNP2785198 | SHRSPa17c07_r1_925                  | 264975989 | G | C | C | C | C | C | C | C | C | C | C | C | C | C | C | C | C | C | C | C | G | G | G |
| ENSRNOSNP2785199 | J580196                             | 265120413 | G | G | G | G | G | G | G | T | G | G | G | G | G | G | G | G | G | G | G | - | T | T | T |
| ENSRNOSNP2785200 | gko-67j4_rp2_b1_656                 | 265120622 | T | C | C | C | T | T | C | C | C | C | C | C | C | C | C | C | C | C | C | C | C | C | C |
| ENSRNOSNP2785201 | rat101_031_n21.p1ca_169             | 265305730 | G | G | G | G | A | A | G | A | G | G | G | G | G | G | G | G | G | G | G | G | G | G | G |
| ENSRNOSNP2785202 | rat101_005_a10.p1ca_321             | 265306719 | A | A | A | A | G | G | A | G | A | A | A | A | A | A | A | A | A | A | A | A | G | G | G |
| ENSRNOSNP2785203 | gko-57g10_rp2_b1_307                | 265606203 | T | G | G | G | T | T | G | G | G | G | G | G | G | G | G | G | G | G | G | G | G | G | G |
| ENSRNOSNP2785204 | rdahl-13d10_fp2_b1_119              | 265780564 | T | A | A | A | A | A | A | A | A | A | A | A | A | A | A | A | A | A | A | A | A | A | A |
| ENSRNOSNP2785205 | SHRSPc67g11_r1_497                  | 266004074 | G | G | G | G | G | G | G | C | C | C | - | C | C | C | C | C | C | C | C | C | G | G | G |
| ENSRNOSNP2785206 | J876269                             | 266026349 | C | T | T | T | C | C | T | T | T | T | T | T | T | T | T | T | T | T | T | - | T | T | T |
| ENSRNOSNP2785207 | J557484                             | 266121730 | C | A | A | A | C | C | A | A | C | C | C | C | C | C | C | C | C | C | C | C | A | A | A |
| ENSRNOSNP2785208 | gnl tij896599295_19866867070955_252 | 266197938 | T | C | C | C | C | C | C | C | C | C | C | C | C | C | C | C | C | C | C | C | C | C | C |
| ENSRNOSNP2785209 | J483342                             | 266217621 | G | C | C | C | - | - | C | C | C | C | C | C | C | C | C | C | C | C | C | - | C | C | C |
| ENSRNOSNP2785210 | rat110_008_h22.p1ca_98              | 266227149 | G | A | A | A | A | A | A | A | A | A | A | A | A | A | A | A | A | A | A | A | A | A | A |
| ENSRNOSNP2785211 | SHRSPc12b09_r1_586                  | 266460770 | C | C | C | C | C | C | C | T | T | T | T | T | T | T | T | T | T | T | T | T | C | C | C |
| ENSRNOSNP2785212 | J873120                             | 266493431 | C | C | C | C | C | C | C | A | A | A | A | A | A | A | A | A | A | A | A | A | C | C | C |
| ENSRNOSNP2785213 | WKYc30a10_r1_599                    | 266567568 | T | T | T | T | C | C | T | C | T | T | T | T | T | T | T | T | T | T | T | T | T | T | T |
| ENSRNOSNP2785214 | gnl tij897030222_19866868437155_261 | 266742664 | C | C | C | C | C | C | C | T | T | T | T | T | T | T | T | T | T | T | T | T | C | C | C |
| ENSRNOSNP2785215 | J490207                             | 266979802 | G | A | A | A | A | A | A | A | G | G | G | G | G | G | G | G | G | G | G | G | A | A | A |
| ENSRNOSNP2785216 | rat102_039_o17.q1ca_138             | 267130082 | G | C | C | C | C | C | C | C | C | C | C | C | C | C | C | C | C | C | C | C | C | C | C |
| ENSRNOSNP2785217 | rat103_033_114.q1ca_306             | 267130263 | A | G | G | G | G | G | G | G | G | G | G | G | G | G | G | G | G | G | G | G | G | G | G |
| ENSRNOSNP2785218 | Cpn_1267130354                      | 267130354 | G | G | G | G | G | G | G | C | C | C | C | C | C | C | C | C | C | C | C | C | G | G | G |
| ENSRNOSNP2785219 | J672723                             | 267194715 | G | C | C | C | C | C | C | C | C | C | C | C | C | C | C | C | C | C | C | - | C | C | C |
| ENSRNOSNP2785220 | WKYc57g01_s1_188                    | 267269141 | T | C | C | C | C | C | C | C | C | C | C | C | C | C | C | C | C | C | C | C | C | C | C |
| ENSRNOSNP2785221 | J680709                             | 267369088 | C | G | G | G | G | G | G | G | G | G | G | G | G | G | G | G | G | G | G | - | G | G | G |
| ENSRNOSNP2785222 | rdahl-90j15_rp2_b1_405              | 267426035 | A | G | G | G | G | G | G | G | G | G | G | G | G | G | G | G | G | G | G | G | G | G | G |
| ENSRNOSNP2785223 | SHRSPa01h01_r1_37                   | 267825206 | C | T | T | T | T | T | T | T | T | T | T | T | T | T | T | T | T | T | T | T | T | T | T |
| ENSRNOSNP2785224 | J526751                             | 267832846 | G | A | A | A | A | A | A | A | A | A | A | A | A | A | A | A | A | A | A | - | A | A | A |
