# Supplementary material for: Pathophysiological, Genetic and Gene Expression Features of a Novel Rodent Model of the Cardio-Metabolic Syndrome
Source: PubMed Central journal article supplement (PMC2500170; doi:10.1371/journal.pone.0002962), 2008-08-13
Supplement: pone.0002962.s002.pdf [file pone.0002962.s002.pdf]

**Table S2.** Statistically significant transcription changes (P<0.05) between BN.GK-Nidd/gk1 congenics and BN controls in kidney, liver, skeletal muscle (Soleus) and adipose tissue (Retroperitoneal fat pad -RFP). When several probesets were designed for the same gene, results are given for individual probesets. Transcription ratio (TR) between groups and statistical significance are reported.

| Chr | Genomic Location (bp) | Affymetrix   | Symbol    | Gene description                                                        | Kidney |          | Liver |          | Soleus |          | RFP    |          | GenBank   | UniGene  |
|-----|-----------------------|--------------|-----------|-------------------------------------------------------------------------|--------|----------|-------|----------|--------|----------|--------|----------|-----------|----------|
|     |                       |              |           |                                                                         | TR     | P-Value  | TR    | P-Value  | TR     | P-Value  | TR     | P-Value  |           |          |
| 1   | 3319791               | 1375658_at   | ---       | Transcribed locus                                                       | -1.11  | 3.71E-01 | -1.48 | 4.26E-02 | -1.24  | 4.87E-01 | -1.37  | 2.04E-01 | AI412317  | Rn.22768 |
| 1   | 3598474               | 1380865_at   | ---       | Transcribed locus                                                       | 1.32   | 7.25E-04 | -1.39 | 1.18E-01 | 1.01   | 9.89E-01 | -1.02  | 9.40E-01 | BM385284  | ---      |
| 1   | 3609014               | 1372650_at   | ---       | Transcribed locus strongly similar to KIAA1010 protein                  | -1.35  | 1.67E-04 | -1.65 | 3.17E-03 | 1.03   | 9.88E-01 | -1.36  | 1.51E-01 | BI296334  | Rn.11811 |
| 1   | 17388089              | 1368155_at   | Cyp2c40   | cytochrome P450, family 2, subfamily c, polypeptide 40                  | 1.01   | 9.73E-01 | 3.14  | 8.86E-03 | -1.03  | 9.79E-01 | 1.00   | 9.96E-01 | NM_031572 | Rn.2586  |
| 1   | 20839512              | 1367798_at   | Ahcy      | S-adenosylhomocysteine hydrolase                                        | -1.22  | 4.88E-02 | -1.05 | 7.23E-01 | -1.03  | 9.76E-01 | 1.04   | 8.13E-01 | NM_017201 | Rn.5878  |
| 1   | 21087436              | 1367905_at   | Enpp3     | ectonucleotide pyrophosphatase/phosphodiesterase 3                      | 1.06   | 7.75E-01 | -1.33 | 3.52E-02 | -1.17  | 9.66E-01 | 1.03   | 9.69E-01 | NM_019370 | Rn.44    |
| 1   | 26954423              | 1372626_at   | Tpd52l1   | Tumor protein D52-like 1                                                | -1.05  | 8.11E-01 | 2.71  | 8.55E-03 | -1.02  | 9.92E-01 | 1.25   | 6.24E-01 | AI231999  | Rn.24825 |
| 1   | 29159371              | 1390632_at   | ---       | LOC361464                                                               | 1.05   | 8.01E-01 | -1.42 | 2.77E-02 | 1.03   | 9.94E-01 | 1.18   | 3.16E-01 | BE107414  | Rn.51175 |
| 1   | 41919698              | 1379249_at   | Wtap      | Wilms' tumour 1-associating protein                                     | 1.03   | 9.14E-01 | -1.40 | 2.60E-02 | 1.04   | 9.79E-01 | 1.15   | 4.90E-01 | AA900400  | Rn.6971  |
| 1   | 78854683              | 1394796_at   | LOC688391 | MAP/microtubule affinity-regulating kinase 4                            | 1.01   | 9.34E-01 | 1.26  | 3.42E-02 | 1.12   | 8.96E-01 | 1.00   | 9.99E-01 | AA964964  | Rn.33009 |
| 1   | 79074787              | 1368587_at   | Apoc1     | apolipoprotein C-I                                                      | -1.35  | 1.66E-03 | 1.01  | 9.60E-01 | -1.07  | 9.54E-01 | -1.25  | 3.70E-01 | NM_012824 | Rn.8887  |
| 1   | 84461905              | 1375706_at   | ---       | Transcribed locus                                                       | 1.17   | 1.56E-02 | 1.30  | 1.84E-01 | -1.10  | 9.06E-01 | 1.26   | 3.16E-01 | AI230273  | ---      |
| 1   | 87995365              | 1383012_at   | ---       | Transcribed locus moderately similar to LOC360381                       | -1.08  | 7.87E-01 | -1.69 | 4.35E-02 | -1.06  | 9.59E-01 | -1.03  | 9.30E-01 | BE115155  | Rn.15145 |
| 1   | 93820963              | 1385465_at   | ---       | Transcribed locus                                                       | -2.19  | 2.50E-05 | -6.59 | 3.00E-09 | -4.89  | 1.60E-04 | -15.03 | 8.09E-07 | BG379188  | ---      |
| 1   | 94490876              | 1371080_at   | LOC292861 | kallikrein                                                              | -1.94  | 9.69E-05 | -1.02 | 9.53E-01 | 1.01   | 9.91E-01 | -1.04  | 7.97E-01 | AI169562  | Rn.21391 |
| 1   | 96251683              | 1387874_at   | Dbp       | D site albumin promoter binding protein                                 | 1.97   | 9.38E-03 | 2.41  | 1.28E-01 | 1.62   | 4.63E-01 | 1.58   | 3.92E-01 | AI230048  | Rn.11274 |
| 1   | 96276007              | 1376248_at   | Sult2b1   | sulfotransferase family, cytosolic, 2B, member 1                        | 1.01   | 9.67E-01 | 1.35  | 4.77E-02 | 1.01   | 9.94E-01 | 1.51   | 4.68E-01 | BM390571  | Rn.12882 |
| 1   | 109357282             | 1378391_at   | ---       | Transcribed locus                                                       | 1.30   | 2.26E-02 | -1.05 | 7.43E-01 | 1.05   | 9.53E-01 | -1.02  | 9.35E-01 | AI511069  | Rn.41288 |
| 1   | 110892401             | 1383510_at   | ---       | Transcribed locus                                                       | 1.56   | 1.67E-04 | 1.38  | 3.54E-02 | 1.51   | 3.19E-02 | 1.71   | 1.10E-02 | AI230360  | Rn.249   |
| 1   | 118489584             | 1375177_at   | ---       | Similar to Krueppel-like factor 13                                      | 1.18   | 7.66E-02 | 1.37  | 2.91E-02 | 1.16   | 6.81E-01 | 1.39   | 2.41E-01 | AI454932  | Rn.7654  |
| 1   | 118855516             | 1372117_at   | Mttr10    | myotubularin related protein 10                                         | -1.19  | 7.23E-03 | -1.04 | 8.87E-01 | 1.02   | 9.88E-01 | -1.21  | 2.19E-01 | BE329026  | Rn.3510  |
| 1   | 120403185             | 1387812_at   | Pace4     | Subtilisin - like endoprotease                                          | -1.40  | 1.82E-02 | -1.14 | 4.70E-01 | -1.16  | 8.96E-01 | 1.24   | 1.37E-01 | NM_012999 | Rn.950   |
| 1   | 121177229             | 1377357_at   | ---       | Transcribed locus                                                       | -1.25  | 1.28E-03 | -1.09 | 7.87E-01 | -1.24  | 1.52E-01 | -1.34  | 1.90E-01 | BE106428  | Rn.23597 |
| 1   | 122546780             | 1376738_at   | Ttc23     | tetratricopeptide repeat domain 23                                      | -1.04  | 8.31E-01 | -1.75 | 2.70E-03 | -1.99  | 1.09E-03 | 1.01   | 9.62E-01 | BF284579  | Rn.16924 |
| 1   | 122910984             | 1380971_at   | Igf1r     | Insulin-like growth factor 1 receptor                                   | -1.65  | 2.60E-04 | -1.03 | 9.22E-01 | -1.52  | 3.10E-02 | -1.23  | 4.64E-01 | BE120747  | Rn.28746 |
| 1   | 128797261             | 1379830_at   | ---       | Transcribed locus                                                       | 2.16   | 5.00E-06 | 2.28  | 8.89E-05 | 2.19   | 4.84E-03 | 2.81   | 2.85E-03 | BF396633  | Rn.63869 |
| 1   | 129657552             | 1379236_at   | ---       | Transcribed locus                                                       | 1.25   | 1.84E-02 | 1.04  | 9.23E-01 | -1.10  | 9.55E-01 | 1.32   | 2.87E-01 | BF405781  | Rn.60839 |
| 1   | 131460918             | 1398727_at   | ---       | Transcribed locus weakly similar to phospholipid-transporting ATPase IF | 1.31   | 4.67E-02 | -1.27 | 3.57E-01 | 1.06   | 9.75E-01 | -1.31  | 3.45E-01 | BF398091  | Rn.32838 |
| 1   | 131643841             | 1377209_at   | ---       | Transcribed locus                                                       | -1.17  | 1.57E-01 | -1.98 | 8.89E-05 | -1.01  | 9.89E-01 | 1.09   | 5.86E-01 | BI283664  | Rn.16545 |
| 1   | 134627350             | 1376950_at   | Det1      | de-etiolated homolog 1                                                  | -1.08  | 5.07E-01 | -1.45 | 4.51E-02 | -1.16  | 8.96E-01 | -1.11  | 6.58E-01 | BE098978  | Rn.9608  |
| 1   | 135592140             | 1379361_at   | Pex11a    | peroxisomal biogenesis factor 11A                                       | -1.33  | 3.86E-03 | -1.15 | 6.68E-01 | -1.46  | 3.59E-01 | 1.09   | 7.91E-01 | BI273703  | Rn.25177 |
| 1   | 135593294             | 1387740_at   | Pex11a    | peroxisomal biogenesis factor 11A                                       | -1.36  | 3.35E-03 | -1.10 | 7.70E-01 | -1.24  | 6.01E-01 | 1.03   | 9.56E-01 | NM_053487 | Rn.14519 |
| 1   | 135945648             | 1389650_at   | Znf366    | Zinc finger protein 366                                                 | -3.30  | 1.22E-07 | -1.21 | 3.39E-01 | -2.43  | 2.01E-03 | -3.51  | 2.59E-06 | BI295153  | ---      |
| 1   | 135946914             | 1381453_at   | ---       | Transcribed locus                                                       | -1.32  | 1.56E-02 | 1.07  | 6.86E-01 | 1.35   | 9.05E-01 | -1.30  | 2.08E-01 | BE110814  | Rn.27028 |
| 1   | 137905242             | 1368872_a_at | Homer2    | homer homolog 2 (Drosophila)                                            | -1.36  | 3.89E-03 | 1.10  | 7.23E-01 | -1.41  | 3.65E-01 | 1.06   | 8.85E-01 | NM_053309 | Rn.30014 |
| 1   | 137953277             | 1397452_at   | ---       | Transcribed locus                                                       | -1.30  | 6.99E-03 | -1.18 | 3.22E-01 | -1.91  | 2.51E-02 | -1.44  | 1.01E-01 | AI112776  | ---      |

|   |           |              |            |                                                                               |       |          |       |          |       |          |       |          |           |          |
|---|-----------|--------------|------------|-------------------------------------------------------------------------------|-------|----------|-------|----------|-------|----------|-------|----------|-----------|----------|
| 1 | 138058667 | 1372066_at   | Fam103a1   | family with sequence similarity 103A1                                         | 1.20  | 4.77E-03 | -1.03 | 8.73E-01 | -1.14 | 5.43E-01 | 1.07  | 7.67E-01 | AI170703  | Rn.4307  |
| 1 | 138064475 | 1376780_at   | ---        | Transcribed locus                                                             | 8.41  | 1.09E-09 | 1.96  | 1.52E-03 | 3.53  | 6.13E-06 | 2.48  | 9.81E-05 | AI172311  | Rn.40252 |
| 1 | 138077689 | 1392745_at   | RGD1305713 | similar to RIKEN cDNA 3110040N11                                              | 1.73  | 6.90E-05 | 1.48  | 3.89E-03 | 1.85  | 1.09E-03 | 2.22  | 1.54E-04 | BG380502  | Rn.64273 |
| 1 | 138174461 | 1374151_at   | Hdgfrp3    | Hepatoma-derived growth factor, related protein 3                             | -1.14 | 3.19E-01 | -1.24 | 5.44E-02 | -1.45 | 1.05E-02 | -1.41 | 5.14E-02 | BI289940  | Rn.8544  |
| 1 | 138175446 | 1394596_at   | Hdgfrp3    | Hepatoma-derived growth factor, related protein 3                             | -1.14 | 3.25E-01 | -1.19 | 3.63E-01 | -1.38 | 2.18E-02 | -1.41 | 2.57E-01 | AW531463  | Rn.47713 |
| 1 | 138476741 | 1368931_at   | Sh3gl3     | SH3 domain protein 2 C1                                                       | -1.01 | 9.80E-01 | 1.47  | 3.27E-02 | -1.01 | 9.91E-01 | -1.10 | 7.09E-01 | NM_031238 | Rn.5909  |
| 1 | 140251089 | 1371820_at   | Mesdc2     | mesoderm development candiate 2                                               | 1.15  | 3.42E-02 | 1.14  | 4.57E-01 | -1.07 | 9.60E-01 | 1.08  | 5.42E-01 | BI282064  | Rn.13022 |
| 1 | 140614228 | 1373315_at   | ---        | Transcribed locus                                                             | -1.75 | 2.11E-05 | 1.06  | 8.35E-01 | -1.08 | 9.70E-01 | 1.05  | 8.50E-01 | AI176425  | Rn.800   |
| 1 | 143494221 | 1368543_at   | Nox4       | NADPH oxidase 4                                                               | 1.65  | 6.90E-05 | 2.38  | 7.55E-02 | -1.59 | 6.90E-01 | -1.41 | 3.46E-01 | NM_053524 | Rn.14744 |
| 1 | 143682602 | 1393508_at   | ---        | Transcribed locus                                                             | 1.92  | 3.11E-06 | 3.25  | 2.04E-03 | -1.37 | 9.06E-01 | -1.14 | 7.99E-01 | AI043805  | Rn.18728 |
| 1 | 146832490 | 1369452_a_at | Picalm     | phosphatidylinositol binding clathrin assembly protein                        | 1.15  | 4.46E-02 | -1.03 | 9.25E-01 | -1.04 | 9.74E-01 | -1.00 | 9.96E-01 | NM_053554 | Rn.10888 |
| 1 | 147162130 | 1390107_at   | ---        | Transcribed locus                                                             | 1.57  | 2.21E-06 | 1.62  | 1.40E-03 | 1.11  | 9.70E-01 | -1.01 | 9.76E-01 | BG670294  | ---      |
| 1 | 149835626 | 1393657_at   | Prpc       | prolylcarboxypeptidase (angiotensinase C)                                     | 1.26  | 1.04E-01 | 1.53  | 5.83E-03 | 1.27  | 5.68E-01 | 5.28  | 8.09E-07 | BI285860  | Rn.78613 |
| 1 | 149841592 | 1379248_at   | ---        | Transcribed locus                                                             | 1.25  | 8.65E-02 | 1.44  | 3.46E-03 | 1.21  | 5.36E-01 | 2.41  | 2.96E-03 | AA926318  | Rn.8457  |
| 1 | 154408321 | 1392533_at   | Nars2      | asparaginyl-tRNA synthetase 2, mitochondrial                                  | 1.02  | 9.25E-01 | -1.04 | 9.14E-01 | 1.36  | 2.82E-02 | 1.15  | 4.93E-01 | AI716888  | Rn.16411 |
| 1 | 154864943 | 1383104_at   | LOC361606  | similar to RIKEN cDNA 1810020D17                                              | 1.09  | 2.62E-01 | 1.26  | 2.26E-02 | 1.14  | 7.86E-01 | 1.27  | 1.28E-01 | BI295116  | Rn.19052 |
| 1 | 155052201 | 1384877_at   | Aqp11      | aquaporin 11                                                                  | 1.49  | 2.78E-05 | 1.19  | 1.76E-01 | -1.02 | 9.81E-01 | -1.33 | 6.30E-01 | AI072405  | Rn.20144 |
| 1 | 155443097 | 1385851_at   | Capn5      | Calpain 5                                                                     | 1.12  | 2.24E-01 | 1.42  | 4.43E-02 | -1.03 | 9.88E-01 | 1.07  | 8.66E-01 | AA925441  | Rn.15526 |
| 1 | 155530962 | 1390187_at   | ---        | Transcribed locus                                                             | 1.22  | 6.44E-02 | 1.76  | 1.45E-02 | 1.08  | 9.68E-01 | 1.48  | 8.34E-02 | AI060043  | Rn.19122 |
| 1 | 156251610 | 1374729_at   | ---        | Transcribed locus strongly similar to UV radiation resistance associated gene | -1.04 | 6.86E-01 | -1.14 | 3.19E-01 | -1.49 | 3.76E-03 | -1.06 | 7.15E-01 | BM385616  | Rn.15803 |
| 1 | 156525993 | 1371615_at   | Dgat2      | diacylglycerol O-acyltransferase homolog 2                                    | 1.55  | 7.21E-05 | 1.15  | 4.79E-01 | 1.07  | 9.89E-01 | 1.55  | 2.13E-01 | BI279069  | Rn.9523  |
| 1 | 156526795 | 1391045_at   | Dgat2      | diacylglycerol O-acyltransferase homolog 2                                    | 1.47  | 9.65E-06 | 1.16  | 4.06E-01 | 1.05  | 9.91E-01 | 1.75  | 1.28E-01 | BI277463  | Rn.23436 |
| 1 | 156594938 | 1383979_at   | ---        | Transcribed locus                                                             | 1.49  | 2.27E-03 | -1.05 | 7.77E-01 | 1.02  | 9.88E-01 | 1.16  | 7.20E-01 | BM392389  | Rn.19175 |
| 1 | 156745316 | 1371310_s_at | Serpinh1   | serine (or cysteine) proteinase inhibitor, clade H, member 1                  | 1.09  | 5.92E-01 | -3.39 | 1.34E-06 | -1.14 | 9.87E-01 | 1.13  | 6.49E-01 | BI285495  | Rn.32111 |
| 1 | 157021524 | 1397957_at   | ---        | Transcribed locus                                                             | -1.28 | 5.54E-03 | 1.03  | 8.98E-01 | -1.07 | 9.55E-01 | -1.25 | 1.18E-01 | AA955460  | Rn.73491 |
| 1 | 157024354 | 1391138_at   | ---        | Transcribed locus                                                             | 1.39  | 2.12E-03 | -1.03 | 9.25E-01 | 1.11  | 7.25E-01 | 1.46  | 2.28E-02 | BF410536  | ---      |
| 1 | 157531462 | 1384265_at   | Pold3      | polymerase (DNA-directed), delta 3, accessory subunit                         | 1.00  | 9.80E-01 | -1.38 | 1.47E-02 | -1.05 | 9.74E-01 | -1.02 | 9.37E-01 | BI278347  | Rn.45023 |
| 1 | 158043874 | 1374416_at   | ---        | Transcribed locus                                                             | 1.34  | 5.63E-04 | -1.08 | 6.13E-01 | 1.25  | 4.01E-01 | 1.10  | 7.06E-01 | AI169330  | ---      |
| 1 | 158085215 | 1379306_at   | ---        | Transcribed locus                                                             | -1.80 | 2.84E-06 | -1.76 | 4.13E-04 | -1.99 | 5.46E-05 | -1.56 | 2.28E-02 | BE111794  | Rn.19759 |
| 1 | 158160911 | 1370334_at   | Plekhb1    | evectin-1                                                                     | -1.39 | 3.86E-03 | -1.70 | 2.77E-02 | -1.16 | 9.53E-01 | -1.45 | 7.19E-02 | AF081582  | Rn.8415  |
| 1 | 158396007 | 1374907_at   | ---        | Transcribed locus                                                             | 1.33  | 2.11E-02 | 1.11  | 5.64E-01 | 1.31  | 9.18E-01 | 1.26  | 3.20E-01 | BI274338  | Rn.41004 |
| 1 | 159550706 | 1369031_at   | Il18bp     | interferon gamma inducing factor binding protein                              | 1.31  | 3.98E-03 | 1.40  | 3.83E-02 | 1.62  | 1.71E-01 | 1.29  | 2.04E-01 | NM_053374 | Rn.20083 |
| 1 | 167456059 | 1371085_at   | Ascl3      | achaete-scute complex homolog-like 3                                          | -2.37 | 1.81E-07 | -2.20 | 4.01E-04 | -2.16 | 5.46E-05 | -3.56 | 8.09E-07 | AB046449  | Rn.19594 |
| 1 | 167465181 | 1374675_at   | ---        | Similar to D7H11orf15 protein                                                 | 1.27  | 2.51E-04 | 1.24  | 2.15E-01 | 1.40  | 3.21E-02 | 1.23  | 9.32E-02 | BG374992  | Rn.8151  |
| 1 | 168680142 | 1383139_at   | rnf141     | Ring finger protein 141                                                       | -1.07 | 3.88E-01 | -1.44 | 2.35E-03 | -1.01 | 9.91E-01 | -1.03 | 9.12E-01 | BM386881  | Rn.11887 |
| 1 | 168682049 | 1393939_at   | rnf141     | Ring finger protein 141                                                       | -1.04 | 8.36E-01 | -1.33 | 2.57E-02 | 1.03  | 9.79E-01 | 1.07  | 6.60E-01 | AI137989  | Rn.27556 |
| 1 | 168683040 | 1385787_at   | rnf141     | ring finger protein 141                                                       | 1.03  | 8.89E-01 | -1.47 | 1.79E-03 | 1.04  | 9.79E-01 | 1.05  | 8.89E-01 | AI059580  | Rn.19219 |
| 1 | 169040461 | 1396347_at   | ---        | Transcribed locus                                                             | -1.05 | 8.69E-01 | -1.04 | 8.51E-01 | -1.88 | 2.12E-02 | 1.06  | 9.45E-01 | BF395640  | Rn.47103 |
| 1 | 170822207 | 1373808_at   | ---        | CDNA clone IMAGE:7193711                                                      | 1.21  | 1.83E-02 | -1.23 | 4.61E-01 | 1.28  | 5.43E-01 | -1.02 | 9.47E-01 | BF417211  | Rn.13986 |
| 1 | 172157027 | 1373487_at   | ---        | Transcribed locus                                                             | -1.39 | 3.43E-05 | -1.00 | 9.91E-01 | -1.16 | 9.44E-01 | -1.29 | 6.02E-01 | AI030552  | Rn.6377  |
| 1 | 174571185 | 1379433_at   | Pik3c2a    | Phosphatidylinositol 3-kinase, C2 domain containing, alpha polypeptide        | 1.48  | 1.58E-04 | 1.58  | 3.14E-03 | 1.36  | 6.57E-01 | 1.48  | 1.65E-01 | AI059449  | Rn.19464 |

|   |           |            |            |                                                                           |       |          |       |          |       |          |        |          |           |          |
|---|-----------|------------|------------|---------------------------------------------------------------------------|-------|----------|-------|----------|-------|----------|--------|----------|-----------|----------|
| 1 | 174750004 | 1370000_at | Nucb2      | nucleobindin 2                                                            | 1.36  | 8.76E-04 | 1.86  | 4.25E-03 | -1.01 | 1.00E+00 | 1.21   | 2.60E-01 | NM_021663 | Rn.41602 |
| 1 | 175946698 | 1374543_at | ---        | Transcribed locus                                                         | -1.23 | 2.90E-02 | 1.01  | 9.82E-01 | 1.08  | 9.67E-01 | -1.51  | 7.34E-03 | AA858791  | Rn.16899 |
| 1 | 177210126 | 1382159_at | ---        | CDNA clone MGC:94842 IMAGE:7109216                                        | -1.58 | 2.84E-06 | -1.55 | 2.52E-03 | -1.78 | 2.51E-03 | -1.77  | 1.35E-03 | BF386740  | Rn.24108 |
| 1 | 177345660 | 1373336_at | ---        | G protein-coupled receptor, family C, group 5B                            | -1.08 | 5.48E-01 | -1.01 | 9.83E-01 | -1.08 | 9.81E-01 | 1.58   | 1.97E-02 | AI411074  | Rn.9999  |
| 1 | 177347289 | 1371671_at | ---        | G protein-coupled receptor, family C, group 5B                            | 1.01  | 9.85E-01 | -1.02 | 9.39E-01 | -1.00 | 1.00E+00 | 1.61   | 2.14E-03 | AI228513  | Rn.15338 |
| 1 | 177849164 | 1386933_at | Gp2        | glycoprotein 2 (zymogen granule membrane)                                 | -1.88 | 7.98E-05 | -1.04 | 8.73E-01 | -1.05 | 9.64E-01 | 1.10   | 5.26E-01 | NM_134418 | Rn.11223 |
| 1 | 178220412 | 1383303_at | ---        | Similar to RIKEN cDNA 4933424N09                                          | 1.01  | 9.69E-01 | -1.53 | 4.91E-03 | 1.02  | 9.89E-01 | -1.09  | 5.48E-01 | BI282211  | Rn.28004 |
| 1 | 178222864 | 1394458_at | ---        | Similar to RIKEN cDNA 4933424N09                                          | -1.03 | 8.99E-01 | -1.57 | 9.82E-03 | 1.11  | 8.61E-01 | -1.09  | 6.91E-01 | BF291026  | ---      |
| 1 | 179630314 | 1381176_at | ---        | Transcribed locus                                                         | 1.34  | 2.95E-03 | 1.05  | 7.38E-01 | 1.53  | 6.67E-01 | 1.34   | 2.40E-01 | BF409078  | ---      |
| 1 | 181000243 | 1398544_at | ---        | Transcribed locus                                                         | 1.18  | 2.56E-02 | 1.05  | 7.74E-01 | 1.41  | 1.92E-01 | 1.34   | 3.62E-01 | BF398673  | Rn.79288 |
| 1 | 185515397 | 1388462_at | ---        | Transcribed locus                                                         | -1.06 | 6.03E-01 | 1.87  | 1.02E-04 | 1.19  | 5.71E-01 | 1.30   | 2.88E-01 | AI407506  | ---      |
| 1 | 186111163 | 1390333_at | Ppp4c      | Protein phosphatase 4 (formerly X), catalytic subunit                     | 1.25  | 9.43E-04 | 1.43  | 1.63E-03 | 1.18  | 5.43E-01 | 1.18   | 3.04E-01 | AA957050  | Rn.9173  |
| 1 | 186343049 | 1397628_at | RGD1305592 | similar to RIKEN cDNA 2900092E17                                          | -1.17 | 8.78E-02 | -1.27 | 4.64E-02 | -1.59 | 2.95E-02 | 1.01   | 9.86E-01 | BM390965  | Rn.38914 |
| 1 | 186561872 | 1393347_at | Itgal      | Integrin alpha L                                                          | 3.41  | 8.27E-06 | 2.64  | 3.50E-04 | 1.37  | 1.61E-01 | 3.07   | 1.42E-03 | BI289767  | Rn.16919 |
| 1 | 187040391 | 1393731_at | Rnf40      | ring finger protein 40                                                    | -1.68 | 2.38E-04 | -1.65 | 4.18E-03 | -1.39 | 3.85E-02 | -2.00  | 1.29E-03 | BF403369  | Rn.71174 |
| 1 | 187360436 | 1370379_at | Prss8      | protease, serine, 8 (prostasin)                                           | 1.18  | 4.43E-02 | -1.02 | 9.31E-01 | 1.01  | 9.95E-01 | -1.04  | 8.78E-01 | AF202076  | Rn.24211 |
| 1 | 187411479 | 1393068_at | ---        | Transcribed locus                                                         | 1.20  | 1.53E-01 | 1.02  | 9.70E-01 | 1.39  | 2.68E-01 | 1.91   | 4.54E-02 | AA956927  | Rn.9132  |
| 1 | 187614459 | 1367782_at | Cox6a2     | cytochrome c oxidase, subunit VIa, polypeptide 2                          | 1.19  | 5.00E-02 | 1.06  | 6.84E-01 | 1.01  | 9.89E-01 | 6.82   | 3.16E-01 | NM_012812 | Rn.5119  |
| 1 | 187656500 | 1370887_at | Tgfb1i1    | transforming growth factor beta 1 induced transcript 1                    | 1.20  | 3.36E-02 | 1.03  | 9.22E-01 | 1.05  | 9.85E-01 | 1.08   | 7.20E-01 | BI279862  | Rn.23203 |
| 1 | 187710576 | 1389160_at | Eraf       | erythroid associated factor                                               | -1.06 | 9.54E-01 | 1.91  | 4.11E-02 | 1.05  | 9.77E-01 | 1.42   | 7.76E-01 | AI230287  | Rn.12724 |
| 1 | 187953748 | 1390026_at | Bag3       | Bcl2-associated athanogene 3                                              | 1.03  | 8.65E-01 | -1.57 | 2.81E-02 | -1.00 | 9.97E-01 | -1.19  | 5.02E-01 | AI231792  | Rn.2699  |
| 1 | 188095194 | 1391312_at | Inpp5f     | inositol polyphosphate-5-phosphatase F                                    | 1.31  | 4.34E-02 | 1.17  | 1.80E-01 | 1.15  | 7.15E-01 | 1.40   | 1.37E-01 | BE108090  | Rn.51411 |
| 1 | 188192344 | 1380163_at | Sec23ip    | SEC23 interacting protein                                                 | -1.41 | 1.18E-03 | -1.36 | 1.65E-02 | -1.21 | 4.40E-01 | -1.37  | 9.98E-02 | BI302685  | Rn.51166 |
| 1 | 193333964 | 1380137_at | ---        | Transcribed locus                                                         | -1.07 | 6.06E-01 | -1.03 | 9.48E-01 | -1.53 | 2.26E-02 | 1.08   | 7.92E-01 | BF406176  | Rn.60916 |
| 1 | 193367639 | 1374323_at | ---        | Transcribed locus                                                         | -1.01 | 9.58E-01 | -1.26 | 2.12E-02 | -1.16 | 6.08E-01 | -1.08  | 6.25E-01 | BM389139  | Rn.7853  |
| 1 | 195421407 | 1371115_at | Ptpre      | protein tyrosine phosphatase, receptor type, E                            | -1.41 | 7.99E-03 | -1.08 | 6.87E-01 | -1.39 | 6.01E-01 | -1.91  | 2.85E-03 | D78610    | Rn.10766 |
| 1 | 195455253 | 1379313_at | ---        | Transcribed locus                                                         | 1.96  | 1.06E-04 | 1.28  | 3.77E-01 | 1.95  | 6.63E-03 | 2.45   | 8.31E-04 | BE108519  | ---      |
| 1 | 196779357 | 1368311_at | Mgmt       | O-6-methylguanine-DNA methyltransferase                                   | 2.27  | 3.34E-07 | 1.91  | 9.10E-06 | 1.80  | 1.60E-04 | 1.81   | 3.47E-04 | NM_012861 | Rn.9836  |
| 1 | 197265481 | 1382727_at | ---        | Transcribed locus                                                         | 1.48  | 5.08E-04 | 1.22  | 8.26E-02 | 1.22  | 9.54E-01 | 1.21   | 4.62E-01 | AI071140  | Rn.20024 |
| 1 | 197326005 | 1367870_at | Txn12      | thioredoxin-like 2                                                        | -1.08 | 3.80E-01 | -1.26 | 2.99E-02 | -1.13 | 8.31E-01 | -1.03  | 8.79E-01 | NM_032614 | Rn.3578  |
| 1 | 198123105 | 1391919_at | ---        | Similar to hypothetical protein LOC256536                                 | 1.19  | 4.30E-02 | 1.04  | 8.63E-01 | -1.04 | 9.74E-01 | -1.11  | 6.14E-01 | AW523472  | Rn.45649 |
| 1 | 198865303 | 1392252_at | ---        | Transcribed locus                                                         | -1.02 | 9.42E-01 | 1.10  | 7.54E-01 | -1.09 | 9.54E-01 | -1.94  | 2.82E-02 | AA819893  | Rn.37078 |
| 1 | 199033695 | 1377534_at | Stk32c     | Serine/threonine kinase 32C                                               | -3.94 | 3.13E-05 | 1.02  | 9.43E-01 | 1.08  | 9.55E-01 | -1.06  | 7.91E-01 | BE097305  | Rn.49654 |
| 1 | 201068525 | 1367871_at | Cyp2e1     | cytochrome P450, family 2, subfamily e, polypeptide 1                     | -1.06 | 8.03E-01 | -1.06 | 6.86E-01 | -2.43 | 2.20E-01 | -17.15 | 3.23E-03 | NM_031543 | Rn.1372  |
| 1 | 201153605 | 1393436_at | Scgb1c1    | secretoglobin, family 1C, member 1                                        | -1.39 | 1.12E-04 | 1.02  | 9.33E-01 | -1.00 | 9.98E-01 | 1.06   | 7.16E-01 | AI549033  | Rn.41707 |
| 1 | 201171387 | 1372925_at | Sirt3      | sirtuin 3                                                                 | -1.35 | 8.05E-02 | -2.04 | 1.34E-03 | -1.01 | 1.00E+00 | 1.19   | 3.64E-01 | AI233135  | Rn.24698 |
| 1 | 201242709 | 1394195_at | ---        | Transcribed locus                                                         | 1.19  | 3.14E-02 | 1.08  | 7.10E-01 | -1.00 | 9.98E-01 | 1.04   | 8.59E-01 | AI638983  | Rn.43897 |
| 1 | 201276888 | 1374831_at | Ath11      | acid trehalase-like 1                                                     | 1.59  | 1.48E-06 | -1.07 | 7.53E-01 | 1.10  | 9.74E-01 | -1.17  | 3.41E-01 | AI172579  | Rn.23728 |
| 1 | 201284348 | 1367696_at | lfitm2     | interferon induced transmembrane protein 2 (1-8D)                         | 1.14  | 4.46E-02 | 1.18  | 3.99E-01 | -1.16 | 9.55E-01 | -1.08  | 6.90E-01 | NM_030833 | Rn.2648  |
| 1 | 201438410 | 1378605_at | Sigirr     | single immunoglobulin and toll-interleukin 1 receptor domain              | -1.09 | 4.60E-01 | 2.00  | 6.90E-04 | -1.10 | 9.44E-01 | -1.13  | 6.62E-01 | AA818702  | Rn.16525 |
| 1 | 201447921 | 1393633_at | ---        | Transcribed locus weakly similar to tumor protein p53 inducible protein 5 | 1.29  | 4.26E-02 | -1.02 | 9.39E-01 | -1.01 | 9.92E-01 | 1.01   | 9.80E-01 | AI071826  | Rn.21998 |

|   |           |              |            |                                                                 |       |          |       |          |       |          |       |          |           |          |
|---|-----------|--------------|------------|-----------------------------------------------------------------|-------|----------|-------|----------|-------|----------|-------|----------|-----------|----------|
| 1 | 201505805 | 1394936_at   | Ptdss2     | Phosphatidylserine synthase 2                                   | 1.22  | 6.71E-03 | 1.21  | 2.98E-01 | 1.16  | 8.22E-01 | 1.39  | 8.40E-02 | AW521480  | Rn.69818 |
| 1 | 201506258 | 1385901_at   | ---        | Transcribed locus                                               | 1.63  | 1.06E-04 | 1.50  | 2.59E-03 | 1.59  | 3.10E-02 | 2.10  | 2.13E-03 | BE118197  | ---      |
| 1 | 201707420 | 1392324_at   | Eps8l2     | EPS8-like 2                                                     | -1.39 | 4.51E-02 | -1.22 | 3.51E-01 | -1.12 | 9.67E-01 | 1.02  | 9.14E-01 | AI137983  | Rn.23793 |
| 1 | 201714598 | 1372654_at   | Eps8l2     | EPS8-like 2                                                     | -1.37 | 2.49E-04 | -1.53 | 8.55E-03 | -1.30 | 6.39E-01 | -1.06 | 7.78E-01 | BI285918  | Rn.13824 |
| 1 | 201748707 | 1391202_at   | ---        | Transcribed locus strongly similar to protein D030034H08        | 2.54  | 6.25E-06 | 2.57  | 5.81E-06 | 1.24  | 2.52E-01 | 1.85  | 3.85E-03 | AW252232  | ---      |
| 1 | 201807314 | 1367681_at   | Cd151      | CD151 antigen                                                   | 1.20  | 3.49E-03 | 1.15  | 2.81E-01 | -1.09 | 9.74E-01 | 1.05  | 8.82E-01 | NM_022523 | Rn.1465  |
| 1 | 201836895 | 1383152_at   | Chid1      | chitinase domain containing 1                                   | -1.38 | 3.70E-03 | -1.51 | 1.71E-02 | -1.34 | 5.43E-01 | -1.20 | 4.14E-01 | BF544427  | Rn.27342 |
| 1 | 204340635 | 1379472_at   | Nadsyn1    | NAD synthetase 1                                                | 1.27  | 2.80E-02 | 1.34  | 1.16E-01 | 1.27  | 3.11E-01 | 1.35  | 1.61E-01 | AI232666  | Rn.22886 |
| 1 | 204402226 | 1368189_at   | Dhcr7      | 7-dehydrocholesterol reductase                                  | -1.16 | 4.69E-01 | 2.30  | 4.71E-03 | -1.02 | 9.90E-01 | 1.70  | 3.06E-01 | NM_022389 | Rn.228   |
| 1 | 205163016 | 1391199_at   | Fadd       | Fas (TNFRSF6)-associated via death domain                       | -1.31 | 1.35E-02 | -1.18 | 4.19E-01 | -1.03 | 9.87E-01 | -1.11 | 5.78E-01 | BE100715  | Rn.16183 |
| 1 | 205856421 | 1376313_at   | Tpcn2      | two pore segment channel 2                                      | -1.29 | 1.09E-02 | -2.68 | 6.89E-05 | -1.36 | 1.69E-01 | -1.98 | 8.31E-04 | BI296463  | Rn.27378 |
| 1 | 206725911 | 1389785_at   | Acy3       | aspartoacylase (aminoacylase) 3                                 | -1.16 | 1.27E-01 | -1.35 | 2.39E-02 | 1.24  | 5.82E-01 | 1.23  | 2.87E-01 | AA892933  | Rn.22552 |
| 1 | 206780855 | 1388122_at   | Gstp1      | glutathione-S-transferase, pi 1/pi 2                            | -1.18 | 2.93E-02 | -1.21 | 3.46E-01 | -1.02 | 9.83E-01 | -1.28 | 2.17E-01 | X02904    | Rn.44821 |
| 1 | 207056887 | 1399154_at   | Fbx11      | F-box and leucine-rich repeat protein 11                        | -1.11 | 4.17E-01 | -1.27 | 2.86E-02 | -1.07 | 9.55E-01 | -1.16 | 3.97E-01 | BF389273  | Rn.12228 |
| 1 | 207153791 | 1382197_at   | Rhod       | ras homolog gene family, member D                               | -1.03 | 7.84E-01 | -1.30 | 3.71E-02 | 1.07  | 9.48E-01 | -1.14 | 4.15E-01 | AA955648  | Rn.25197 |
| 1 | 207547786 | 1389080_at   | ---        | RNA binding motif protein 4                                     | -1.16 | 3.61E-02 | -1.35 | 3.83E-02 | -1.11 | 8.15E-01 | -1.30 | 1.74E-01 | AI233457  | Rn.8556  |
| 1 | 207557693 | 1384091_at   | ---        | Transcribed locus                                               | -1.47 | 7.21E-05 | -1.18 | 2.01E-01 | -1.15 | 7.25E-01 | -1.57 | 8.40E-02 | AA899909  | Rn.14995 |
| 1 | 207558819 | 1395762_at   | ---        | Transcribed locus weakly similar to LOC360381                   | -2.11 | 1.86E-06 | -1.66 | 1.20E-02 | -1.85 | 1.90E-03 | -1.73 | 1.51E-01 | BG670091  | Rn.72606 |
| 1 | 207710462 | 1382476_x_at | ---        | Transcribed locus                                               | 1.23  | 4.43E-02 | 1.26  | 1.22E-01 | -1.01 | 9.92E-01 | -1.05 | 8.90E-01 | AI060133  | ---      |
| 1 | 208630009 | 1371595_at   | ---        | Transcribed locus weakly similar to LOC360381                   | -1.23 | 7.57E-02 | -1.80 | 1.32E-03 | 1.01  | 9.94E-01 | -1.18 | 2.53E-01 | BM384301  | Rn.8145  |
| 1 | 208630791 | 1397164_at   | ---        | Transcribed locus weakly similar to LOC360381                   | -1.20 | 1.99E-01 | -2.57 | 2.07E-04 | 1.02  | 9.92E-01 | 1.05  | 8.92E-01 | AI175779  | Rn.55633 |
| 1 | 208701589 | 1389145_at   | Cdc42ep2   | CDC42 effector protein (Rho GTPase binding) 2                   | -1.13 | 3.09E-01 | -1.03 | 9.18E-01 | 1.82  | 2.82E-02 | -1.15 | 6.51E-01 | D86683    | Rn.17464 |
| 1 | 209062910 | 1368166_at   | Arl2       | ADP-ribosylation factor-like 2                                  | 1.05  | 6.82E-01 | 1.46  | 3.84E-03 | 1.01  | 9.91E-01 | 1.18  | 3.63E-01 | NM_031711 | Rn.36965 |
| 1 | 209160917 | 1377235_a_at | Ppp2r5b    | protein phosphatase 2, regulatory subunit B (B56), beta isoform | 1.32  | 2.54E-03 | -1.00 | 1.00E+00 | 1.04  | 9.74E-01 | -1.12 | 4.68E-01 | BI281643  | Rn.40996 |
| 1 | 209294583 | 1372756_at   | ---        | Mitogen activated protein kinase kinase kinase kinase 2         | -1.20 | 5.83E-02 | -1.09 | 6.65E-01 | -1.11 | 8.89E-01 | -1.73 | 1.98E-02 | BG378166  | ---      |
| 1 | 209479235 | 1396039_at   | ---        | Transcribed locus                                               | 1.29  | 3.29E-02 | 1.02  | 9.19E-01 | -1.01 | 9.95E-01 | 1.07  | 5.45E-01 | BG377396  | ---      |
| 1 | 209741843 | 1367677_at   | Prdx5      | peroxiredoxin 5                                                 | -1.02 | 8.52E-01 | -1.44 | 2.10E-03 | 1.09  | 9.54E-01 | 1.04  | 8.45E-01 | NM_053610 | Rn.2944  |
| 1 | 209814122 | 1380854_at   | ---        | Transcribed locus                                               | 1.84  | 4.80E-05 | 1.86  | 1.69E-02 | 1.58  | 4.56E-01 | 1.88  | 6.39E-03 | BF396482  | Rn.70676 |
| 1 | 209902080 | 1381774_at   | Lrp16      | LRP16 protein                                                   | -1.18 | 1.36E-01 | -1.26 | 4.02E-02 | -1.12 | 9.60E-01 | -1.11 | 5.98E-01 | BE095849  | Rn.26587 |
| 1 | 209918841 | 1384304_at   | Lrp16      | LRP16 protein                                                   | 1.19  | 4.55E-02 | 1.02  | 9.09E-01 | 1.00  | 1.00E+00 | 1.03  | 8.59E-01 | AW524615  | Rn.45890 |
| 1 | 210030010 | 1372958_at   | ---        | Transcribed locus strongly similar to HSPC263                   | -1.92 | 1.47E-06 | -1.43 | 2.69E-02 | -1.39 | 3.97E-02 | -1.49 | 1.42E-03 | BE111986  | Rn.35476 |
| 1 | 210030671 | 1399073_at   | Otub1      | OTU domain, ubiquitin aldehyde binding 1                        | -2.65 | 1.12E-07 | -2.16 | 7.49E-06 | -3.71 | 1.53E-04 | -1.93 | 1.54E-04 | BI274378  | ---      |
| 1 | 210267960 | 1373571_at   | Rtn3       | reticulon 3                                                     | -1.39 | 2.55E-04 | -1.06 | 7.74E-01 | -1.18 | 6.00E-01 | -1.30 | 1.48E-01 | AI170276  | Rn.37848 |
| 1 | 210376903 | 1384797_at   | ---        | Transcribed locus                                               | -1.02 | 9.25E-01 | -1.34 | 2.60E-02 | -1.33 | 8.34E-01 | 1.10  | 6.58E-01 | BF404325  | Rn.59545 |
| 1 | 210378419 | 1395980_at   | ---        | Similar to RIKEN cDNA 5730596K20                                | -1.05 | 7.42E-01 | -1.32 | 2.60E-02 | -1.15 | 9.15E-01 | -1.02 | 9.00E-01 | BF393243  | Rn.48295 |
| 1 | 210382751 | 1383835_at   | ---        | Transcribed locus                                               | -1.93 | 4.85E-05 | -2.55 | 7.68E-05 | -1.43 | 3.83E-01 | -4.44 | 3.04E-06 | BI303704  | Rn.32756 |
| 1 | 210777138 | 1369840_at   | RGD:620976 | integral membrane transport protein UST4r                       | -1.08 | 3.92E-01 | 1.53  | 1.62E-02 | 1.05  | 9.61E-01 | 1.13  | 5.10E-01 | NM_134379 | Rn.81213 |
| 1 | 210918867 | 1369450_at   | RGD:620985 | integral membrane transport protein UST5r                       | 1.72  | 9.69E-05 | 1.13  | 2.96E-01 | -1.01 | 9.94E-01 | -1.04 | 7.92E-01 | NM_134380 | Rn.81214 |
| 1 | 211446536 | 1385005_at   | ---        | Transcribed locus                                               | 2.09  | 2.21E-06 | 1.54  | 1.11E-01 | 1.02  | 9.87E-01 | 1.00  | 9.90E-01 | AW530264  | ---      |
| 1 | 211676320 | 1371811_at   | Bscl2      | Bernardinelli-Seip congenital lipodystrophy 2 homolog           | 1.19  | 3.65E-02 | 1.05  | 8.02E-01 | 1.03  | 9.79E-01 | -1.04 | 8.86E-01 | BI278232  | ---      |
| 1 | 211774518 | 1373527_at   | ---        | Transcribed locus                                               | -1.38 | 3.04E-04 | -1.26 | 9.65E-02 | -1.33 | 5.43E-01 | -1.69 | 2.13E-03 | BI275677  | Rn.11674 |

|   |           |              |         |                                                                                                |       |          |       |          |       |          |       |          |           |          |
|---|-----------|--------------|---------|------------------------------------------------------------------------------------------------|-------|----------|-------|----------|-------|----------|-------|----------|-----------|----------|
| 1 | 212346271 | 1377869_at   | ---     | Similar to carbon catabolite repression 4 protein homolog                                      | 1.42  | 4.44E-02 | 7.16  | 4.73E-02 | 1.12  | 9.74E-01 | -1.56 | 2.03E-01 | BI284261  | Rn.15040 |
| 1 | 212482220 | 1391477_at   | ---     | Transcribed locus                                                                              | -1.67 | 2.94E-04 | -1.13 | 4.15E-01 | -1.11 | 9.07E-01 | -1.13 | 5.11E-01 | BF396595  | ---      |
| 1 | 212670777 | 1368453_at   | Fads2   | fatty acid desaturase 2                                                                        | -1.04 | 8.07E-01 | 1.69  | 3.93E-03 | 1.00  | 1.00E+00 | 1.08  | 7.61E-01 | NM_031344 | Rn.32872 |
| 1 | 212829200 | 1367857_at   | Fads1   | fatty acid desaturase 1                                                                        | 1.48  | 1.20E-02 | 2.31  | 6.44E-05 | -1.07 | 9.83E-01 | 1.08  | 7.54E-01 | NM_053445 | Rn.28161 |
| 1 | 213449268 | 1384981_at   | Cd6     | CD6 antigen                                                                                    | -1.05 | 7.03E-01 | 1.07  | 7.15E-01 | 3.01  | 3.13E-06 | -1.00 | 9.94E-01 | BM384254  | Rn.57361 |
| 1 | 213697961 | 1377626_at   | ---     | Transcribed locus                                                                              | -1.57 | 3.25E-02 | -1.25 | 7.59E-01 | -1.44 | 2.11E-01 | -1.30 | 5.74E-01 | AA924350  | ---      |
| 1 | 215546341 | 1369427_at   | Mpeg1   | macrophage expressed gene 1                                                                    | 1.10  | 7.27E-01 | -3.61 | 2.67E-03 | 1.04  | 9.94E-01 | 1.15  | 7.86E-01 | NM_022617 | Rn.48702 |
| 1 | 215549786 | 1389006_at   | Mpeg1   | Macrophage expressed gene 1                                                                    | 1.21  | 2.41E-01 | -3.23 | 4.27E-03 | 1.17  | 9.91E-01 | 1.24  | 7.41E-01 | AI170394  | Rn.4301  |
| 1 | 215824004 | 1391652_at   | ---     | Transcribed locus                                                                              | -1.29 | 1.06E-04 | -1.37 | 2.39E-02 | -1.11 | 9.38E-01 | -1.03 | 9.25E-01 | AI411140  | Rn.21872 |
| 1 | 215826644 | 1380905_at   | ---     | Transcribed locus weakly similar to RIKEN 5830411J07                                           | -1.16 | 4.01E-01 | -1.39 | 2.77E-02 | 1.03  | 9.74E-01 | -1.02 | 9.24E-01 | AA893260  | Rn.40554 |
| 1 | 215919898 | 1370592_at   | Keg1    | kidney expressed gene 1                                                                        | -1.93 | 4.09E-06 | -1.34 | 1.56E-01 | 1.03  | 9.74E-01 | 1.06  | 6.65E-01 | AB019693  | Rn.22745 |
| 1 | 219430819 | 1381749_at   | ---     | Transcribed locus                                                                              | -1.31 | 5.70E-03 | 1.11  | 4.74E-01 | -1.07 | 8.90E-01 | 1.10  | 7.78E-01 | AI703743  | Rn.40793 |
| 1 | 219432441 | 1372665_at   | ---     | Transcribed locus                                                                              | -1.06 | 5.26E-01 | 1.97  | 6.32E-04 | -1.01 | 9.98E-01 | 1.15  | 5.08E-01 | AI230228  | Rn.30218 |
| 1 | 219483445 | 1369433_at   | Cep78   | centrosomal protein 78                                                                         | -1.41 | 2.64E-04 | 1.04  | 8.89E-01 | 1.02  | 9.88E-01 | -1.25 | 1.81E-01 | NM_021741 | Rn.42936 |
| 1 | 220070142 | 1393825_at   | ---     | TGFB inducible early growth response 3                                                         | -1.68 | 1.18E-03 | -1.05 | 7.91E-01 | -1.03 | 9.74E-01 | -1.03 | 8.89E-01 | AI454854  | Rn.35127 |
| 1 | 220146892 | 1381557_at   | ---     | TGFB inducible early growth response 3                                                         | -3.07 | 5.30E-07 | 1.05  | 9.13E-01 | -1.20 | 8.89E-01 | -1.09 | 5.40E-01 | BI289045  | Rn.73873 |
| 1 | 222420824 | 1392994_at   | ---     | Similar to Enolase 1                                                                           | 1.17  | 8.04E-02 | 1.91  | 8.53E-03 | 1.15  | 5.92E-01 | 1.53  | 5.14E-02 | AW522671  | Rn.19716 |
| 1 | 223642130 | 1367614_at   | Anxa1   | annexin A1                                                                                     | -1.27 | 1.75E-03 | -1.04 | 9.42E-01 | -1.16 | 9.76E-01 | 1.28  | 2.16E-01 | NM_012904 | Rn.1792  |
| 1 | 223657605 | 1394451_at   | Anxa1   | annexin A1                                                                                     | -1.38 | 1.95E-02 | 1.17  | 3.83E-01 | -1.43 | 8.90E-01 | 1.04  | 9.50E-01 | AI236455  | Rn.63926 |
| 1 | 223895680 | 1368718_at   | Aldh1a4 | aldehyde dehydrogenase family 1, subfamily A4                                                  | 1.21  | 8.78E-02 | 57.68 | 2.78E-09 | 1.32  | 3.83E-01 | 3.05  | 1.17E-01 | M23995    | Rn.74044 |
| 1 | 223895697 | 1387022_at   | Aldh1a1 | aldehyde dehydrogenase family 1, member A1                                                     | -1.20 | 2.70E-03 | -1.96 | 6.77E-03 | 1.28  | 8.89E-01 | 1.02  | 9.94E-01 | NM_022407 | Rn.6132  |
| 1 | 224611744 | 1388868_at   | Zfp216  | zinc finger protein 216                                                                        | -1.30 | 1.18E-03 | -1.21 | 2.16E-01 | -1.04 | 9.66E-01 | 1.04  | 9.40E-01 | AI172425  | Rn.4050  |
| 1 | 224614398 | 1383905_at   | ---     | Transcribed locus                                                                              | -1.53 | 5.25E-04 | -1.36 | 2.59E-02 | -1.37 | 6.31E-02 | -1.14 | 7.78E-01 | BF401729  | Rn.17596 |
| 1 | 225262131 | 1394160_at   | ---     | Transmembrane protein 2                                                                        | -2.84 | 5.00E-06 | -4.63 | 6.02E-08 | -5.21 | 3.13E-06 | -5.78 | 2.91E-05 | AI101945  | Rn.28119 |
| 1 | 229028588 | 1372069_at   | Ankrd15 | ankyrin repeat domain 15                                                                       | -1.25 | 5.40E-03 | -1.11 | 6.82E-01 | -1.09 | 7.29E-01 | -1.21 | 2.07E-01 | BF284716  | Rn.2191  |
| 1 | 232764894 | 1373083_at   | ---     | Similar to hypothetical protein FLJ10058                                                       | 1.03  | 8.39E-01 | 1.33  | 3.64E-02 | -1.04 | 9.85E-01 | 1.07  | 8.34E-01 | AW915681  | Rn.7335  |
| 1 | 232816523 | 1374074_at   | Cdc37l  | cell division cycle 37 homolog (S. cerevisiae)-like                                            | -1.14 | 1.72E-01 | -1.49 | 3.21E-03 | -1.23 | 9.08E-02 | -1.09 | 6.28E-01 | BF285292  | Rn.19147 |
| 1 | 232822760 | 1368095_at   | ---     | Transcribed locus                                                                              | 1.18  | 1.22E-02 | -1.00 | 1.00E+00 | 1.12  | 6.01E-01 | -1.03 | 9.53E-01 | NM_013218 | ---      |
| 1 | 232842713 | 1375577_at   | ---     | Transcribed locus                                                                              | 1.31  | 2.44E-02 | 1.26  | 5.36E-02 | 1.35  | 6.01E-01 | 1.27  | 2.16E-01 | BF400031  | ---      |
| 1 | 233488233 | 1383992_at   | ---     | Transcribed locus                                                                              | -1.31 | 1.57E-02 | -1.16 | 3.34E-01 | 1.00  | 1.00E+00 | -1.19 | 3.54E-01 | BM383990  | ---      |
| 1 | 233490983 | 1388889_at   | Ermp1   | endoplasmic reticulum metalloproteinase 1                                                      | -1.61 | 1.68E-06 | -1.88 | 9.10E-06 | -1.54 | 1.61E-03 | -1.75 | 1.29E-04 | AI598417  | Rn.7753  |
| 1 | 233493258 | 1384975_at   | Ermp1   | endoplasmic reticulum metalloproteinase 1                                                      | 1.31  | 1.04E-03 | 1.24  | 2.16E-01 | 1.10  | 8.92E-01 | 1.43  | 7.06E-02 | BM387447  | Rn.81999 |
| 1 | 233573321 | 1390596_at   | Mlana   | melan-A                                                                                        | -2.09 | 3.31E-05 | -1.04 | 8.88E-01 | 1.03  | 9.80E-01 | -1.20 | 6.19E-01 | BG378791  | Rn.12340 |
| 1 | 233845989 | 1389581_at   | Il33    | interleukin 33                                                                                 | 1.06  | 7.69E-01 | -4.82 | 1.99E-07 | -1.13 | 9.60E-01 | 1.07  | 7.99E-01 | BF390510  | Rn.51945 |
| 1 | 233848805 | 1373970_at   | Il33    | interleukin 33                                                                                 | 1.02  | 8.77E-01 | -4.38 | 1.56E-07 | -1.10 | 9.64E-01 | 1.01  | 9.90E-01 | AI716248  | Rn.1927  |
| 1 | 233911139 | 1378702_at   | ---     | Transcribed locus                                                                              | 1.05  | 7.35E-01 | 1.65  | 4.91E-03 | -1.01 | 9.95E-01 | 1.02  | 9.45E-01 | BF413730  | Rn.62443 |
| 1 | 234004644 | 1373117_at   | ---     | Transcribed locus strongly similar to ubiquitin-like containing PHD and RING finger domains, 2 | 1.20  | 6.44E-02 | 2.22  | 1.42E-06 | -1.03 | 9.74E-01 | -1.22 | 3.20E-01 | BI275765  | Rn.2173  |
| 1 | 234010715 | 1379334_at   | Gldc    | Glycine dehydrogenase                                                                          | -1.32 | 5.40E-03 | 1.01  | 9.85E-01 | -1.02 | 9.79E-01 | -1.07 | 7.69E-01 | BF547086  | Rn.7547  |
| 1 | 234011046 | 1376427_a_at | ---     | Transcribed locus                                                                              | -2.03 | 1.18E-03 | 1.11  | 7.51E-01 | 1.00  | 9.97E-01 | -1.02 | 9.55E-01 | AI029729  | Rn.17101 |
| 1 | 234148696 | 1379240_at   | ---     | Transcribed locus                                                                              | 1.02  | 9.29E-01 | 1.34  | 8.00E-03 | 1.01  | 9.97E-01 | -1.00 | 9.96E-01 | AA893453  | ---      |
| 1 | 236029865 | 1368784_at   | Acf     | apobec-1 complementation factor                                                                | -2.41 | 8.27E-06 | -4.38 | 3.65E-06 | 1.01  | 9.97E-01 | 1.05  | 7.78E-01 | NM_133400 | Rn.81027 |



|   |           |              |             |                                                                    |       |          |       |          |       |          |       |          |           |          |
|---|-----------|--------------|-------------|--------------------------------------------------------------------|-------|----------|-------|----------|-------|----------|-------|----------|-----------|----------|
| 1 | 237532482 | 1381816_at   | ---         | Similar to hypothetical protein FLJ11218                           | 1.26  | 2.63E-02 | 1.12  | 5.61E-01 | 1.18  | 3.30E-01 | 1.11  | 4.96E-01 | BE119617  | Rn.57170 |
| 1 | 237801122 | 1382008_at   | ---         | Similar to hypothetical protein FLJ11218                           | 1.35  | 7.21E-05 | 1.07  | 7.02E-01 | 1.03  | 9.91E-01 | 1.14  | 5.04E-01 | AI044348  | Rn.15885 |
| 1 | 238436908 | 1384842_s_at | Fas         | Tumor necrosis factor receptor superfamily, member 6               | 1.01  | 9.85E-01 | -2.30 | 9.22E-03 | -1.27 | 5.06E-01 | 1.02  | 9.47E-01 | AI231531  | Rn.24581 |
| 1 | 238630381 | 1368075_at   | Lipa        | lipase A, lysosomal acid                                           | -1.01 | 9.63E-01 | -1.43 | 4.71E-03 | -1.09 | 9.74E-01 | 1.06  | 7.14E-01 | NM_012732 | Rn.48656 |
| 1 | 238773058 | 1369836_at   | lfit1       | interferon-induced protein - tetratricopeptide repeats 1           | 1.70  | 3.68E-01 | 2.08  | 3.89E-01 | 1.64  | 3.88E-01 | 4.29  | 3.06E-02 | NM_020096 | Rn.48677 |
| 1 | 239134330 | 1395503_at   | Ears2       | glutamyl-tRNA synthetase 2 mitochondrial                           | 1.12  | 2.71E-01 | -1.04 | 8.51E-01 | 1.29  | 4.96E-02 | 1.17  | 5.45E-01 | BF564382  | Rn.48264 |
| 1 | 241907434 | 1385619_at   | Kif11       | kinesin-like 1                                                     | 1.44  | 8.02E-03 | -1.02 | 9.59E-01 | 1.04  | 9.85E-01 | -1.02 | 9.67E-01 | BF562797  | Rn.12560 |
| 1 | 241911796 | 1390891_at   | Kif11       | Kinesin-like 1                                                     | 1.46  | 2.51E-04 | -1.04 | 8.75E-01 | -1.23 | 9.54E-01 | 1.11  | 5.08E-01 | BE116384  | Rn.12560 |
| 1 | 242399258 | 1375857_at   | Fer1I3      | Myoferlin (Fer-1 like protein 3)                                   | 1.27  | 2.89E-02 | 1.44  | 1.96E-02 | 1.17  | 9.74E-01 | 1.24  | 3.88E-01 | AW917760  | Rn.8225  |
| 1 | 242637190 | 1371762_at   | Rbp4        | retinol binding protein 4, plasma                                  | -2.74 | 5.04E-06 | 1.02  | 9.17E-01 | 1.06  | 9.89E-01 | 1.26  | 3.76E-01 | AA858962  | Rn.35762 |
| 1 | 243377878 | 1387328_at   | Cyp2c       | Cytochrome P450, subfamily IIC (mephenytoin 4-hydroxylase)         | -7.11 | 8.23E-04 | 1.05  | 7.87E-01 | -1.05 | 9.63E-01 | 1.01  | 9.77E-01 | NM_019184 | Rn.10870 |
| 1 | 243955564 | 1370580_a_at | Cyp2c37     | cytochrome P450, 2c37                                              | 1.04  | 8.80E-01 | -1.34 | 1.75E-02 | -1.02 | 9.89E-01 | 1.01  | 9.78E-01 | M18336    | Rn.7245  |
| 1 | 245606005 | 1380940_at   | ---         | Transcribed locus                                                  | -1.09 | 7.16E-01 | -1.45 | 4.88E-02 | 1.26  | 6.30E-01 | -1.23 | 4.00E-01 | BF402603  | Rn.60083 |
| 1 | 246526313 | 1380053_at   | ---         | Transcribed locus strongly similar to transmembrane protein TM9SF3 | -1.31 | 8.98E-03 | -1.42 | 2.99E-02 | -1.33 | 1.80E-01 | -1.18 | 2.86E-01 | BF397371  | Rn.63785 |
| 1 | 246527703 | 1379627_at   | Tm9sf3      | transmembrane 9 superfamily member 3                               | -1.16 | 2.22E-01 | -1.30 | 3.20E-02 | -1.30 | 5.02E-01 | -1.04 | 8.97E-01 | AW534630  | Rn.38604 |
| 1 | 246892433 | 1390719_at   | ---         | Transcribed locus                                                  | -1.44 | 6.44E-02 | -1.59 | 2.77E-02 | -1.20 | 7.08E-01 | -1.53 | 2.11E-01 | BI294889  | Rn.21735 |
| 1 | 247199740 | 1382155_at   | ---         | Transcribed locus                                                  | 7.02  | 2.21E-09 | 4.23  | 1.99E-07 | 8.22  | 2.87E-09 | 3.94  | 8.10E-05 | AA875055  | Rn.32203 |
| 1 | 247207051 | 1397902_at   | ---         | Transcribed locus                                                  | 1.68  | 3.46E-03 | 1.48  | 1.63E-02 | 1.70  | 5.12E-02 | 1.32  | 1.21E-01 | BF548780  | ---      |
| 1 | 247210645 | 1391441_at   | ---         | Transcribed locus                                                  | -1.47 | 1.32E-03 | -1.31 | 2.44E-01 | -1.15 | 9.15E-01 | -1.55 | 1.30E-02 | AA899943  | Rn.8955  |
| 1 | 247464374 | 1390815_at   | ---         | Transcribed locus                                                  | 1.49  | 6.49E-03 | 1.11  | 5.43E-01 | 1.04  | 9.74E-01 | 1.10  | 5.76E-01 | BF282870  | Rn.28026 |
| 1 | 248246887 | 1382699_s_at | Hps1        | Hermansky-Pudlak syndrome 1 homolog                                | -1.28 | 1.56E-03 | -1.79 | 6.35E-03 | -1.09 | 9.67E-01 | 1.31  | 8.40E-02 | AW920326  | Rn.49280 |
| 1 | 248272489 | 1398031_at   | ---         | Transcribed locus                                                  | 1.27  | 4.07E-03 | 1.43  | 8.55E-03 | 1.15  | 6.23E-01 | 1.23  | 1.28E-01 | BF406285  | Rn.59908 |
| 1 | 248275767 | 1378802_at   | RGD:1303232 | Phytn_dehydro and Pyr_redox domain containing protein              | 1.44  | 1.31E-04 | 3.18  | 1.34E-06 | 1.40  | 6.58E-03 | 1.98  | 1.46E-03 | AI105366  | Rn.33808 |
| 1 | 248818538 | 1368381_at   | Crtac1      | cartilage acidic protein 1                                         | 1.13  | 3.62E-01 | 1.05  | 8.52E-01 | 1.09  | 9.35E-01 | 1.70  | 1.79E-02 | NM_134401 | Rn.15989 |
| 1 | 248964264 | 1372342_at   | Mrvldc1     | MARVEL (membrane-associating) domain containing 1                  | 1.03  | 8.43E-01 | 1.37  | 3.06E-02 | 1.13  | 9.41E-01 | 1.13  | 7.42E-01 | AI176583  | Rn.1215  |
| 1 | 248986211 | 1370252_at   | ---         | Transcribed locus                                                  | 1.22  | 2.25E-03 | 1.19  | 3.47E-01 | 1.01  | 9.95E-01 | 1.10  | 6.49E-01 | BI282724  | Rn.13633 |
| 1 | 249076556 | 1393126_at   | Ubtb1       | ubiquitin domain containing 1                                      | 1.08  | 4.37E-01 | 1.21  | 4.82E-02 | 1.25  | 2.61E-01 | -1.05 | 8.03E-01 | BI293253  | Rn.41952 |
| 1 | 249351593 | 1398473_at   | ---         | Transcribed locus                                                  | 1.24  | 2.95E-03 | 1.28  | 5.40E-02 | 1.15  | 5.43E-01 | 1.16  | 2.72E-01 | BI290651  | Rn.19119 |
| 1 | 249454987 | 1371580_at   | ---         | Similar to band 7 protein (35.3 kD) (4N53)                         | 1.22  | 1.55E-02 | 1.12  | 5.50E-01 | 1.06  | 9.70E-01 | -1.02 | 9.56E-01 | AI102725  | Rn.36741 |
| 1 | 249616941 | 1386889_at   | Scd2        | stearoyl-Coenzyme A desaturase 2                                   | -1.56 | 1.77E-03 | -1.05 | 8.01E-01 | 1.08  | 9.76E-01 | 1.11  | 8.00E-01 | BE107760  | Rn.2627  |
| 1 | 249616941 | 1367668_a_at | Scd2        | stearoyl-Coenzyme A desaturase 2                                   | -2.32 | 5.88E-07 | -1.23 | 3.62E-01 | -1.15 | 9.74E-01 | -1.02 | 9.80E-01 | NM_031841 | Rn.2627  |
| 1 | 249717541 | 1370355_at   | Scd1        | stearoyl-Coenzyme A desaturase 1                                   | 2.31  | 3.32E-01 | 14.72 | 3.50E-04 | 2.75  | 5.43E-01 | 4.56  | 3.63E-01 | J02585    | Rn.1023  |
| 1 | 249857514 | 1375628_at   | Ndufb8      | NADH dehydrogenase (ubiquinone) 1b subcomplex 8                    | -1.22 | 8.02E-03 | -1.18 | 2.08E-01 | -1.11 | 9.54E-01 | 1.03  | 9.43E-01 | AI059654  | Rn.3383  |
| 1 | 250338099 | 1398472_at   | Peo1        | progressive external ophthalmoplegia 1                             | 1.98  | 1.86E-06 | 2.13  | 9.10E-06 | 1.88  | 1.60E-04 | 1.86  | 2.31E-03 | AA925995  | Rn.44164 |
| 1 | 251226644 | 1383025_at   | ---         | Transcribed locus                                                  | -1.07 | 7.03E-01 | -1.26 | 4.22E-02 | -1.07 | 9.55E-01 | -1.14 | 4.88E-01 | BE097791  | Rn.41557 |
| 1 | 251269244 | 1373987_at   | Kcnip2      | Kv channel-interacting protein 2                                   | -1.06 | 7.72E-01 | -1.11 | 5.93E-01 | -1.43 | 6.82E-01 | -1.79 | 4.84E-02 | AI410448  | ---      |
| 1 | 251294346 | 1374960_at   | ---         | Similar to 9130011E15Rik protein                                   | 1.58  | 1.87E-03 | 1.16  | 3.07E-01 | 1.83  | 5.46E-05 | 1.45  | 2.41E-01 | BM390080  | Rn.8704  |
| 1 | 251295100 | 1384117_at   | ---         | Similar to 9130011E15Rik protein                                   | 1.43  | 8.35E-04 | 1.16  | 3.80E-01 | 1.58  | 1.09E-03 | 1.24  | 2.16E-01 | BF555676  | Rn.23632 |
| 1 | 251958407 | 1385042_at   | LOC361769   | similar to Su(fu) protein                                          | -1.25 | 4.46E-02 | 1.03  | 9.03E-01 | -1.12 | 9.30E-01 | -1.11 | 4.84E-01 | BM387871  | Rn.82107 |
| 1 | 252160167 | 1390543_at   | ---         | Transcribed locus                                                  | 1.08  | 6.37E-01 | 1.37  | 1.97E-02 | 1.10  | 9.55E-01 | 1.08  | 6.32E-01 | BF396416  | Rn.8770  |
| 1 | 252228606 | 1387123_at   | Cyp17a1     | cytochrome P450, family 17, subfamily a, polypeptide 1             | -1.03 | 9.06E-01 | -     | 2.96E-09 | 1.05  | 9.60E-01 | 1.01  | 9.75E-01 | NM_012753 | Rn.10172 |

|   |           |              |           |                                                         |       | 18.13    |       |          |       |          |       |          |           |          |
|---|-----------|--------------|-----------|---------------------------------------------------------|-------|----------|-------|----------|-------|----------|-------|----------|-----------|----------|
| 1 | 252467278 | 1391413_at   | Nt5c2     | 5'-nucleotidase, cytosolic II                           | 1.42  | 1.56E-03 | 1.07  | 8.03E-01 | 1.18  | 8.63E-01 | 1.08  | 6.39E-01 | BM387140  | Rn.25070 |
| 1 | 252622559 | 1389760_at   | Rnf134    | ring finger protein 134                                 | -1.14 | 2.44E-01 | -1.72 | 1.32E-03 | -1.42 | 5.11E-01 | -1.74 | 2.80E-03 | AA858786  | Rn.16897 |
| 1 | 253140049 | 1373295_at   | Obfc1     | oligonucleotide/oligosaccharide-binding fold            | 1.04  | 8.68E-01 | -1.11 | 4.82E-01 | 2.83  | 1.09E-03 | 1.10  | 4.69E-01 | BI281889  | Rn.15899 |
| 1 | 253498365 | 1389832_at   | Gsto1     | glutathione S-transferase omega 1                       | 1.01  | 9.07E-01 | 1.71  | 2.00E-05 | 1.17  | 3.04E-01 | 1.13  | 3.88E-01 | BE113459  | ---      |
| 1 | 259355566 | 1370160_at   | Xpnpep1   | X-prolyl aminopeptidase (aminopeptidase P) 1, soluble   | 1.04  | 8.22E-01 | 1.25  | 3.71E-02 | -1.02 | 9.88E-01 | -1.05 | 7.43E-01 | AI178742  | Rn.25763 |
| 1 | 259720176 | 1368963_at   | Mxi1      | Max interacting protein 1                               | 1.32  | 7.25E-04 | 1.05  | 8.01E-01 | 1.13  | 9.38E-01 | 1.15  | 4.10E-01 | NM_013160 | Rn.37510 |
| 1 | 259800723 | 1372093_at   | Mxi1      | Max interacting protein 1                               | 1.26  | 5.25E-04 | 1.15  | 3.84E-01 | 1.13  | 9.30E-01 | 1.06  | 8.59E-01 | AI409308  | Rn.1297  |
| 1 | 261578072 | 1372452_at   | Gpam      | Glycerol-3-phosphate acyltransferase, mitochondrial     | -1.33 | 2.29E-02 | -1.44 | 1.03E-01 | 1.10  | 9.60E-01 | 1.05  | 8.01E-01 | BG666882  | Rn.8234  |
| 1 | 261580925 | 1382986_at   | ---       | Transcribed locus                                       | -1.34 | 1.18E-03 | -1.58 | 5.36E-02 | 1.11  | 9.60E-01 | 1.14  | 5.36E-01 | BI288209  | Rn.36575 |
| 1 | 261581210 | 1369758_at   | Gpam      | Glycerol-3-phosphate acyltransferase, mitochondrial     | -1.15 | 2.29E-01 | -1.41 | 4.49E-02 | 1.10  | 9.74E-01 | 1.27  | 3.20E-01 | U36771    | Rn.44456 |
| 1 | 263033222 | 1383495_at   | Dclre1a   | DNA cross-link repair 1A, PSO2 homolog                  | 1.05  | 6.41E-01 | -1.37 | 1.23E-02 | -1.05 | 9.74E-01 | 1.00  | 9.90E-01 | AI556858  | Rn.7714  |
| 1 | 264023960 | 1382151_at   | Trub1     | TruB pseudouridine (psi) synthase homolog 1             | -1.21 | 5.40E-03 | -1.01 | 9.78E-01 | -1.10 | 9.62E-01 | -1.17 | 4.19E-01 | AI145625  | Rn.24324 |
| 1 | 264698911 | 1388738_at   | ---       | Similar to KIAA0534 protein                             | 1.27  | 5.63E-04 | 1.67  | 7.53E-02 | 1.21  | 8.80E-01 | -1.05 | 8.50E-01 | AI411227  | Rn.12950 |
| 1 | 265516187 | 1373480_at   | ---       | Transcribed locus                                       | -1.42 | 4.52E-03 | 1.02  | 9.42E-01 | -1.07 | 9.49E-01 | -1.78 | 1.16E-01 | BG670210  | Rn.18598 |
| 1 | 266184962 | 1385185_at   | ---       | Transcribed locus                                       | 1.56  | 1.44E-03 | -1.01 | 9.80E-01 | 2.73  | 1.90E-03 | 1.23  | 1.28E-01 | BF388679  | ---      |
| 1 | 267340629 | 1389298_at   | ---       | Similar to 2700078E11Rik protein                        | -1.23 | 3.29E-03 | -1.40 | 5.49E-02 | -1.29 | 2.00E-02 | -1.37 | 1.07E-01 | AI412864  | Rn.13358 |
| 1 | ---       | 1389527_at   | LOC378467 | promethin                                               | 1.30  | 8.57E-04 | 1.33  | 2.16E-01 | 1.60  | 8.67E-05 | 1.39  | 1.46E-01 | BM384073  | Rn.7304  |
| 1 | ---       | 1374657_at   | ---       | Similar to RIKEN 1810020D17                             | 1.17  | 4.46E-02 | -1.11 | 6.50E-01 | -1.02 | 9.89E-01 | 1.06  | 8.19E-01 | AA848437  | Rn.6362  |
| 1 | ---       | 1384151_at   | Sirt3     | Sirtuin 3                                               | -1.23 | 1.09E-02 | 1.05  | 7.94E-01 | -1.17 | 5.94E-01 | -1.24 | 1.18E-01 | AI578392  | Rn.18788 |
| 1 | ---       | 1368497_at   | Abcc2     | ATP-binding cassette, sub-family C (CFTR/MRP), member 2 | 1.49  | 1.56E-03 | -1.15 | 5.51E-01 | 1.04  | 9.74E-01 | 1.15  | 3.88E-01 | NM_012833 | Rn.10265 |
| 2 | ---       | 1368512_a_at | Enpep     | glutamyl aminopeptidase                                 | -1.06 | 6.36E-01 | 1.33  | 2.15E-02 | -1.13 | 8.89E-01 | -1.25 | 1.80E-01 | AF214568  | Rn.53979 |
| 2 | ---       | 1383248_at   | Fmo5      | flavin containing monooxygenase 5                       | -1.23 | 1.17E-01 | -1.29 | 2.57E-02 | -1.17 | 8.20E-01 | -1.11 | 5.65E-01 | AI454611  | Rn.7038  |
| 2 | 180397196 | 1378929_at   | ---       | Transcribed locus                                       | -1.21 | 4.88E-02 | -1.08 | 7.22E-01 | 1.13  | 9.54E-01 | -1.12 | 5.14E-01 | BE116137  | Rn.16728 |
| 2 | 192343763 | 1382611_at   | ---       | Transcribed locus                                       | -1.03 | 8.80E-01 | -1.37 | 4.54E-02 | 1.00  | 1.00E+00 | -1.04 | 8.25E-01 | AA945938  | Rn.24100 |
| 2 | 199210309 | 1398866_at   | Magi3     | membrane-associated guanylate kinase-related            | -1.06 | 6.84E-01 | -1.29 | 3.62E-02 | -1.10 | 9.74E-01 | -1.15 | 5.70E-01 | AF255614  | Rn.22579 |
| 2 | 210152887 | 1392915_at   | Col11a1   | Procollagen, type XI, alpha 1                           | 1.21  | 1.71E-02 | -1.03 | 9.18E-01 | -1.25 | 9.54E-01 | 1.08  | 6.11E-01 | BM389291  | Rn.260   |
| 2 | 229621058 | 1385444_at   | ---       | Transcribed locus                                       | -1.17 | 4.74E-02 | -1.04 | 8.54E-01 | 1.24  | 8.82E-01 | 1.20  | 5.61E-01 | AI071994  | ---      |
| 2 | 234116850 | 1368277_at   | Ppp3ca    | protein phosphatase 3, catalytic subunit, alpha isoform | 1.04  | 6.91E-01 | -1.28 | 2.08E-02 | -1.06 | 9.44E-01 | 1.03  | 9.20E-01 | NM_017041 | Rn.6866  |
| 2 | 240864081 | 1368220_at   | Gtf2b     | general transcription factor IIB                        | 1.01  | 9.29E-01 | -1.30 | 3.86E-02 | 1.02  | 9.91E-01 | -1.01 | 9.68E-01 | NM_031041 | Rn.6109  |
| 2 | 244624597 | 1373146_at   | Ssx2ip    | synovial sarcoma, X breakpoint 2 interacting protein    | 1.03  | 8.15E-01 | 1.31  | 3.83E-02 | 1.09  | 9.67E-01 | 1.06  | 8.09E-01 | AI716240  | Rn.21417 |
| 2 | 247417022 | 1382780_at   | ---       | Transcribed locus                                       | 1.06  | 7.50E-01 | -1.51 | 8.66E-03 | 1.10  | 9.05E-01 | 1.02  | 9.45E-01 | AI059229  | Rn.21060 |
| 2 | 31239665  | 1398281_at   | Tpmt      | thiopurine methyltransferase                            | -1.00 | 9.86E-01 | -1.38 | 4.46E-02 | -1.02 | 9.87E-01 | 1.13  | 4.84E-01 | NM_031329 | Rn.31429 |
| 2 | 46469312  | 1372750_at   | Fst       | Follistatin                                             | 1.15  | 4.03E-01 | 1.05  | 7.94E-01 | -1.37 | 2.55E-02 | -1.41 | 4.58E-01 | AI102517  | Rn.2743  |
| 2 | 53619481  | 1384580_at   | ---       | Transcribed locus                                       | -1.01 | 9.58E-01 | 1.36  | 1.83E-01 | -1.30 | 8.96E-01 | 2.57  | 4.30E-03 | AI045191  | Rn.16145 |
| 2 | 84666901  | 1393330_at   | ---       | Transcribed locus                                       | 1.26  | 1.47E-02 | -1.07 | 8.08E-01 | -1.04 | 9.89E-01 | 1.04  | 8.64E-01 | AI137898  | ---      |
| 2 | 85097492  | 1391556_at   | ---       | Transcribed locus                                       | 1.32  | 9.74E-04 | -1.00 | 9.94E-01 | 1.03  | 9.74E-01 | -1.22 | 3.06E-01 | AW524218  | Rn.43151 |
| 2 | 85102158  | 1390437_at   | ---       | Transcribed locus                                       | 1.24  | 2.33E-02 | -1.12 | 5.24E-01 | 1.16  | 8.45E-01 | -1.30 | 3.06E-01 | BE116385  | Rn.14619 |
| 3 | 108987885 | 1385189_at   | Duoxa1    | dual oxidase maturation factor 1                        | 1.08  | 5.49E-01 | 2.00  | 8.77E-04 | -1.02 | 9.90E-01 | 1.05  | 9.10E-01 | BG372602  | Rn.66938 |
| 3 | 120206688 | 1375911_at   | RGD735140 | hypothetical protein LK44                               | -1.02 | 9.35E-01 | 1.30  | 4.83E-02 | 1.22  | 8.84E-01 | 1.12  | 8.64E-01 | AI171772  | Rn.6449  |
| 3 | 134408813 | 1372365_at   | ---       | Transcribed locus                                       | 1.12  | 3.66E-01 | -1.31 | 3.83E-02 | -1.22 | 9.41E-01 | -1.32 | 3.12E-01 | BM392293  | Rn.34193 |

|   |           |              |            |                                                                                                                         |       |          |       |          |       |          |       |          |           |          |
|---|-----------|--------------|------------|-------------------------------------------------------------------------------------------------------------------------|-------|----------|-------|----------|-------|----------|-------|----------|-----------|----------|
| 3 | 137065404 | 1368901_at   | Thbd       | thrombomodulin                                                                                                          | -1.36 | 1.08E-03 | -1.11 | 7.00E-01 | -1.22 | 8.81E-01 | -1.16 | 5.55E-01 | BG666306  | Rn.15127 |
| 3 | 141164582 | 1372162_at   | Acas2l     | acetyl-Coenzyme A synthetase 2 (AMP forming)-like                                                                       | -1.22 | 2.86E-03 | -1.02 | 9.35E-01 | 1.41  | 9.41E-01 | -1.02 | 9.71E-01 | AI176565  | Rn.3528  |
| 3 | 144966613 | 1383117_at   | Pxmp4      | peroxisomal membrane protein 4                                                                                          | 1.02  | 9.24E-01 | 1.57  | 2.77E-02 | 1.21  | 8.87E-01 | 1.17  | 4.09E-01 | AI232414  | Rn.7752  |
| 3 | 144967165 | 1393421_at   | Pxmp4      | peroxisomal membrane protein 4                                                                                          | 1.02  | 9.10E-01 | 1.64  | 9.16E-03 | 1.13  | 9.55E-01 | 1.14  | 4.87E-01 | BG664011  | Rn.7752  |
| 3 | 156765428 | 1375417_at   | ---        | Transcribed locus                                                                                                       | -1.06 | 5.08E-01 | -1.40 | 1.92E-02 | -1.07 | 9.22E-01 | 1.00  | 9.98E-01 | BM391419  | Rn.2952  |
| 3 | 3387045   | 1371390_at   | Tubb2c     | tubulin, beta2c                                                                                                         | 1.05  | 6.36E-01 | -1.39 | 4.64E-02 | -1.12 | 9.62E-01 | 1.06  | 7.69E-01 | AA892044  | Rn.3823  |
| 3 | 42334922  | 1375870_a_at | Rbms1      | RNA binding motif, single stranded interacting protein 1                                                                | -1.07 | 7.26E-01 | -1.34 | 3.20E-02 | -1.13 | 9.56E-01 | -1.04 | 9.13E-01 | BF420140  | Rn.12152 |
| 3 | 59588738  | 1379814_at   | ---        | CDNA clone IMAGE:7302159<br>solute carrier family 1 (glial high affinity glutamate transporter), member 2               | -1.20 | 2.37E-01 | -1.74 | 1.32E-03 | -1.03 | 9.89E-01 | -1.22 | 4.17E-01 | AW532796  | Rn.14694 |
| 3 | 87766997  | 1369693_a_at | Slc1a2     | solute carrier family 1 (glial high affinity glutamate transporter), member 2                                           | -1.01 | 9.66E-01 | -1.96 | 2.01E-02 | -1.11 | 9.17E-01 | -1.04 | 8.99E-01 | NM_017215 | Rn.10240 |
| 3 | 92267350  | 1392077_at   | C11orf8    | Chromosome 11 open reading frame 8                                                                                      | -1.21 | 1.49E-02 | 1.01  | 9.66E-01 | 1.33  | 9.09E-01 | -1.00 | 9.94E-01 | AW536022  | Rn.48596 |
| 4 | 116573982 | 1376792_at   | ---        | Transcribed locus strongly similar to BC014699                                                                          | 1.01  | 9.72E-01 | -1.40 | 1.32E-03 | -1.01 | 9.92E-01 | -1.07 | 6.64E-01 | AW251313  | Rn.828   |
| 4 | 117760903 | 1378365_at   | ---        | Transcribed locus                                                                                                       | -1.49 | 8.35E-04 | -1.01 | 9.85E-01 | 1.02  | 9.81E-01 | -1.08 | 5.91E-01 | AW529483  | Rn.41289 |
| 4 | 118979266 | 1384392_at   | Cyp26b1    | cytochrome P450, family 26, subfamily b, polypeptide 1                                                                  | -2.03 | 1.48E-03 | -2.10 | 6.07E-02 | -1.52 | 7.39E-01 | -1.35 | 4.12E-01 | BF397093  | Rn.9325  |
| 4 | 123167718 | 1375247_at   | ---        | Transcribed locus                                                                                                       | -1.07 | 6.39E-01 | 1.26  | 4.34E-02 | 1.05  | 9.85E-01 | -1.08 | 8.25E-01 | BG372713  | ---      |
| 4 | 144384326 | 1369415_at   | Bhlhb2     | Basic helix-loop-helix domain containing, class B2                                                                      | 1.47  | 5.00E-02 | 1.68  | 1.69E-01 | 1.11  | 9.79E-01 | 1.46  | 5.13E-01 | NM_053328 | Rn.81055 |
| 4 | 144389968 | 1379483_at   | Bhlhb2     | Basic helix-loop-helix domain containing, class B2                                                                      | 1.26  | 3.74E-01 | 1.93  | 3.27E-02 | 1.13  | 9.63E-01 | 1.37  | 3.64E-01 | AI548256  | ---      |
| 4 | 153760608 | 1388583_at   | ---        | Transcribed locus                                                                                                       | 1.17  | 2.23E-02 | -1.08 | 6.74E-01 | -1.06 | 9.74E-01 | -1.51 | 2.16E-01 | BF283398  | ---      |
| 4 | 156719621 | 1368135_at   | Ninj2      | ninjurin 2                                                                                                              | -1.01 | 9.81E-01 | 1.48  | 2.77E-02 | -1.07 | 9.64E-01 | 1.05  | 8.28E-01 | NM_021595 | Rn.35505 |
| 4 | 157540210 | 1377759_at   | Bid        | BH3 interacting domain death agonist                                                                                    | 1.17  | 1.54E-01 | -1.36 | 4.64E-02 | -1.00 | 1.00E+00 | 1.02  | 9.59E-01 | BG666928  | Rn.31142 |
| 4 | 167055577 | 1371680_at   | ---        | Transcribed locus                                                                                                       | -1.17 | 2.93E-02 | -1.32 | 7.64E-02 | -1.19 | 8.54E-01 | -1.33 | 1.94E-01 | BI303631  | Rn.36100 |
| 4 | 173816456 | 1395687_at   | Atf7ip     | activating transcription factor 7 interacting protein                                                                   | 1.09  | 7.27E-01 | -1.26 | 3.20E-02 | 1.35  | 7.88E-01 | 1.17  | 5.05E-01 | BE113420  | Rn.50750 |
| 4 | 178087788 | 1371996_at   | ---        | Transcribed locus                                                                                                       | -1.04 | 6.70E-01 | -1.29 | 3.27E-02 | -1.04 | 9.70E-01 | -1.01 | 9.66E-01 | AI232384  | Rn.1477  |
| 4 | 178089913 | 1385728_at   | Aebp2      | AE binding protein 2                                                                                                    | -1.08 | 8.18E-01 | -1.48 | 2.59E-02 | -1.08 | 9.54E-01 | -1.14 | 5.70E-01 | BE108006  | Rn.51376 |
| 4 | 179798409 | 1387974_a_at | Slc21a4    | kidney specific organic anion transporter                                                                               | 1.29  | 7.72E-03 | 1.01  | 9.66E-01 | -1.04 | 9.65E-01 | 1.05  | 8.34E-01 | AF445995  | Rn.10583 |
| 4 | 18639988  | 1385098_at   | ---        | Transcribed locus                                                                                                       | -1.03 | 9.02E-01 | -1.51 | 8.81E-03 | 1.05  | 9.87E-01 | 1.25  | 5.60E-01 | AW526343  | Rn.46170 |
| 4 | 1951630   | 1368511_at   | Bhlhb3     | basic helix-loop-helix domain containing, class B3                                                                      | 2.00  | 3.98E-03 | 1.30  | 1.87E-01 | 1.39  | 4.79E-01 | 1.22  | 4.64E-01 | NM_133303 | Rn.10784 |
| 4 | 30231615  | 1389718_at   | ---        | Transcribed locus                                                                                                       | -1.01 | 9.36E-01 | 1.02  | 9.59E-01 | 1.58  | 2.55E-02 | 1.23  | 6.91E-01 | AA956417  | Rn.23170 |
| 4 | 30277254  | 1378074_at   | ---        | Transcribed locus                                                                                                       | -1.73 | 2.89E-02 | -1.58 | 3.69E-01 | -1.12 | 8.26E-01 | -1.26 | 6.49E-01 | AI175045  | Rn.11766 |
| 4 | 30278907  | 1369150_at   | Pdk4       | pyruvate dehydrogenase kinase, isoenzyme 4<br>Transcribed locus strongly similar to glucocorticoid induced transcript 1 | -1.35 | 4.72E-02 | -1.59 | 3.51E-01 | -1.18 | 9.33E-01 | -1.10 | 9.15E-01 | NM_053551 | Rn.30070 |
| 4 | 33777889  | 1389679_at   | ---        | Transcribed locus                                                                                                       | -1.30 | 1.44E-03 | -1.20 | 5.08E-01 | -1.10 | 9.55E-01 | -1.37 | 3.49E-01 | AI178923  | Rn.25041 |
| 4 | 63005373  | 1392510_at   | RGD1308013 | similar to hypothetical protein B230314O19                                                                              | 1.00  | 9.87E-01 | 1.31  | 3.84E-02 | -1.08 | 9.60E-01 | 1.25  | 4.96E-01 | BF283618  | Rn.23539 |
| 4 | 66540360  | 1385739_at   | ---        | Transcribed locus                                                                                                       | -1.04 | 7.89E-01 | -1.32 | 3.27E-02 | -1.15 | 8.80E-01 | 1.03  | 9.16E-01 | BE120816  | Rn.53919 |
| 4 | 66544163  | 1383332_at   | ---        | Homeodomain interacting protein kinase 2                                                                                | -1.11 | 4.76E-01 | -1.32 | 3.83E-02 | -1.13 | 9.60E-01 | 1.36  | 5.45E-01 | BI281615  | Rn.50802 |
| 4 | 77489449  | 1377824_a_at | RGD1306512 | similar to igf2 mRNA-binding protein 3                                                                                  | -1.01 | 9.27E-01 | 1.68  | 2.10E-03 | -1.01 | 9.92E-01 | -1.06 | 7.08E-01 | AI230709  | Rn.31564 |
| 4 | 77489449  | 1390860_at   | RGD1306512 | similar to igf2 mRNA-binding protein 3                                                                                  | -1.08 | 5.54E-01 | 1.60  | 2.58E-02 | 1.05  | 9.63E-01 | 1.02  | 9.54E-01 | AI230709  | Rn.31564 |
| 4 | 84015299  | 1373975_at   | ---        | Thioether S-methyltransferase                                                                                           | -1.25 | 3.41E-02 | -1.22 | 6.14E-01 | -1.19 | 9.55E-01 | -1.22 | 6.45E-01 | AI232716  | Rn.19133 |
| 4 | 75834713  | 1382206_a_at | Akap2      | A kinase (PRKA) anchor protein 2                                                                                        | 1.27  | 1.55E-02 | 1.04  | 8.84E-01 | -1.07 | 9.70E-01 | 1.13  | 4.90E-01 | BF398063  | Rn.35524 |
| 4 | 75860093  | 1385566_at   | Akap2      | A kinase (PRKA) anchor protein 2                                                                                        | 1.20  | 4.67E-02 | 1.00  | 9.89E-01 | -1.03 | 9.89E-01 | -1.03 | 9.22E-01 | AI072144  | Rn.21728 |
| 5 | 116749562 | 1370706_a_at | Cyp2j9     | cytochrome P450, family 2, subfamily j, polypeptide 9                                                                   | 1.18  | 4.48E-02 | 1.03  | 9.46E-01 | -1.06 | 9.54E-01 | 1.16  | 6.65E-01 | U39943    | Rn.37480 |
| 5 | 125711811 | 1384225_at   | ---        | Transcribed locus                                                                                                       | -1.05 | 8.88E-01 | 2.50  | 2.62E-04 | -1.24 | 9.44E-01 | -1.00 | 9.95E-01 | BI289963  | Rn.54031 |
| 5 | 127669581 | 1372012_at   | ---        | Transcribed locus                                                                                                       | -1.02 | 9.75E-01 | 1.67  | 3.61E-02 | 1.22  | 5.43E-01 | 1.10  | 7.61E-01 | BF417479  | Rn.9470  |



|   |           |              |            |                                                                            |       |          |       |          |       |          |       |          |           |          |
|---|-----------|--------------|------------|----------------------------------------------------------------------------|-------|----------|-------|----------|-------|----------|-------|----------|-----------|----------|
| 5 | 136316202 | 1368717_at   | Faah       | fatty acid amide hydrolase                                                 | -1.07 | 6.39E-01 | 1.24  | 3.86E-02 | -1.05 | 9.74E-01 | 1.01  | 9.74E-01 | NM_024132 | Rn.10619 |
| 5 | 137121609 | 1393228_at   | RGD1310014 | similar to RIKEN cDNA A830048M07                                           | 1.37  | 3.87E-02 | 1.13  | 4.31E-01 | 1.06  | 9.79E-01 | -1.04 | 8.74E-01 | AA957707  | Rn.9366  |
| 5 | 138002009 | 1388475_at   | ---        | Transcribed locus                                                          | 1.04  | 7.58E-01 | 1.24  | 4.48E-02 | 1.08  | 9.04E-01 | 1.08  | 5.89E-01 | AA899150  | ---      |
| 5 | 153275132 | 1380433_at   | ---        | Transcribed locus moderately similar to LOC360381                          | -1.00 | 9.94E-01 | 1.55  | 9.29E-03 | 1.18  | 8.48E-01 | 1.12  | 7.28E-01 | AI229240  | Rn.22923 |
| 5 | 167250629 | 1368460_at   | Slc2a5     | solute carrier family 2, member 5                                          | 1.05  | 6.06E-01 | 1.65  | 2.15E-03 | 1.02  | 9.87E-01 | 1.11  | 6.77E-01 | NM_031741 | Rn.10900 |
| 5 | 168195933 | 1378745_at   | ---        | Transcribed locus                                                          | 1.39  | 2.44E-02 | 1.52  | 2.98E-01 | 1.23  | 7.31E-01 | 1.20  | 4.53E-01 | BG374483  | Rn.73043 |
| 5 | 23458632  | 1393345_at   | ---        | Transcribed locus                                                          | 1.21  | 1.22E-02 | 1.14  | 5.52E-01 | -1.02 | 9.91E-01 | 1.05  | 8.09E-01 | BF561145  | Rn.64084 |
| 5 | 49544500  | 1370381_at   | Pnrc1      | proline rich 2                                                             | -1.36 | 4.38E-02 | -1.26 | 2.38E-01 | -1.09 | 9.54E-01 | -1.16 | 5.63E-01 | U61729    | Rn.10967 |
| 5 | 58938315  | 1372237_at   | ---        | Transcribed locus                                                          | -1.04 | 6.67E-01 | -1.29 | 2.60E-02 | -1.04 | 9.60E-01 | -1.08 | 6.89E-01 | BI298306  | Rn.39045 |
| 5 | 66029808  | 1397732_at   | ---        | Transcribed locus                                                          | 1.03  | 8.64E-01 | 1.49  | 3.76E-02 | 1.01  | 9.94E-01 | 1.01  | 9.75E-01 | BF408724  | Rn.62173 |
| 5 | 66120335  | 1386656_at   | ---        | Transcribed locus strongly similar to protein KIAA0141                     | 1.03  | 8.30E-01 | 2.43  | 9.13E-03 | -1.01 | 9.89E-01 | -1.02 | 9.04E-01 | BF558870  | Rn.24326 |
| 5 | 66120989  | 1378786_at   | ---        | Transcribed locus strongly similar to protein KIAA0141                     | 1.02  | 9.34E-01 | 2.07  | 2.81E-02 | 1.01  | 9.94E-01 | -1.09 | 7.25E-01 | AI228437  | Rn.24326 |
| 5 | 66250741  | 1387508_at   | Baat       | bile acid-Coenzyme A: amino acid N-acyltransferase                         | -1.91 | 1.36E-02 | -1.10 | 5.37E-01 | 1.02  | 9.89E-01 | 1.01  | 9.62E-01 | NM_017300 | Rn.11129 |
| 5 | 87772852  | 1390456_at   | ---        | Transcribed locus                                                          | -1.04 | 8.49E-01 | -1.26 | 2.77E-02 | 1.05  | 9.66E-01 | 1.06  | 7.93E-01 | AW524471  | Rn.46564 |
| 6 | 1142802   | 1398622_at   | ---        | Cysteine-rich motor neuron 1                                               | -1.10 | 3.50E-01 | -1.44 | 2.15E-02 | 1.17  | 6.48E-01 | -1.02 | 9.60E-01 | AI703807  | Rn.24755 |
| 6 | 1874020   | 1377867_at   | LOC313837  | Glutaminy-peptide cyclotransferase                                         | -1.35 | 1.01E-02 | 1.05  | 8.41E-01 | -1.17 | 9.70E-01 | 1.04  | 9.34E-01 | BM390001  | Rn.7474  |
| 6 | 2465140   | 1395983_at   | ---        | Transcribed locus                                                          | 1.04  | 9.16E-01 | -1.75 | 1.63E-03 | 1.00  | 9.98E-01 | -1.02 | 9.47E-01 | BF407722  | Rn.55953 |
| 6 | 22664926  | 1388447_at   | ---        | Transcribed locus strongly similar to NP_084275                            | -1.25 | 4.84E-02 | -1.01 | 9.76E-01 | -1.07 | 9.67E-01 | -1.17 | 5.08E-01 | AA800701  | Rn.37644 |
| 6 | 43956734  | 1398597_at   | ---        | Transcribed locus                                                          | -1.31 | 3.18E-02 | -1.05 | 8.59E-01 | -1.37 | 5.43E-01 | -1.20 | 4.64E-01 | AI044699  | Rn.30788 |
| 6 | 71899173  | 1383615_a_at | Hectd1     | HECT domain containing 1                                                   | -1.01 | 9.82E-01 | -1.37 | 3.50E-02 | 1.10  | 9.67E-01 | 1.42  | 4.53E-01 | AI059295  | Rn.16492 |
| 6 | 104739289 | 1368609_at   | Slc10a1    | solute carrier family 10 (sodium/bile acid cotransporter family), member 1 | -1.49 | 9.47E-03 | 1.06  | 6.58E-01 | -1.00 | 1.00E+00 | -1.01 | 9.45E-01 | NM_017047 | Rn.9913  |
| 6 | 136702106 | 1373833_at   | ---        | Transcribed locus                                                          | 2.61  | 1.15E-07 | 1.98  | 9.10E-06 | 2.41  | 3.13E-06 | 2.58  | 2.02E-04 | BI288945  | Rn.16913 |
| 6 | 138293318 | 1388272_at   | Igh-1a     | immunoglobulin heavy chain 1a (serum IgG2a)                                | -1.56 | 7.60E-01 | -1.31 | 4.42E-02 | -1.03 | 9.91E-01 | -1.08 | 9.70E-01 | AI411947  | Rn.968   |
| 7 | 113428605 | 1379783_at   | ---        | Transcribed locus                                                          | 1.53  | 5.00E-02 | -1.03 | 9.24E-01 | -1.04 | 9.74E-01 | -1.08 | 7.10E-01 | AI113136  | ---      |
| 7 | 114780280 | 1387052_at   | Gpt1       | glutamic pyruvic transaminase 1, soluble                                   | -1.37 | 4.11E-02 | -1.04 | 9.24E-01 | 1.17  | 9.13E-01 | 1.25  | 4.00E-01 | NM_031039 | Rn.6318  |
| 7 | 120199287 | 1369919_at   | Tef        | thyrotroph embryonic factor                                                | 1.63  | 1.18E-02 | 1.17  | 6.70E-01 | 1.31  | 5.43E-01 | 1.49  | 3.19E-01 | NM_019194 | Rn.81206 |
| 7 | 120213376 | 1390819_at   | ---        | Transcribed locus                                                          | 1.42  | 3.72E-02 | 1.26  | 3.53E-01 | 1.15  | 7.94E-01 | 1.05  | 9.01E-01 | BF419374  | Rn.59871 |
| 7 | 122816095 | 1378800_at   | ---        | Transcribed locus                                                          | -1.06 | 7.25E-01 | -1.61 | 2.35E-03 | 1.03  | 9.79E-01 | -1.03 | 8.92E-01 | BI291526  | Rn.61644 |
| 7 | 122828237 | 1376501_at   | Arhgap8    | Rho GTPase activating protein 8                                            | -1.08 | 5.02E-01 | -1.74 | 2.47E-02 | 1.01  | 9.93E-01 | -1.08 | 8.27E-01 | AA945062  | Rn.7830  |
| 7 | 127299720 | 1376702_at   | ---        | Megalencephalic leukoencephalopathy with subcortical cysts 1               | -1.63 | 9.65E-03 | 1.38  | 2.49E-01 | -1.01 | 9.90E-01 | 1.01  | 9.80E-01 | AI228307  | Rn.12794 |
| 7 | 138541852 | 1371363_at   | Gpd1       | glycerol-3-phosphate dehydrogenase 1 (soluble)                             | 1.06  | 6.06E-01 | 1.34  | 2.76E-02 | 1.64  | 8.20E-01 | 1.20  | 5.36E-01 | BI277042  | ---      |
| 7 | 139762616 | 1369064_a_at | Scn8a      | sodium channel, voltage-gated, type 8, alpha polypeptide                   | 1.23  | 8.98E-03 | 1.04  | 8.67E-01 | 1.05  | 9.74E-01 | 1.02  | 9.26E-01 | NM_019266 | Rn.10073 |
| 7 | 1710433   | 1383695_at   | Vipr1      | vasoactive intestinal peptide receptor 1                                   | -1.00 | 9.92E-01 | -1.24 | 3.20E-02 | 1.00  | 1.00E+00 | 1.07  | 8.63E-01 | BI301509  | Rn.11756 |
| 7 | 24553367  | 1370333_a_at | Igf1       | insulin-like growth factor 1                                               | 1.33  | 2.63E-02 | 1.23  | 5.44E-02 | -1.05 | 9.91E-01 | 1.06  | 9.04E-01 | M15481    | Rn.6282  |
| 7 | 24630588  | 1388469_at   | Igf1       | Insulin-like growth factor I                                               | 1.27  | 4.80E-02 | 1.34  | 6.18E-02 | -1.06 | 9.91E-01 | 1.06  | 9.12E-01 | AA945615  | Rn.4303  |
| 7 | 35313826  | 1388502_at   | ---        | Inositol polyphosphate-5-phosphatase B                                     | 1.62  | 2.99E-02 | 1.25  | 4.69E-01 | 1.15  | 8.20E-01 | 1.34  | 3.05E-01 | AI412624  | Rn.2252  |
| 7 | 47261064  | 1373896_at   | ---        | Transcribed locus                                                          | -1.40 | 3.18E-02 | 1.03  | 9.33E-01 | -1.10 | 9.60E-01 | 1.05  | 8.59E-01 | AA943569  | Rn.7596  |
| 7 | 67495874  | 1373814_at   | R3hdm2     | R3H domain containing 2                                                    | -1.11 | 3.47E-01 | 1.11  | 6.95E-01 | 1.06  | 9.79E-01 | -1.55 | 2.28E-02 | BI291270  | Rn.22359 |
| 7 | 67663517  | 1391527_at   | Nab2       | Ngfi-A binding protein 2                                                   | -1.13 | 5.46E-01 | -1.16 | 6.09E-01 | -1.20 | 8.81E-01 | -1.40 | 1.64E-02 | BE109296  | Rn.53955 |
| 7 | 91777036  | 1393615_at   | ---        | Transcribed locus                                                          | -1.07 | 7.22E-01 | -1.33 | 3.20E-02 | 1.18  | 5.04E-01 | 1.18  | 8.12E-01 | AI059603  | Rn.19226 |
| 8 | ---       | 1368520_at   | Apoa4      | apolipoprotein A-IV                                                        | -1.00 | 9.82E-01 | 1.77  | 3.18E-04 | 1.01  | 9.90E-01 | -1.04 | 8.45E-01 | NM_012737 | Rn.15739 |

|    |           |              |            |                                                                                       |       |          |       |          |       |          |       |          |           |          |
|----|-----------|--------------|------------|---------------------------------------------------------------------------------------|-------|----------|-------|----------|-------|----------|-------|----------|-----------|----------|
| 8  | 100345077 | 1378131_at   | Slc9a4     | Solute carrier family 9 (sodium/hydrogen exchanger), isoform 9                        | 1.28  | 6.20E-03 | -1.04 | 8.59E-01 | -1.21 | 9.67E-01 | 1.12  | 5.02E-01 | AI045015  | Rn.16082 |
| 8  | 100671280 | 1382569_at   | Paqr9      | Progesterone and adipoQ receptor family member IX                                     | 1.15  | 3.98E-01 | 1.47  | 4.17E-02 | 1.05  | 9.79E-01 | -1.02 | 8.82E-01 | BF386242  | Rn.64169 |
| 8  | 111535452 | 1377992_at   | ---        | Transcribed locus                                                                     | 1.26  | 4.61E-02 | -1.17 | 4.34E-01 | 1.00  | 1.00E+00 | 1.09  | 8.13E-01 | AI111775  | Rn.26636 |
| 8  | 112129534 | 1372352_at   | Armet      | arginine-rich, mutated in early stage tumors                                          | -1.01 | 9.46E-01 | 1.35  | 2.81E-02 | -1.04 | 9.90E-01 | 1.04  | 8.89E-01 | AI170666  | Rn.12213 |
| 8  | 2038610   | 1387818_at   | Casp11     | caspase 11                                                                            | 1.17  | 3.51E-02 | 1.19  | 2.26E-01 | -1.11 | 9.36E-01 | 1.20  | 2.73E-01 | NM_053736 | Rn.16195 |
| 8  | 47060850  | 1387703_a_at | Usp2       | Ubiquitin specific protease 2                                                         | 1.61  | 2.37E-02 | 2.31  | 2.36E-01 | 1.14  | 9.70E-01 | 1.54  | 6.31E-01 | AF106659  | Rn.19491 |
| 8  | 47086381  | 1381811_at   | Usp2       | Ubiquitin specific protease 2                                                         | 1.61  | 4.74E-02 | 2.31  | 2.95E-01 | 1.15  | 9.67E-01 | 1.65  | 5.08E-01 | BM385405  | Rn.12335 |
| 8  | 55468550  | 1375542_at   | Rdx        | Radixin                                                                               | -1.03 | 9.02E-01 | -1.44 | 1.09E-02 | 1.04  | 9.79E-01 | 1.03  | 9.00E-01 | AI407092  | Rn.7684  |
| 8  | 56857559  | 1377934_at   | ---        | Transcribed locus<br>acidic (leucine-rich) nuclear phosphoprotein 32 family, member A | -1.24 | 3.66E-02 | -1.69 | 5.23E-03 | 1.01  | 9.97E-01 | -1.06 | 7.59E-01 | BF387289  | Rn.17683 |
| 8  | 66507241  | 1369063_at   | Anp32a     | Transcribed locus                                                                     | 1.39  | 2.49E-02 | 1.07  | 9.07E-01 | 1.10  | 9.73E-01 | 1.31  | 2.72E-01 | NM_012903 | Rn.10123 |
| 8  | 70222125  | 1372616_at   | ---        | Transcribed locus                                                                     | 1.03  | 9.21E-01 | 3.63  | 8.55E-03 | 1.07  | 9.70E-01 | 1.12  | 5.08E-01 | AI144796  | ---      |
| 8  | 79653387  | 1393971_at   | ---        | Transcribed locus                                                                     | 1.05  | 7.83E-01 | 1.68  | 2.46E-02 | 1.04  | 9.74E-01 | -1.01 | 9.77E-01 | AW535616  | Rn.48527 |
| 8  | 80231779  | 1368273_at   | Mapk6      | mitogen-activated protein kinase 6                                                    | 1.08  | 3.58E-01 | 1.30  | 2.76E-02 | -1.02 | 9.88E-01 | 1.15  | 4.66E-01 | NM_031622 | Rn.2566  |
| 8  | 84660813  | 1370927_at   | Col12a1    | procollagen, type XII, alpha 1                                                        | -1.03 | 7.77E-01 | 1.41  | 2.77E-02 | -1.28 | 9.70E-01 | 1.12  | 8.25E-01 | BE108345  | Rn.11218 |
| 9  | 12620444  | 1389066_at   | Dscr111    | Down syndrome critical region gene 1-like 1                                           | -1.02 | 8.85E-01 | -2.11 | 2.54E-03 | 1.10  | 9.70E-01 | 1.08  | 8.64E-01 | BI274408  | Rn.24428 |
| 9  | 12622578  | 1374235_at   | Dscr111    | Down syndrome critical region gene 1-like 1                                           | 1.05  | 6.51E-01 | -2.27 | 2.70E-03 | 1.06  | 9.67E-01 | 1.22  | 5.43E-01 | AI138048  | Rn.23797 |
| 9  | 3307609   | 1382627_at   | ---        | Special AT-rich sequence binding protein 1                                            | 1.02  | 9.45E-01 | 1.00  | 9.90E-01 | 1.12  | 9.74E-01 | 1.65  | 4.69E-02 | AA956525  | ---      |
| 9  | 42932597  | 1372646_at   | RGD1305645 | similar to RIKEN cDNA 1500015O10                                                      | 1.23  | 5.40E-03 | 1.01  | 9.85E-01 | -1.14 | 8.81E-01 | 1.33  | 1.28E-01 | BF418649  | Rn.16593 |
| 9  | 61589021  | 1382995_at   | Nrp2       | Neuropilin 2                                                                          | -1.15 | 3.48E-01 | -1.49 | 4.02E-02 | -1.20 | 9.37E-01 | -1.26 | 3.05E-01 | AA859669  | Rn.57331 |
| 9  | 61591097  | 1378171_at   | Nrp2       | Neuropilin 2                                                                          | -1.11 | 5.72E-01 | -1.57 | 8.12E-04 | -1.16 | 9.44E-01 | -1.09 | 6.92E-01 | BF409060  | Rn.49567 |
| 9  | 74642893  | 1371542_at   | Tuba4a     | Alpha-tubulin 4                                                                       | 1.02  | 9.26E-01 | -1.56 | 1.49E-02 | 1.02  | 9.92E-01 | 1.94  | 4.62E-01 | BI284599  | Rn.6673  |
| 9  | 74698785  | 1367904_at   | Resp18     | regulated endocrine-specific protein 18                                               | 1.10  | 6.91E-01 | -1.55 | 2.57E-02 | 1.02  | 9.88E-01 | 1.22  | 5.53E-01 | NM_019278 | Rn.2225  |
| 10 | 13125542  | 1393241_at   | ---        | Transcribed locus                                                                     | -1.02 | 9.46E-01 | 2.22  | 3.20E-02 | 1.01  | 9.95E-01 | -1.05 | 8.89E-01 | BI295197  | ---      |
| 10 | 14128644  | 1387816_at   | ---        | Transcribed locus                                                                     | 1.13  | 4.17E-01 | 1.41  | 1.45E-02 | 1.03  | 9.75E-01 | -1.01 | 9.76E-01 | NM_053329 | Rn.7327  |
| 10 | 20939793  | 1368993_at   | Odz2       | odd Oz/ten-m homolog 2 (Drosophila)                                                   | 1.03  | 9.27E-01 | -1.41 | 4.35E-02 | 1.02  | 9.91E-01 | -1.05 | 8.58E-01 | NM_020088 | Rn.53894 |
| 10 | 21391324  | 1375331_at   | ---        | Transcribed locus                                                                     | 1.08  | 3.83E-01 | -1.67 | 1.45E-02 | 1.04  | 9.74E-01 | 1.00  | 9.92E-01 | BF418058  | Rn.63527 |
| 10 | 46305027  | 1387908_at   | Rasd1      | RAS, dexamethasone-induced 1                                                          | -1.01 | 9.81E-01 | -1.00 | 9.94E-01 | 1.09  | 9.74E-01 | 2.04  | 3.23E-02 | AF239157  | Rn.7500  |
| 10 | 56913694  | 1370149_at   | Asgr1      | asialoglycoprotein receptor 1                                                         | 1.46  | 9.06E-03 | 1.01  | 9.53E-01 | 1.05  | 9.55E-01 | -1.11 | 7.22E-01 | NM_012503 | Rn.44300 |
| 10 | 57077030  | 1386833_at   | Bcl6b      | B-cell CLL/lymphoma 6, member B                                                       | -1.07 | 6.99E-01 | 1.01  | 9.82E-01 | -1.07 | 9.77E-01 | -1.51 | 2.85E-03 | BF554138  | Rn.20865 |
| 10 | 57545284  | 1367605_at   | Pfn1       | profilin 1                                                                            | 1.09  | 2.63E-01 | 1.28  | 2.60E-02 | 1.00  | 1.00E+00 | 1.02  | 9.32E-01 | NM_022511 | Rn.1152  |
| 10 | 59290195  | 1385171_s_at | ---        | Transcribed locus                                                                     | -1.21 | 4.98E-02 | 1.07  | 7.46E-01 | 1.01  | 9.97E-01 | 2.58  | 4.78E-01 | BE115612  | ---      |
| 10 | 72347376  | 1382754_at   | ---        | Transcribed locus                                                                     | 1.08  | 5.86E-01 | 1.50  | 2.14E-02 | 1.02  | 9.88E-01 | -1.07 | 7.69E-01 | H33080    | Rn.14621 |
| 10 | 75221353  | 1390117_at   | ---        | Transcribed locus                                                                     | -1.49 | 6.37E-02 | -1.39 | 2.15E-02 | -1.22 | 9.46E-01 | -1.10 | 5.91E-01 | BG372455  | Rn.16601 |
| 10 | 78760103  | 1374709_at   | ---        | Transcribed locus                                                                     | 1.32  | 4.46E-02 | 1.06  | 9.01E-01 | 1.20  | 8.20E-01 | 1.04  | 8.75E-01 | AI406795  | Rn.19878 |
| 10 | 78762133  | 1385585_at   | ---        | Transcribed locus                                                                     | 1.39  | 3.08E-02 | 1.18  | 5.64E-01 | 1.18  | 9.05E-01 | 1.04  | 8.17E-01 | AI111674  | ---      |
| 10 | 83208696  | 1392952_at   | ---        | Transcribed locus                                                                     | -1.26 | 5.92E-03 | 1.27  | 4.71E-01 | 1.03  | 9.88E-01 | -1.17 | 5.08E-01 | BI277131  | ---      |
| 10 | 83636918  | 1388116_at   | Col1a1     | collagen, type 1, alpha 1                                                             | 1.15  | 6.87E-01 | 1.36  | 5.23E-03 | -1.19 | 9.80E-01 | -1.04 | 9.76E-01 | BI285575  | Rn.2953  |
| 10 | 87555387  | 1370816_at   | Nr1d1      | nuclear receptor subfamily 1, group D, member 1                                       | 1.36  | 2.54E-03 | 1.28  | 4.63E-01 | 1.24  | 8.02E-01 | 1.16  | 6.86E-01 | M25804    | Rn.29848 |
| 10 | 92844349  | 1374900_at   | Gosr2      | golgi SNAP receptor complex member 2                                                  | 1.23  | 1.64E-02 | 1.12  | 4.68E-01 | 1.11  | 9.30E-01 | -1.09 | 5.89E-01 | BM388807  | Rn.13518 |
| 10 | 92845193  | 1375438_at   | Gosr2      | golgi SNAP receptor complex member 2                                                  | 1.23  | 5.47E-03 | 1.13  | 3.06E-01 | -1.02 | 9.89E-01 | 1.02  | 9.29E-01 | AA964687  | Rn.12617 |
| 10 | 92846566  | 1370031_at   | Gosr2      | golgi SNAP receptor complex member 2                                                  | 1.42  | 2.46E-03 | 1.16  | 4.35E-01 | -1.21 | 8.50E-01 | 1.11  | 6.58E-01 | NM_031685 | Rn.10734 |

|    |           |              |         |                                                               |       |          |       |          |       |          |       |          |           |          |
|----|-----------|--------------|---------|---------------------------------------------------------------|-------|----------|-------|----------|-------|----------|-------|----------|-----------|----------|
| 10 | 96908433  | 1392983_at   | ---     | Transcribed locus                                             | 1.03  | 8.44E-01 | -1.27 | 3.42E-02 | -1.05 | 9.55E-01 | 1.02  | 9.17E-01 | BE103250  | Rn.15873 |
| 11 | 32442818  | 1388686_at   | Dscr1   | Down syndrome critical region homolog 1                       | 1.05  | 8.34E-01 | 1.50  | 2.91E-02 | -1.32 | 8.58E-01 | 1.01  | 9.79E-01 | AI170193  | Rn.12942 |
| 11 | 56393581  | 1381206_at   | ---     | Transcribed locus                                             | 1.18  | 3.50E-01 | -2.08 | 3.06E-02 | -1.01 | 9.94E-01 | 1.09  | 6.60E-01 | BE121026  | Rn.53717 |
| 11 | 64157425  | 1370445_at   | Pla1a   | phospholipase A1 member A                                     | -1.13 | 4.07E-01 | -1.49 | 2.35E-03 | -1.28 | 5.87E-01 | 1.01  | 9.84E-01 | D88666    | Rn.10696 |
| 11 | 66537744  | 1368195_at   | Hspbap1 | Hspb associated protein 1                                     | 1.22  | 2.49E-02 | -1.01 | 9.74E-01 | -1.01 | 9.94E-01 | -1.17 | 3.38E-01 | NM_134419 | Rn.25280 |
| 11 | 69159862  | 1381998_at   | Znf148  | Zinc finger protein 148                                       | 1.02  | 9.32E-01 | -1.28 | 3.64E-02 | -1.03 | 9.88E-01 | -1.00 | 9.98E-01 | AW519820  | Rn.19989 |
| 11 | 80334440  | 1387082_at   | Fetub   | fetuin beta                                                   | 1.60  | 5.25E-04 | 1.06  | 6.73E-01 | 1.04  | 9.79E-01 | -1.03 | 8.81E-01 | NM_053348 | Rn.2464  |
| 11 | 84962339  | 1372920_at   | ---     | Proline dehydrogenase                                         | -1.41 | 3.57E-02 | -1.40 | 2.44E-01 | 1.06  | 9.89E-01 | -1.50 | 1.16E-01 | AI411345  | Rn.41672 |
| 11 | 85084498  | 1367773_at   | Slc25a1 | solute carrier family 25, member 1                            | 1.09  | 3.39E-01 | 1.30  | 3.62E-02 | -1.08 | 9.74E-01 | 1.57  | 4.17E-01 | NM_017307 | Rn.8368  |
| 12 | ---       | 1397788_at   | Rimbp2  | RIM binding protein 2                                         | 1.48  | 6.57E-03 | 1.00  | 9.92E-01 | -1.10 | 9.54E-01 | -1.12 | 6.29E-01 | AW521711  | Rn.45229 |
| 12 | 17482434  | 1387234_at   | Azgp1   | alpha-2-glycoprotein 1, zinc                                  | -1.41 | 2.14E-02 | -1.02 | 9.22E-01 | 1.02  | 9.91E-01 | -1.04 | 8.97E-01 | NM_012826 | Rn.5007  |
| 12 | 22903157  | 1395753_at   | Eln     | elastin                                                       | -1.14 | 2.54E-01 | -1.36 | 4.71E-02 | -1.27 | 8.92E-01 | -1.01 | 9.80E-01 | BI274506  | Rn.79980 |
| 12 | 286526    | 1378006_at   | ---     | Transcribed locus                                             | -1.79 | 1.88E-04 | 1.02  | 9.37E-01 | -1.31 | 1.56E-01 | -1.85 | 2.14E-03 | AI233832  | ---      |
| 12 | 28875205  | 1395991_at   | ---     | Transcribed locus                                             | 1.46  | 3.80E-03 | 1.01  | 9.84E-01 | -1.08 | 9.44E-01 | -1.14 | 4.96E-01 | BE107556  | Rn.50806 |
| 12 | 3695844   | 1391871_at   | ---     | Transcribed locus                                             | -1.19 | 3.04E-02 | -1.35 | 1.62E-01 | -1.23 | 5.24E-01 | -1.12 | 3.55E-01 | AI763550  | ---      |
| 12 | 37144481  | 1369864_a_at | Sds     | serine dehydratase                                            | 1.29  | 2.16E-01 | 1.86  | 6.35E-03 | -1.03 | 9.83E-01 | 1.01  | 9.79E-01 | NM_053962 | Rn.9918  |
| 12 | 40364270  | 1390431_at   | ---     | Transcribed locus                                             | -1.03 | 7.84E-01 | -1.28 | 3.71E-02 | -1.07 | 9.74E-01 | -1.18 | 5.59E-01 | AI111559  | Rn.22062 |
| 12 | 9546914   | 1370593_at   | Cyp3a11 | cytochrome P450, family 3, subfamily a, polypeptide 11        | 1.03  | 8.61E-01 | -1.52 | 3.54E-02 | 1.00  | 1.00E+00 | 1.03  | 9.26E-01 | U09742    | Rn.37424 |
| 13 | 106349250 | 1371904_at   | Smyd2   | SET and MYND domain containing 2                              | 1.09  | 4.54E-01 | 1.29  | 2.62E-02 | -1.04 | 9.89E-01 | 1.31  | 4.70E-01 | BI294698  | Rn.7052  |
| 13 | 33333182  | 1389377_at   | Insig2  | insulin induced gene 2                                        | 1.04  | 7.88E-01 | -1.69 | 4.11E-02 | 1.11  | 9.37E-01 | 1.04  | 8.59E-01 | AA851803  | Rn.8474  |
| 13 | 33334533  | 1393690_at   | Insig2  | insulin induced gene 2                                        | -1.00 | 9.87E-01 | -1.91 | 1.42E-02 | 1.12  | 8.78E-01 | -1.02 | 9.49E-01 | AA818627  | Rn.16736 |
| 13 | 43799887  | 1371099_at   | ---     | Polymeric immunoglobulin receptor AATTAA-containing           | -1.34 | 4.43E-02 | 1.01  | 9.56E-01 | 1.07  | 9.66E-01 | -1.13 | 3.33E-01 | U07886    | Rn.54456 |
| 13 | 45260373  | 1374160_at   | ---     | Transcribed locus                                             | 1.59  | 5.52E-02 | 3.61  | 2.70E-03 | 1.10  | 9.67E-01 | 2.39  | 8.40E-02 | BE111296  | Rn.19339 |
| 13 | 46276780  | 1368190_at   | ---     | Transcribed locus                                             | -1.43 | 3.42E-02 | 1.05  | 8.27E-01 | -1.02 | 9.89E-01 | 1.03  | 9.34E-01 | J02941    | ---      |
| 13 | 48764243  | 1370057_at   | Csrp1   | cysteine and glycine-rich protein 1                           | -1.03 | 7.72E-01 | 1.42  | 3.42E-02 | -1.09 | 9.74E-01 | -1.21 | 4.06E-01 | NM_017148 | Rn.2401  |
| 13 | 53011980  | 1383046_at   | ---     | CDNA clone MGC:108856 IMAGE:7370585                           | -1.58 | 4.46E-02 | -1.05 | 8.57E-01 | -1.02 | 9.88E-01 | 1.04  | 8.02E-01 | AA957258  | ---      |
| 13 | 67474689  | 1379899_at   | ---     | Transcribed locus                                             | -1.36 | 1.56E-03 | 1.02  | 9.46E-01 | 1.06  | 9.80E-01 | -1.02 | 9.65E-01 | BI298010  | ---      |
| 13 | 70072894  | 1389355_at   | ---     | Transcribed locus                                             | -1.18 | 4.46E-02 | -1.20 | 5.72E-01 | -1.22 | 9.74E-01 | -1.13 | 4.97E-01 | BF285187  | Rn.8590  |
| 13 | 78517950  | 1387053_at   | Fmo1    | flavin containing monooxygenase 1                             | 1.00  | 9.95E-01 | -1.70 | 1.32E-03 | 1.03  | 9.89E-01 | -1.05 | 9.02E-01 | NM_012792 | Rn.867   |
| 13 | 80588998  | 1373947_at   | Dpt     | dermatopontin                                                 | 1.05  | 6.84E-01 | 1.56  | 1.40E-02 | -1.21 | 9.67E-01 | 1.07  | 6.62E-01 | BI278545  | Rn.8396  |
| 13 | 85459512  | 1369957_at   | Rgs5    | regulator of G-protein signaling 5                            | 1.03  | 8.62E-01 | -1.58 | 1.06E-02 | 1.07  | 9.79E-01 | 1.56  | 1.07E-01 | NM_019341 | Rn.1150  |
| 13 | 87248359  | 1390912_at   | ---     | CDNA clone IMAGE:7300848                                      | 1.07  | 7.50E-01 | -2.06 | 6.37E-03 | -1.03 | 9.79E-01 | 1.09  | 7.12E-01 | BE101168  | Rn.61111 |
| 13 | 87248897  | 1390227_at   | ---     | CDNA clone IMAGE:7300848                                      | 1.03  | 7.74E-01 | -1.60 | 2.77E-02 | -1.04 | 9.74E-01 | 1.09  | 7.04E-01 | AI101017  | Rn.43361 |
| 13 | 87293124  | 1368797_at   | Nr1i3   | nuclear receptor subfamily 1, group I, member 3               | -1.02 | 9.16E-01 | -1.65 | 1.32E-03 | -1.04 | 9.74E-01 | 1.10  | 5.11E-01 | NM_022941 | Rn.48759 |
| 13 | 87340224  | 1393730_at   | ---     | Transcribed locus                                             | -1.08 | 6.33E-01 | 1.03  | 8.76E-01 | -1.22 | 9.07E-01 | -1.49 | 4.11E-03 | BI277836  | ---      |
| 13 | 88402731  | 1369364_at   | Atp1a4  | ATPase, Na+/K+ transporting, alpha 4 polypeptide              | 1.22  | 3.71E-02 | -1.02 | 9.36E-01 | 1.01  | 9.89E-01 | 1.03  | 8.36E-01 | NM_022848 | Rn.10013 |
| 13 | 57510680  | 1370235_at   | Dbi     | diazepam binding inhibitor                                    | 1.03  | 8.22E-01 | 1.31  | 2.56E-02 | -1.10 | 9.54E-01 | 1.34  | 4.23E-01 | AI175009  | Rn.3285  |
| 14 | 22786923  | 1381852_at   | ---     | Transcribed locus                                             | -1.08 | 6.39E-01 | -1.47 | 2.90E-02 | 1.01  | 9.96E-01 | -1.07 | 6.93E-01 | AI059908  | Rn.19484 |
| 14 | 2487625   | 1384394_at   | ---     | Transcribed locus                                             | -1.05 | 7.51E-01 | -1.33 | 4.49E-02 | 1.06  | 9.74E-01 | 1.25  | 5.08E-01 | BF548081  | ---      |
| 14 | 3241305   | 1373092_at   | ---     | Transcribed locus                                             | -1.19 | 3.13E-02 | -1.13 | 4.71E-01 | -1.05 | 9.74E-01 | -1.31 | 1.18E-01 | BE109587  | Rn.8191  |
| 14 | 34904624  | 1381470_at   | Kit     | V-kit Hardy-Zuckerman 4 feline sarcoma viral oncogene homolog | 1.04  | 6.88E-01 | -1.38 | 3.19E-02 | 1.01  | 9.95E-01 | -1.28 | 3.85E-01 | AI454052  | Rn.16698 |

|    |           |              |            |                                                                |       |          |       |          |       |          |       |          |           |          |
|----|-----------|--------------|------------|----------------------------------------------------------------|-------|----------|-------|----------|-------|----------|-------|----------|-----------|----------|
| 14 | 45525305  | 1373079_at   | ---        | Transcribed locus                                              | -1.04 | 7.04E-01 | 1.41  | 3.64E-02 | -1.10 | 8.96E-01 | -1.05 | 7.68E-01 | BI296427  | Rn.8272  |
| 14 | 62661945  | 1368168_at   | Slc34a2    | solute carrier family 34 (sodium phosphate), member 2          | -1.04 | 9.14E-01 | -2.45 | 2.14E-02 | 1.01  | 9.91E-01 | -1.02 | 9.33E-01 | NM_053380 | Rn.16933 |
| 14 | 80732529  | 1372565_at   | ---        | Transcribed locus                                              | -1.08 | 4.88E-01 | 1.02  | 9.58E-01 | -1.41 | 3.10E-02 | -1.38 | 1.97E-01 | BI274192  | ---      |
| 14 | 99712778  | 1384308_at   | Meis1      | myeloid ecotropic viral integration site 1 homolog             | -1.13 | 1.68E-01 | -1.32 | 5.00E-02 | 1.01  | 9.95E-01 | -1.32 | 2.78E-01 | AW532697  | Rn.32269 |
| 15 | 108030330 | 1371963_at   | Pcca       | propionyl-coenzyme A carboxylase, alpha polypeptide            | -1.02 | 8.66E-01 | -1.28 | 4.83E-02 | 1.04  | 9.88E-01 | 1.14  | 5.33E-01 | BF395042  | Rn.6033  |
| 15 | 108046123 | 1392725_at   | RGD1304748 | similar to cDNA sequence BC006662                              | 1.07  | 4.91E-01 | 1.46  | 3.42E-03 | -1.01 | 9.98E-01 | 1.07  | 7.77E-01 | AA924588  | Rn.32611 |
| 15 | 34557617  | 1368501_s_at | Mcpt8      | mast cell protease 8                                           | -1.01 | 9.73E-01 | 1.27  | 2.99E-02 | -1.11 | 9.04E-01 | -1.23 | 4.96E-01 | NM_019323 | Rn.10651 |
| 15 | 38386963  | 1390433_at   | ---        | Transcribed locus                                              | 1.00  | 9.93E-01 | -1.26 | 3.27E-02 | -1.04 | 9.80E-01 | -1.04 | 8.80E-01 | AI102429  | Rn.19335 |
| 15 | 4615310   | 1375637_at   | ---        | Transcribed locus                                              | 1.03  | 7.75E-01 | 1.32  | 3.84E-02 | -1.11 | 9.62E-01 | -1.03 | 9.04E-01 | AI010441  | ---      |
| 16 | 47618509  | 1385783_at   | ---        | Transcribed locus                                              | 1.04  | 7.33E-01 | -1.36 | 2.69E-02 | -1.02 | 9.94E-01 | 1.06  | 8.39E-01 | BF418697  | ---      |
| 16 | 49248790  | 1379888_at   | ---        | Transcribed locus                                              | -1.01 | 9.43E-01 | 3.01  | 2.77E-02 | -1.06 | 9.70E-01 | 1.02  | 9.45E-01 | AA945268  | Rn.7850  |
| 16 | 67694238  | 1376829_at   | ---        | Transcribed locus                                              | 1.08  | 6.99E-01 | 1.58  | 1.63E-02 | 1.06  | 9.55E-01 | 1.03  | 8.60E-01 | AI716500  | Rn.39005 |
| 16 | 73711582  | 1367800_at   | Plat       | plasminogen activator, tissue                                  | -1.21 | 1.46E-02 | 1.13  | 4.77E-01 | -1.16 | 9.44E-01 | -1.18 | 3.97E-01 | NM_013151 | Rn.1002  |
| 16 | 74980319  | 1369660_at   | ---        | Transcribed locus                                              | -1.25 | 4.84E-03 | -1.05 | 8.01E-01 | 1.07  | 9.54E-01 | -1.03 | 9.44E-01 | AF068860  | Rn.31800 |
| 17 | 22525760  | 1375183_at   | ldb4       | Inhibitor of DNA binding 4                                     | -1.03 | 8.77E-01 | -1.57 | 4.17E-02 | -1.11 | 8.77E-01 | 1.05  | 8.58E-01 | AW916745  | ---      |
| 17 | 37145294  | 1373718_at   | ---        | Transcribed locus                                              | 1.01  | 9.53E-01 | -2.11 | 1.45E-02 | -1.09 | 9.91E-01 | -1.01 | 9.73E-01 | BM384071  | ---      |
| 17 | 64000643  | 1382183_at   | ---        | Transcribed locus                                              | -1.24 | 3.34E-02 | 1.01  | 9.66E-01 | 1.05  | 9.85E-01 | -1.13 | 6.46E-01 | AA849479  | Rn.21436 |
| 17 | 6546464   | 1393875_at   | Slc35d2    | Solute carrier family 35, member D2                            | 1.07  | 7.27E-01 | 1.49  | 3.20E-02 | -1.05 | 9.67E-01 | -1.00 | 9.92E-01 | AI500781  | Rn.34490 |
| 17 | 72131830  | 1372869_at   | ---        | Transcribed locus                                              | -1.04 | 8.03E-01 | 1.30  | 3.64E-02 | -1.06 | 9.44E-01 | -1.21 | 3.06E-01 | BE109202  | ---      |
| 17 | 77158160  | 1391056_at   | ---        | Transcribed locus strongly similar to RAKb                     | -1.01 | 9.68E-01 | 1.94  | 6.46E-03 | -1.01 | 9.90E-01 | 1.04  | 8.54E-01 | AA817695  | ---      |
| 17 | 77553428  | 1372000_at   | ---        | Transcribed locus                                              | -1.10 | 3.75E-01 | -1.50 | 2.76E-02 | -1.10 | 9.55E-01 | -1.16 | 6.15E-01 | AI180187  | Rn.3889  |
| 17 | 78496768  | 1376259_at   | ---        | Transcribed locus                                              | -1.01 | 9.39E-01 | 1.00  | 9.88E-01 | 1.41  | 1.29E-02 | 1.46  | 4.83E-01 | AI171093  | ---      |
| 17 | 87556722  | 1387037_at   | Cubn       | cubilin (intrinsic factor-cobalamin receptor)                  | -1.08 | 5.14E-01 | 1.05  | 8.23E-01 | -1.07 | 9.74E-01 | 1.63  | 3.55E-02 | AF022247  | Rn.3236  |
| 18 | 15579502  | 1391246_at   | ---        | Transcribed locus                                              | -1.04 | 7.90E-01 | -1.02 | 9.43E-01 | -1.34 | 4.98E-02 | 1.20  | 6.02E-01 | BF390318  | Rn.45419 |
| 18 | 24705577  | 1395147_at   | ---        | Transcribed locus                                              | 1.02  | 9.35E-01 | -1.35 | 2.20E-02 | -1.09 | 9.54E-01 | -1.12 | 6.02E-01 | BE116565  | ---      |
| 18 | 25867266  | 1371412_a_at | ---        | Transcribed locus moderately similar to LOC461994              | 1.24  | 5.47E-03 | 1.58  | 1.03E-01 | 1.31  | 8.80E-01 | 1.79  | 1.74E-01 | BE107450  | Rn.8180  |
| 18 | 26842101  | 1371481_at   | ---        | Transcribed locus                                              | 1.08  | 4.35E-01 | 1.35  | 3.50E-02 | 1.00  | 1.00E+00 | 1.06  | 7.08E-01 | BI274372  | Rn.40477 |
| 18 | 37168686  | 1368447_x_at | Spink1     | serine protease inhibitor, Kazal type 1                        | 1.02  | 8.70E-01 | -1.69 | 9.56E-03 | 1.17  | 8.26E-01 | 1.03  | 9.30E-01 | M27882    | Rn.9767  |
| 18 | 37168686  | 1387193_a_at | Spink1     | serine protease inhibitor, Kazal type 1                        | -1.03 | 8.43E-01 | -1.76 | 9.22E-03 | -1.02 | 9.89E-01 | -1.03 | 9.33E-01 | M27882    | Rn.9767  |
| 18 | 75718118  | 1389562_at   | ---        | Transcribed locus                                              | -1.08 | 4.35E-01 | -1.64 | 4.99E-02 | -1.08 | 9.79E-01 | 1.01  | 9.88E-01 | BF396686  | Rn.43242 |
| 18 | 81234130  | 1390569_at   | MGC93742   | Carnosinase 1                                                  | 1.33  | 4.97E-02 | -1.48 | 5.44E-02 | -1.47 | 9.54E-01 | -1.05 | 9.44E-01 | AI231438  | Rn.15548 |
| 19 | 11266456  | 1371237_a_at | Mt1a       | Metallothionein                                                | 1.06  | 7.17E-01 | -1.06 | 8.43E-01 | -1.32 | 9.87E-01 | -1.88 | 2.82E-02 | AF411318  | Rn.54397 |
| 19 | 22887531  | 1382232_at   | ---        | Transcribed locus                                              | 1.04  | 7.75E-01 | 1.38  | 3.69E-02 | -1.01 | 9.94E-01 | -1.43 | 1.39E-01 | AI454322  | Rn.20343 |
| 19 | 24969606  | 1398750_at   | Calr       | calreticulin                                                   | -1.07 | 6.06E-01 | 1.34  | 3.83E-02 | 1.05  | 9.87E-01 | -1.01 | 9.75E-01 | NM_022399 | Rn.974   |
| 19 | 36447573  | 1386947_at   | Cdh1       | cadherin 1                                                     | -1.07 | 5.18E-01 | -1.49 | 2.80E-02 | -1.01 | 9.92E-01 | -1.02 | 9.56E-01 | NM_031334 | Rn.1303  |
| 19 | 37243573  | 1398421_at   | ---        | Transcribed locus                                              | -1.21 | 2.64E-02 | -1.19 | 3.58E-01 | -1.09 | 9.36E-01 | -1.06 | 8.56E-01 | BM384203  | Rn.22934 |
| 19 | 45862849  | 1392566_at   | Maf        | V-maf musculoaponeurotic fibrosarcoma (avian) oncogene homolog | -1.00 | 9.99E-01 | -1.41 | 1.62E-02 | -1.13 | 9.79E-01 | -1.20 | 4.31E-01 | AA957811  | Rn.6545  |
| 19 | 45863020  | 1385243_at   | Maf        | V-maf musculoaponeurotic fibrosarcoma (avian) oncogene homolog | -1.05 | 7.91E-01 | -1.38 | 7.49E-03 | -1.09 | 9.87E-01 | -1.38 | 2.65E-01 | AI180340  | Rn.6545  |
| 19 | 49687022  | 1370336_at   | OkI38      | pregnancy-induced growth inhibitor                             | 1.16  | 2.30E-01 | -2.16 | 4.02E-02 | 1.22  | 9.60E-01 | 1.21  | 3.79E-01 | AY081218  | Rn.15599 |
| 20 | 20640868  | 1397831_at   | ---        | Transcribed locus                                              | -1.42 | 1.51E-03 | 1.01  | 9.88E-01 | -1.04 | 9.83E-01 | 1.08  | 8.25E-01 | AW527319  | Rn.46497 |
| 20 | 2106852   | 1372845_at   | Rpp21      | ribonuclease P 21kDa subunit (human)                           | 1.00  | 9.96E-01 | 1.37  | 4.62E-02 | -1.04 | 9.83E-01 | 1.06  | 8.35E-01 | BG380782  | Rn.3720  |

|     |          |              |            |                                                          |       |          |       |          |       |          |       |          |           |          |
|-----|----------|--------------|------------|----------------------------------------------------------|-------|----------|-------|----------|-------|----------|-------|----------|-----------|----------|
| 20  | 44212599 | 1386538_at   | RGD1310495 | similar to KIAA1919 protein                              | 1.21  | 3.57E-02 | 1.08  | 6.96E-01 | 1.13  | 8.20E-01 | 1.03  | 9.48E-01 | AW916827  | Rn.24001 |
| 20  | 5132761  | 1376271_at   | ---        | Transcribed locus                                        | 1.06  | 6.43E-01 | -1.82 | 3.83E-02 | -1.09 | 9.21E-01 | -1.27 | 3.62E-01 | AI178914  | ---      |
| X   | 26384667 | 1386990_at   | Ebp        | phenylalkylamine Ca2+ antagonist binding protein         | 1.07  | 5.07E-01 | 1.32  | 3.40E-02 | -1.00 | 1.00E+00 | 1.14  | 5.34E-01 | NM_057137 | Rn.19436 |
| X   | 26865897 | 1372931_at   | ---        | Similar to DXImx39e protein                              | -1.00 | 9.93E-01 | 1.39  | 3.65E-02 | 1.07  | 9.89E-01 | 1.10  | 5.85E-01 | AI178741  | Rn.6226  |
| X   | 27940533 | 1384274_at   | ---        | CDNA clone IMAGE:7300876                                 | -1.02 | 8.30E-01 | 2.97  | 2.60E-02 | 1.04  | 9.71E-01 | -1.05 | 8.11E-01 | BG377595  | Rn.20197 |
| X   | 40109800 | 1367744_at   | Maged2     | melanoma antigen, family D, 2                            | 1.11  | 3.28E-01 | 1.03  | 9.37E-01 | 1.05  | 9.89E-01 | 1.40  | 1.99E-02 | NM_080479 | Rn.11984 |
| X   | 73181394 | 1393669_at   | MGC105830  | similar to Ras-related protein Rab-1B                    | 1.17  | 1.61E-01 | 1.07  | 7.76E-01 | 1.30  | 5.11E-01 | 1.92  | 1.43E-03 | BM383757  | Rn.81353 |
| X   | 89447034 | 1392828_at   | ---        | Similar to OPA-containing protein 1                      | -1.04 | 7.83E-01 | -1.39 | 3.06E-02 | 1.01  | 9.94E-01 | -1.25 | 2.57E-01 | BI283139  | Rn.78344 |
| X   | 91471849 | 1368736_at   | Tsx        | testis specific X-linked gene                            | 1.41  | 4.03E-03 | -1.08 | 7.74E-01 | -1.01 | 9.91E-01 | 1.04  | 8.42E-01 | NM_019203 | Rn.11146 |
| --- | ---      | 1368080_at   | ---        | Transcribed locus                                        | 1.73  | 1.56E-02 | 1.02  | 9.47E-01 | -1.28 | 9.36E-01 | 1.04  | 8.85E-01 | NM_054008 | Rn.3504  |
| --- | ---      | 1371394_x_at | ---        | Transcribed locus                                        | -1.83 | 1.75E-06 | -1.53 | 3.63E-03 | -1.15 | 8.19E-01 | -1.12 | 5.28E-01 | BG664827  | ---      |
| --- | ---      | 1377719_a_at | ---        | Transcribed locus                                        | 1.03  | 8.61E-01 | 1.42  | 1.42E-02 | 1.09  | 9.38E-01 | -1.05 | 8.58E-01 | AA892765  | ---      |
| --- | ---      | 1377720_x_at | ---        | Transcribed locus                                        | 1.01  | 9.46E-01 | 1.31  | 4.17E-02 | 1.06  | 9.64E-01 | -1.02 | 9.36E-01 | AA892765  | ---      |
| --- | ---      | 1378413_at   | ---        | Transcribed locus                                        | -1.43 | 1.77E-03 | -2.19 | 1.70E-05 | -1.35 | 5.43E-01 | -2.01 | 1.21E-03 | BG379394  | ---      |
| --- | ---      | 1384013_at   | ---        | Transcribed locus                                        | -1.01 | 9.83E-01 | 1.03  | 9.19E-01 | 1.05  | 9.63E-01 | 1.77  | 3.40E-02 | BF524215  | ---      |
| --- | ---      | 1384027_a_at | ---        | Transcribed locus                                        | 1.31  | 8.14E-03 | -1.06 | 7.24E-01 | -1.07 | 9.36E-01 | 1.08  | 6.45E-01 | AI072042  | Rn.20680 |
| --- | ---      | 1384028_at   | ---        | Transcribed locus                                        | 1.26  | 1.65E-02 | 1.05  | 8.82E-01 | 1.02  | 9.87E-01 | -1.09 | 6.29E-01 | AI072042  | Rn.20680 |
| --- | ---      | 1384302_at   | ---        | NTT4 (Ntt4)                                              | -1.19 | 4.51E-02 | 1.04  | 8.75E-01 | 1.07  | 8.98E-01 | 1.01  | 9.76E-01 | AI712791  | ---      |
| --- | ---      | 1385805_at   | ---        | Transcribed locus                                        | 1.21  | 2.56E-02 | 1.12  | 4.80E-01 | 1.03  | 9.76E-01 | 1.03  | 9.35E-01 | AI071958  | ---      |
| --- | ---      | 1390513_at   | ---        | Transcribed locus                                        | 1.00  | 9.96E-01 | 1.44  | 2.03E-02 | 1.03  | 9.74E-01 | 1.18  | 5.02E-01 | BI291604  | ---      |
| --- | ---      | 1391481_at   | ---        | Transcribed locus                                        | -1.08 | 8.60E-01 | -1.41 | 6.21E-03 | -1.10 | 9.64E-01 | 1.01  | 9.82E-01 | BE104424  | ---      |
| --- | ---      | 1392627_x_at | ---        | Transcribed locus                                        | -1.22 | 6.29E-02 | -1.31 | 2.15E-02 | -1.90 | 1.09E-03 | -1.21 | 4.22E-01 | BI282114  | ---      |
| --- | ---      | 1393394_at   | ---        | Transcribed locus                                        | 1.08  | 6.82E-01 | 1.06  | 7.98E-01 | -1.03 | 9.88E-01 | -1.52 | 3.23E-02 | AI071827  | Rn.20649 |
| --- | ---      | 1395877_at   | ---        | Transcribed locus                                        | 1.42  | 1.24E-04 | 1.17  | 1.30E-01 | -1.00 | 9.98E-01 | 1.48  | 2.28E-01 | AW919687  | ---      |
| --- | ---      | 1368059_at   | Crym       | crystallin, mu                                           | -1.19 | 4.16E-02 | -3.27 | 3.21E-03 | -1.23 | 9.36E-01 | 1.34  | 3.56E-01 | NM_053955 | Rn.24561 |
| --- | ---      | 1375751_at   | ---        | Transcribed locus                                        | 1.30  | 2.10E-02 | -1.20 | 4.56E-01 | 1.11  | 9.74E-01 | 1.28  | 6.15E-01 | BE098727  | ---      |
| --- | ---      | 1388103_at   | Pr1        | protein distantly related to to the gamma subunit family | 1.42  | 2.14E-02 | -1.14 | 4.31E-01 | -1.00 | 1.00E+00 | 1.12  | 7.76E-01 | AF361355  | Rn.2975  |
| --- | ---      | 1375230_at   | ---        | Transcribed locus                                        | -1.58 | 5.25E-04 | -1.71 | 2.42E-03 | -1.38 | 8.34E-01 | 1.11  | 7.12E-01 | AA800192  | ---      |
| --- | ---      | 1385270_s_at | MGC105830  | similar to Ras-related protein Rab-1B                    | 1.13  | 2.86E-01 | 1.10  | 6.27E-01 | 1.31  | 4.87E-01 | 1.80  | 2.31E-03 | AI236576  | Rn.40785 |
| --- | ---      | 1382946_a_at | MGC105830  | similar to Ras-related protein Rab-1B                    | 1.05  | 7.50E-01 | 1.01  | 9.83E-01 | 1.27  | 5.43E-01 | 1.61  | 3.24E-03 | AI711306  | Rn.40785 |
